# SUBJECT INDEX

## A

**Acetazolamide.** *See under Pharmacology*

**Acid-base equilibrium**

**acidosis**

control of, without sodium bicarbonate, adjustment of ventilation during liver transplantation and [Just, Delva, Camus, Leinhart], A296

lactic, hemodynamic and metabolic effects of sodium bicarbonate, carbicarb and hypertonic saline in [Benjamin, Wang, Abalos, Klapholz, Oropello, Iberti], A1227

**bicarbonate**

buffering, potentiation of local anesthetic action of lidocaine following [Maytorena, Rogers, Bunegin, Ramamurthy], A796

hemodynamic and metabolic effects of, carbicarb and hypertonic saline in lactic acidosis [Benjamin, Wang, Abalos, Klapholz, Oropello, Iberti], A1227

improvement of outcome with, after ten minutes of cardiac arrest in dogs [Bircher], A276

titration of pH and CO<sub>2</sub> partial pressure in local anesthetic agents [Russell, Graybeal, Strout], A834

**metabolic**

adjustment of ventilation for control of, without sodium bicarbonate during liver transplantation [Just, Delva, Camus, Leinhart], A296

**Acidosis.** *See under Acid-base equilibrium*

**Acquired immune deficiency syndrome.** *See under Infections*

**Acupuncture**

P6 antiemesis, non-anesthetic use for [Dundee, Yang, Ghaly], A217

**Adapters.** *See under Equipment*

**Adenosine.** *See under Anesthetic techniques; Heart; Metabolism; Pharmacology*

**Adenosine triphosphate.** *See under Metabolism; Pharmacology*

**Adrenal hormones.** *See under Hormones*

**Adrenergic receptors.** *See under Receptors*

**Age factors**

age does not change dynamics of atracurium reversal [Muravchick], A384

age-related cocaine uptake in rats [Morishima, Khan, Hara, Cooper, Miller], A929

influence of, epidural epinephrine test doses [Guinard, Mulroy, Carpenter, Nadir], A773

onset, duration and recovery from ORG9426 in elderly [Fiset, Balendran, Bevan], A881

**Air embolism.** *See under Embolism*

**Airway**

**obstruction**

association of, with hypoxemia, and postoperative apnea in preterm infants [Kurth, LeBard, Downes], A1131

safety of airway management in trauma patients [Hanson, Rontundo, McGonigal, Kauder, Schwab], A287

**resistance**

airway hyperreactivity, impaired beta-adrenergic-cholinergic in-

teraction leading to, in basenji-greyhound (BG) [Tobias, Sauder, Hirshman], A1160

asthma, molecular mechanisms of  $\beta$ -adrenergic hyporesponsiveness in BG model of [Emala, Hirshman, Levine], A1196

barbiturate-induced airway constriction in guinea pig trachea: structure-function relationship [Curry, Lenox, Mitzner, Hirshman], A1161

beta-adrenergic sensitivity in lung periphery of basenji-greyhound (BG) and mongrel dogs [Lindeman, Freed, Hirshman], A1198

calcium chelator-induced bronchospasm, importance of prostaglandins in [Downey, Lindeman, Hirshman], A1197

during anesthesia, high resolution computer tomography (HRCT) to assess changes in [Brown, Herold, Hirshman, Mitzner, Zerhouni], A1159

effects of esmolol (E) on pulmonary reactivity in basenji-greyhound (BG) [Tobias, Sauder, Hirshman], A1194

reduced sensitivity to beta-adrenergic agonists is reversed by methylprednisolone [Sauder, Tobias, Hirshman], A1195

removal of epithelium does not affect response of isolated canine airways to halothane [Sayiner, Warner, Rehder], A1143

**Airway pressure.** *See under Ventilation*

**Alcohol**

actions of ethanol and volatile general anesthetics at boundary lipid [Firestone, Ferguson], A709

effect of ethanol vapor on detection of inhalational anesthetics using infrared and piezoelectric monitors [Crawford, Volgyesi, Carmichael, Creighton, Lerman], A522

effects of, study of proton pumps by doph-impregnated millipore membrane [Nishimura, Murata, Kamaya, Ueda], A725

effects of ethanol and acetate on MAC: role of adenosine receptors [Crawford, Lerman, Campisi, Orrego, Carmichael], A712

effects of ethanol on spinal cord blood flow and autoregulation in rats [Koziol-Ehni, Hoffman, Werner, Miletich, Albrecht], A734

general anesthetics and ethanol inhibit enzymatic activity of CNS-derived protein kinase C [Firestone, Gray, Firestone], A706

intravenous sedation and effects of, after ambulatory surgery [Lichtor, Zacny, Apfelbaum, Coalson, Dohrn, Rupani, Uitvlugt, Lane], A1074

levels in blood, a "band-aid" for detection of [Roizen, Lichtor, Lane], A512

postoperative withdrawal syndrome prophylaxis vs. therapy [Heil, Martens, Eyrick], A254

relationship between serum F<sup>-</sup> and cytochrome P-450 after sevoflurane anesthesia in ethanol treated rats [Masaki, Kondou, Kobayashi], A396

**Alfentanil.** *See under Analgesics; Anesthetics, intravenous*

**Allen's test.** *See under Arteries*

**Allergy**

incidence of anti-protamine antibody in vasectomized males [Adourian, Fuchs, Adkinson, Hirshman], A1257

intraoperative anaphylaxis to latex: an identifiable population at risk [Braude, Gold, Swartz, Dolovich, Shandling], A1106

skin tests, predictive value of, in choice of anesthetic drugs after a first anaphylactic reaction [Ocelli, Amedeo, Raucoules, Levraut, Grimaud], A1033

**Almitrine.** *See under Pharmacology*

**Alpha-Adrenergic agonists.** *See under Sympathetic nervous system*

**Alpha-adrenergic antagonists.** *See under Sympathetic nervous system*

**Amiodarone.** *See under Pharmacology*

**Amrinone.** *See under Heart; Pharmacology*

## **Analgesia**

intermittent single shot interpleural, as adjunct to narcotic therapy for chronic pancreatitis [Morris, Tapia, Gallagher, Kartha], A858

### **measurement**

activity of intravenous adenosine: comparison of potency with morphine sulfate [Ginsburg, Fukunaga, Sasaki, Kikuta, Fukunaga], A362

comparison following A-3665 and alfentanil [Cambareri, Afifi, Esposito, Glass, Camporesi], A349

effect of intrathecal fentanyl on reported pain and vasoconstriction associated with cold pressor test [Chabal, Jacobson, Freund], A839

efficacy of A3508 compared to fentanyl [Ku, Glass, Camporesi, Afifi, Quill], A835

patient-controlled, for shock wave lithotripsy (ESWL) of renal stones [Schelling, Mendl, Weber, Jocham], A803

### **postoperative**

bacteriological comparison of continuous epidural postoperative analgesia with and without use of disposable millipore filters [Bedder, Montreuil, Mulhall, Cotie, Richardson], A840

comparison of patient-controlled with intramuscular morphine, in children and adolescents [Berde, Yee, Lehn, Moore, Sethna], A1102

comparison of PCA alone and PCA with continuous infusion on pain relief and quality of sleep [McKenzie, Rudy, Tantisira], A787

comparison of postoperative intravenous and epidural opiate dose requirements [Chrubasik, Magora], A804

continuous epidural infusion of 1/8% bupivacaine for, in pediatric urology patients [Bires, McGregor], A1108

continuous epidural-PCA post-cesarean section: buprenorphine-bupivacaine 0.03% vs. fentanyl-bupivacaine 0.03% [Cohen, Amar, Pantuck, Pantuck, Weisman, Lustig], A975

continuous epidural-PCA post-cesarean section: buprenorphine-bupivacaine 0.15% with epinephrine vs. fentanyl-bupivacaine 0.15% with and without epinephrine [Cohen, Amar, Pantuck, Pantuck, Weisman, Landa], A918

continuous infusion, in supplementing alfentanil PCA, role of [Owen, Currie, Plummer, Teitzel], A1264

continuous interscalene vs. patient control, for shoulder surgery [Ali, Dobkowski, Komar, Hawkins, Varkey], A828

continuous intrathecal lidocaine infusion [Bevacqua, Slucky, Adusumilli], A833

demographic factors influencing PCA morphine requirement [Parker, Perry, Holtmann, White], A818

double blind evaluation of nalbuphine and low dose intrathecal morphine [Chebuhar, Sigurdsson, From, Choi, Anderson], A772

effect of epidural clonidine on epidural fentanyl analgesia and pharmacokinetics in postoperative patients [Rostaing, Bonnet, Levron, Vodinh, Pluskwa], A779

effect of epidurally administered sufentanil during thoracotomies: comparison with bupivacaine and saline [Haak-van der Lely, van Kleef, Gesink-van der Veer, Burm, Bovill], A770

epidural, prevents loss of lung volume [Buckley, MacIntosh], A764

epidural, reduction of deep vein thrombosis and [Sharrock, Hargett, Urquhart, Insall, Ranawat], A69

epidural clonidine infusion following cesarean section [Mendex, Eisenach, Kashtan], A919

epidural fentanyl by PCA and continuous administration [Boudreault, Brasseur], A780

epidural morphine, in non-cardiac surgery, reduction of significant cardiac morbidity by [Beattie, Buckley, Forrest], A71

epidural morphine: single bolus vs. Daymate elastomeric continuous infusion technique [Leicht, Durkan, Evans, Kelleher, Glaze], A931

epidural morphine decreases pain following trans-sternal thyrectomy in patients with myasthenia gravis [Kirsch, Diringer, Borel, Hanley, Merritt, Bulkley], A272

epidural vs. intravenous fentanyl infusions in postthoracotomy patients: analgesic and pharmacokinetic effects [Panos, Sandler, Stringer, Badner, Lawson, Friedlander, Koren], A831

epidural vs. intravenous fentanyl infusions in postthoracotomy patients: respiratory effects [Stringer, Sandler, Panos, Badner, Lawson, Friedlander], A781

evaluation of continuous epidural fentanyl/butorphanol infusion for [Lubenow, Durrani, Ivankovich], A800

following breast surgery: comparison of intrapleural bupivacaine and intramuscular opiate [Joris, Lemarchand, Pirlet, Desaise, Meurisse, Foidart, Lamy], A765

following gynecological surgery, comparison of epidural and intravenous PCA [Walmsley, McDonnell, Colclough, Kennedy, Witt, Littrell, Pedito], A1268

following intrathecal fentanyl-lidocaine for postpartum tubal ligation surgery [Durkan, Leicht, Evans], A932

following joint replacement surgery, "smoother" pain control with epidural vs. patient-controlled IV morphine [Weller, Rosenblum, Conard, Gross], A823

following knee joint replacement, addition of bupivacaine 0.1% does not improve postoperative epidural fentanyl analgesia [Badner, Reimer, Moote, Komar], A761

following laparoscopic surgery, ibuprofen provides better analgesia than fentanyl [Rosenblum, Weller, Conard, Falvey, Gross], A778

following laparoscopic tubal ligation,  $\alpha$ 2-agonist, dexmedetomidine as [Aho, Lehtinen, Erkola, Korttila], A334

following thoracotomy, pain management and pulmonary function: a prospective randomized study [Miguel, Hubbell], A777

impact of pain service on length of stay and complication rates of post-abdominal delivery patients [Slover, Hodges, Tinnell, Palmer], A995

impact of postoperative epidural bupivacaine infusion on intravascular and extracellular fluid compartments [Burgess, Brooks, Wade, Perkins, Rodkey], A841

in infants and young children, efficacy and safety of low-dose caudal morphine for [Savarese, McGowan, Oh, O'Connor], A1129

interpleural bupivacaine, during and after hepatic artery chemembolization [Meakem, Frink, Fajardo, Pond], A814

interpleural local anesthetic, does administration produce a sympathetic block? [Pelligrino, Laurito, Albrecht], A755

intra-articular morphine, following arthroscopic knee surgery [Stein, Comisel, Yassouridis, Herz, Peter], A766

intraoperative and, in children undergoing inguinal herniorrhaphy: comparison of caudal bupivacaine 0.125% and 0.25% [Rice, Binding, Vaughn, Thompson, Newman], A3

intrapertoneal local anesthetics and scapular pain following day-case laparoscopy [Narchi, Lecoq, Fernandez, Benhamou], A5

intrapertoneal local anesthetics during laparoscopy [Narchi, Benhamou, Fernandez, Legendre, Mazoit], A824

- intrapleural, best pulmonary function after cholecystectomy with [Frenette, Boudreault, Guay], A829
- intrapleural, with bupivacaine following thoracotomy is inefficient: results of controlled study and pharmacokinetics [Elman, Debaene, Orhant, Metrot, Murciano], A767
- intrapleural bupivacaine vs. saline placebo after thoracotomy [McEllistrem, Hurley, O'Toole, Chambers, Keane], A759
- intrathecal morphine, disposition and respiratory effects of, in children [Nichols, Yaster, Deshpande, Helfaer, Lynn, Bezman, Tobias], A1135
- intrathecal morphine reduces post thoracotomy meperidine requirements [Cohen, Neustein, Ali, Thys], A801
- long-acting opioids, administered in recovery room [Henelten, Schwieger, Forster], A1266
- oral transmucosal fentanyl citrate (OTFC) for treatment of [Lind, Ashburn, Gillie, deBoer, Stanley], A783
- oxygen saturation following administration of buprenorphine or morphine during postoperative period [Fischler, Basdevant, Gauthier-Feissel, Raffin, Sperandio], A1252
- patient-controlled, does intrapleural lidocaine infusion decrease morphine consumption after thoracotomy? [Raffin, Antoniotti, Sperandio, Mazoit, Fischler], A826
- patient-controlled epidural: efficient and effective! [Miguel, Trimble], A795
- patients with substance abuse history can effectively use PCA [Stacey, Brody, Burke], A760
- perioperative with subarachnoid sufentanil-bupivacaine [Courtney, Badner, Hartwell, Hauch, Datta], A994
- post-cesarean, dose-response study of continuous infusion epidural fentanyl-epinephrine for [Youngstrom, Hoyt, Herman, Group, Ditto], A980
- post-vaginal delivery pain, epidural fentanyl for [Colburn, Mandell, Rudy], A986
- pruritus control following epidural opiates through continuous infusion plus self-administration of mu antagonists vs. mixed agonist-antagonists in post-cesarean section population [Kendrick, Birch, Woods], A941
- respiratory depression, antagonism of, caused by large doses of morphine [Radvanyi, Marin, Bikhazi, Folds], A1173
- sciatic nerve block, for fractured tibia [Roupie, Mahiou, Fraise, Jean, Pasteur], A825

## Analgesics

### alfentanil

- A-3665, comparison of analgesia following [Cambareri, Afifi, Esposito, Glass, Camporesi], A349
- effects of, for ophthalmic nerve blocks [Stead, Northfield], A769
- epidural fentanyl and, pharmacokinetic profiles of: bolus followed by continuous infusion technique [Wilhite, Moore, Christmas, Frank], A940
- fentanyl, sufentanil and, administered by epidural continuous infusion during labor, pharmacokinetics in mothers and neonates of [Palot, Visseaux, Levron, Le Moing, Rendoing], A1002
- fentanyl and isoproterenol, oral transmucosal permeability of, in dog model: pH dependence [Zhang, Ebert, de Boer, Niu, Stanley], A367
- long-term infusion of, for sedation in ICU patients, pharmacokinetics of [Martin, Albanese, Alazia, Levron], A335
- naloxonazine blocks alfentanil-induced analgesia but not muscle rigidity in rat [Weinger, Broonson, Furst, Pasternak], A331
- spinally administered mu opioid agonists, differences in intrinsic efficacy of [Yaksh, Mjanger, Crone], A786

### butorphanol

- fentanyl and fentanyl+midazolam vs., for ambulatory patients having regional anesthesia, double blind study of [Phillip, Muschlin, Cnaan, Bizzarri-Schmid, Courtney, Dedrick], A39

### fentanyl

- alfentanil, sufentanil and, administered by epidural continuous infusion during labor, pharmacokinetics in mothers and neonates of [Palot, Visseaux, Levron, Le Moing, Rendoing], A1002
- analgesic efficacy of A3508 compared to [Ku, Glass, Camporesi, Afifi, Quill], A835
- butorphanol vs. fentanyl+midazolam and, for ambulatory patients having regional anesthesia, double blind study of [Phillip, Muschlin, Cnaan, Bizzarri-Schmid, Courtney, Dedrick], A39
- comparison of nalmefene with naloxone against fentanyl-produced antinociception in rats [Ossipov, Harris, Messineo, Spaulding, Levinson, Jerussi], A330
- coronary conductance by, mechanisms mediating modulation of baroreflex regulation of, in chronically instrumented dogs [Moore, Porges, White, Quail], A664
- epidural alfentanil and, bolus followed by continuous infusion technique, pharmacokinetic profiles of [Wilhite, Moore, Christmas, Frank], A940
- fentanyl citrate, oral transmucosal, for treatment of postoperative pain [Lind, Ashburn, Gillie, deBoer, Stanley], A783
- fentanyl citrate: oral transmucosal vs. gastrointestinal absorption [Streisand, Tarver, Varvel, Demmink, Hauge], A369
- ibuprofen provides better analgesia than, following laparoscopic surgery [Rosenblum, Weller, Conard, Falvey, Gross], A778
- infusion, rapid development of tolerance during [Arnold, Truog], A406

### ibuprofen

- better than fentanyl, following laparoscopic surgery [Rosenblum, Weller, Conard, Falvey, Gross], A778

### meperidine

- distribution of self-administered morphine and meperidine into human breast milk: acute neonatal neurobehavioral effects [Wittels, Scott, Sinatra], A921
- effect of naloxone and, on cold-induced shivering [Cooper, McMurray, Pavlin, Schoene, Freund], A230
- intrathecal, for labor analgesia [Norris, Boreen, Leighton, Mingey, Kent], A983
- methylphenidate vs., for treatment of postanesthesia shivering [Boylan, Gallagher, Kelly, Stritch, MacEvilly], A1067

### morphine

- analgesic efficacy of pentamorphine to, assessment of [Ginsberg, Muir, Damask, Quill, Glass], A836
- antinociceptive effects of midazolam, amitriptyline and carbamazepine alone and in combination with, quantitative assessment of, in mice, [Liao, Liu, Takemori], A753
- comparison of oxymorphone with, nausea and vomiting after general anesthesia [Popic, Jameson], A1063
- comparison of potency of intravenous adenosine with, [Ginsburg, Fukunaga, Sasaki, Kikuta, Fukunaga], A362
- differences in intrinsic efficacy of spinally administered mu opioid agonists in production of analgesia [Yaksh, Mjanger, Crone], A786
- effect of administration of, on spinal  $\beta$ -endorphin levels [Gutstein, Bronstein, Akil], A683
- gastric stasis induced by, influence of rectal cisapride on [Kluger, Owen, Plummer], A326
- intrathecal, low dose, nalbuphine in patients receiving: prospective double blind evaluation [Chebuhar, Sigurdsson, From, Choi, Anderson], A772
- intrathecal, nalmefene for reversal of respiratory depression secondary to [Lowdon, Yeung, Isaacson, Bikhazi, Grunow], A385
- intrathecal, pharmacokinetics of, in cesarean section [Zakowski, Grant, Khoo, Ramanathan, Turndorf], A946

- PCA requirement, demographic factors influencing [Parker, Perry, Holtmann, White], A818
- self-administered meperidine and, acute neonatal neurobehavioral effects of distribution into human breast milk [Wittels, Scott, Sinatra], A921
- nalbuphine**
- in patients receiving low dose intrathecal morphine: prospective double blind evaluation [Chebuhar, Sigurdsson, From, Choi, Anderson], A772
- oxymorphone**
- comparison of morphine with, nausea and vomiting after general anesthesia [Popic, Jameson], A1063
- pentamorphine**
- analgesic efficacy of, to morphine, assessment of [Ginsberg, Muir, Damask, Quill, Glass], A836
- piperidine**
- analgesic efficacy of A3508 compared to fentanyl [Ku, Glass, Camporesi, Afifi, Quill], A835
- sufentanil**
- differences in intrinsic efficacy of spinally administered mu opioid agonists in production of analgesia [Yaksh, Mjanger, Crone], A786
  - epidural continuous infusion during labor, pharmacokinetics in mothers and neonates of fentanyl, alfentanil and, [Palot, Visseaux, Levron, Le Moing, Rendoing], A1002
  - intrathecal, for labor analgesia: results of a pilot study [Leicht, Evans, Durkan], A981
  - IV infusion, efficacy of, after coronary artery surgery [Durkan, Tobiason, Diveley], A58
- tolerance**
- does chronic intracerebroventricular infusion of thiorphan produce tolerance and dependence in rat? [Eustache, Michael-Titus, Bousselmame, Costentin], A674
  - effect of chronic morphine administration on spinal  $\beta$ -endorphin levels [Gutstein, Bronstein, Akil], A683
  - opioid tolerance-effect of pertussis toxin [Wong, Change, Su, Watkins], A716
  - rapid development of, during fentanyl infusion [Arnold, Truog], A406
- Analyzers. See under Equipment**
- Anatomy**
- peridural space**
    - epidural space behaves as startling resistor and inflow resistance is higher in spinal stenosis than in disc disease [Rocco, Scott, Boas, Philip], A816
- Anemia. See under Blood**
- Anesthesia. See also Induction; Sympathetic nervous system**
- appraisal of quality of assessment of memory in anesthesia and psychopharmacology literature [Ghoneim, Ali, Block], A210
- cardiovascular**
- bilateral single lung transplantation: anesthetic management and intraoperative considerations [Triantafyllou, Heerdt, Herbst, Pond, Despotis], A90
  - brain oxygenation during cardiopulmonary bypass and total circulatory arrest in children by near infrared spectroscopy, evaluation of [Bracey, Greeley, Greibel, Kern, Ungerleider, Reves, Piantadosi], A1109
  - calcium mobilization, impaired, in children undergoing cardiopulmonary bypass [Robertie, Butterworth IV, Dudas, Ward, Zaloga], A1137
  - cerebral blood flow and metabolism are independent of pump flow rate during hypothermic cardiopulmonary bypass in children [Kern, Greeley, Ungerleider, Quill, Baldwin, Smith, Reves], A1107
  - cerebral hemodynamics during hypothermic low flow bypass [Pilato, Hickey], A1244
  - comparison of desflurane and isoflurane for coronary surgery [Bowering, Thomson, Hudson, Peters, Rosenbloom], A321
  - effect of extracorporeal membrane oxygenation on cerebral blood flow autoregulation in newborn lamb [Bender, Short, Walker, Jones, Traystman], A1226
  - effect of mixture of pancuronium and vecuronium on heart rate during anesthesia for cardiac operations [Braubert], A909
  - effects of cardiopulmonary bypass on alfentanil pharmacokinetics and protein binding in infants and children [Davis, Stiller, Cook], A1120
  - enoximone: a new therapeutic concept in right ventricular repair in pediatric surgery [Jayais, Mauriat, Pouard, Journois], A1238
  - fentanyl-midazolam anesthesia for cardiac surgery and postoperative care: comparison of bolus vs. combined infusion techniques [Sladen, Berend, Lu, Hodgins, Yevak], A268
  - hemodilution for heart surgery in children [Rosen, Rosen, Bove, Callow, Wilton], A1242
  - hemodynamic alterations during autologous blood donation for children in severe cyanotic heart disease [Gombotz, Stein, Suppan, Metzler, Beitzke], A1118
  - hemodynamic effects of desflurane vs. isoflurane in patients undergoing coronary bypass graft surgery [Ross, Gomez, Lemmer, Bates, Tinker], A165
  - infusion of propofol vs. infusion of midazolam for sedation in ICU following coronary artery surgery [Roekaerts, Huygen, deLange], A227
  - intraoperative echocardiography in children with congenital cardiac shunt lesions: comparison of transesophageal and epicardial echocardiography [Muhiudeen, Roberson, Silverman, Turley, Haas, Corver, Cahalan], A103
  - intraoperative echocardiography in infants and children with regurgitant valvar lesions: comparison of TEE and epicardial echocardiography [Muhiudeen, Roberson, Silverman, Turley, Haas, Corver, Cahalan], A104
  - lung mechanics and airway pressure transmission in infants after open-heart surgery [Räsänen, Peltola, Leijala], A285
  - midazolam infusion modifies pre-bypass hemodynamics under high dose alfentanil anesthesia [Schlumberger, Cedda, Raffin, Dubois, Fischler], A153
  - preoperative extracorporeal membrane oxygenation in congenital diaphragmatic hernia, pulmonary effects of [Nakayama, Motoyama, Smith, Tagge], A1241
  - stress of spontaneous breathing in children recovering from open heart surgery [Räsänen, Puhakka], A309
  - stress responses in children undergoing open heart surgery [Vitkun, Scott, Backus, LaGade, Poppers], A1110
  - sufentanil IV infusion after coronary artery surgery, efficacy of [Durkan, Tobiason, Diveley], A58
  - thyroid function on ECMO [Schwartz, Fackler], A310
- depth**
- does EEG predict anesthetic depth better than cardiovascular variables? [Dutton, Smith, Smith], A532
  - does RO15-4513 act specifically, or functionally, to increase anesthetic requirement? [Pearce-Smith, Winter, Firestone], A407
  - EEG as measure of thiopental anesthetic depth [Hung, Varvel, Shafer, Stanski], A391
  - effect of epidural administration of buprenorphine and morphine on central nervous system and minimum alveolar concentration in man [Kukushima, Yonemura, Nishimi], A820
  - effect of transcutaneous cranial electrical stimulation on halothane requirements in rats [Mantz, Azerad, Limoge, Thierry, Glowinski, Desmonts], A671
  - effects of ethanol and acetate on MAC: role of adenosine receptors [Crawford, Lerman, Campisi, Orrego, Carmichael], A712

- halothane concentration blocking cardiovascular responses to incision in infants and children [Ishizawa, Dohi], A1116
- halothane requirement in mice selectively bred for sensitivity and resistance to diazepam [McCrae, Gallaher, Winter, Firestone], A708
- indicator of, intraoperative changes in respiratory sinus arrhythmia [Latson, Martin, Isaac], A520
- intracerebroventricular potassium channel agonists do not decrease MAC in rats [Zucker, Calkins], A676
- intravenous ATP attenuates surgical stress responses and reduces inhalation anesthetic requirements in humans [Fukunaga, Kaneko, Ichinohe, Igarashi, Nakakuki], A400
- lower esophageal contractility monitoring prolongs recovery after outpatient anesthesia [Zahl, Shapiro, Sampson, Mingus, Prasad, Silvey], A40
- minimum alveolar concentration of spinal cord reflexes in rats [Soriano, Benthuyssen, Reitan], A705
- neural network estimation of anesthetic dose using EEG spectral signatures [Watt, Navabi, Scipione, Hameroff, Maslana], A470
- electroconvulsive therapy**
- change in effectiveness of esmolol when used in repeated doses in [Howie, McSweeney, Zvara, Coffman, Black], A374
- computer-processed EEG monitoring for, issue of interrater reliability of seizure duration [Isley, Kafer, Mann, Kong, Gilmore, Golden], A467
- effects of clonidine, labetalol and esmolol on hemodynamics and seizure during [Reddy, Rao, Trivedi, Idupuganti, Shevde], A1201
- propofol vs. methohexital for [Mokriski, Nagle, Papuchis, Waxman, Cohen, Wagner], A172
- evaluation**
- correlation between two physical status measures and ASA physical status score [Coalson, Roizen, Apfelbaum, Rupani, Roberts, Finn, Schneider, Lichtor, Uitylugt, Thisted], A1253
- does short-term use of automated device (health quiz) for preoperative test selection affect physicians' test-ordering habits? [Hung, Lin, Roizen, Apfelbaum, Thisted, Coalson, Lichtor, Finn, Rupani], A1018
- effectiveness of preanesthetic instructions on postoperative physiological recovery [Bennett, Disbrow], A1055
- how frequently do asymptomatic patients benefit from pursuit of abnormalities in their preoperative test results? [Apfelbaum, Roizen, Robinson, Murray, Grogono, Duke, Kim, Roberts, Rupani, Texidor, Gronert, White, Poler, Coalson, Youngberg, Dionne, Stocking, Thisted], A1254
- preoperative concerns of parents whose children are admitted thru ambulatory surgical unit [Rypel, Guertin, Cartabuke, Nouri, Howie], A1084
- project pearls: a methodology to enhance information transfer from a preanesthetic evaluation clinic to surgical suite [Larkin, Griffith, Wallace, Lumb], A1034
- geriatric**
- aging increases patient sensitivity to hyponotic effects of midazolam [Marty, Goodman, Smith, Jacobs, Reves], A395
- aging increases sensitivity to midazolam [Marty, Reves, Croughwell, Goodman, White, Smith, Jacobs], A358
- does aging alter rate of elimination of isoflurane? [Dwyer, Clarke, Fee], A357
- effect of spinal anesthesia in geriatric patients with heart disease: choice of vasopressor therapy to reverse hemodynamic changes [Rooke, Freund, Jacobson, Cerqueira], A140
- effect of spinal anesthesia in geriatric patients with heart disease: hemodynamic and blood volume profile [Rooke, Freund, Jacobson, Cerqueira], A139
- intraoperative course and recovery following anesthesia with etomidate or propofol in patients over 80 years, comparison of [Servin, Pommereau, Rowan, Nimier, Desmonts], A318
- preoxygenation in elderly: how long a period? [McCarthy, Mirakhor, McLoughlin, Elliott], A1007
- spinal anesthesia with 3 ml of 0.125% bupivacaine for orthopedic procedures in elderly patients [Labaille, Benhamou, Westerman], A830
- neurosurgical**
- celiac plexus block for therapy of gastrointestinal dysfunctions in neurosurgical ICU patients [Weinstabl, Proges, Plainer, Werba, Spiss], A843
- EEG for determining propofol requirement during neuroanesthesia [Van Hemelrijck, Tempelhoff, Jellish, White], A202
- effect of desflurane on cerebrospinal fluid pressure in neurosurgical patients [Muzzi, Losasso, Dietz, Faust, Milde], A1215
- effects of clonidine premedication in neurosurgical patients [Gaubmann, Tassonyi, Rivest, Fathi, Reverdin], A1211
- hyponatremia in TURP patient: does IV fluid choice make a difference? [Landry, Schwartz, Cope], A1029
- influence of hydroxyethylstarch on coagulation in neurosurgery [Claes, Vangerven, Arnout, Vermeylen, Van Aken], A1222
- mixed venous oxygen saturation during sitting neurosurgical procedures, continuous monitoring of [Khoury, Cagny-Bellet, Tondriaux, Tchaousoff, Ossart], A184
- respiratory complications of venous air embolism during neurosurgery [Toth, Mendelsohn, Tausk, Marlar, Shamsi], A198
- shock wave lithotripsy of renal stones, patient controlled analgesia for [Schelling, Mendl, Weber, Jocham], A803
- SSEP monitoring in neurosurgical patients in sitting position [Marlar, Shamsi, Tausk, Eisenkraft], A199
- thiopental-isoflurane-N<sub>2</sub>O, propofol-N<sub>2</sub>O, and propofol alone for neuroanesthesia, comparison of [Van Hemelrijck, Tempelhoff, Jellish, White], A167
- venous air embolism in pediatric neurosurgical procedure, prevention of, by using MAST [Meyer, Jayais, Quenet, Barrier], A1101
- obstetric**
- birth cry, analysis of, its relation to anesthesia and mode of delivery [Shin, Sider], A977
- breast milk, human, distribution of self-administered morphine and meperidine into, acute neonatal neurobehavioral effects [Wittels, Scott, Sinatra], A921
- cesarean delivery, silent myocardial ischemia in healthy parturients during [Mathew, Fleisher, Sevarion, Rosenbaum], A992
- cesarean delivery in severe preeclampsia, maternal stress response during [Ramanathan, Sibai], A988
- cesarean delivery under regional anesthesia, echocardiographic evaluation of maternal myocardial function during [Palmer, Fenster, Boswell, Scipione], A939
- cesarean section, bladder vs. tympanic core temperature measurement during [Glosten, Sessler, Faure, Karl], A960
- cesarean section, clinical evaluation of prostaglandin E<sub>1</sub> administration during [Aoki, Watanabe, Fukushima, Mori, Kobayashi], A997
- cesarean section, epidural anesthesia with butorphanol and lidocaine for, maternal effects of neonatal outcome [Abboud, Zhu, Reyes, Steffens, Afrasiabi, Vera Cruz, Miller], A935
- cesarean section, epidural clonidine infusion following [Mendex, Eisenach, Kashtan], A919
- cesarean section, epidural vs. spinal anesthesia for, effects on neonates [Ferrut, Lancon, Douvier, Marcoux, Caillard], A924
- cesarean section, neuronal oscillations in auditory evoked potentials indicate wakefulness during [Schwender, Madler, Keller, Pöppel], A923

- cesarean section, pharmacokinetics of intrathecal morphine in [Zakowski, Grant, Khoo, Ramanathan, Turndorf], A946
- cesarean section, predictive signs of hypotension after spinal anesthesia for [Casteil, Blanot, Lienhart], A991
- cesarean section, recurrent herpes simplex virus labialis following [Weiss, Carney, Norris, Leighton, Torjman], A951
- coagulopathies in high-risk parturients, is thromboelastography useful for evaluation of? [Campbell, Nahrwold], A993
- dural puncture, unexpected, maternal obesity and headache following [Heyman, Salem, Joseph], A971
- epidural anesthesia, does magnesium sulfate worsen maternal hypotension during?, in gravid ewes? [Vincent, Chestnut, Sipes, Thompson, DeBruyn, Bleuer], A926
- epidural anesthesia, repeated, reliable in obstetric patients? [Narchi, Hamza, Jullien, Lecoq], A954
- epidural anesthesia, what is more comfortable position for parturient during induction of? [Vincent, Chestnut, Russell, Walker, Ostman], A978
- epidural block, comparison between gravity and bolus administration of local anesthetics during [Cohen, Amar], A974
- epidural test dose, lidocaine 45mg in, is not marker of intravascular injection in parturients [Lingaraju, Colonna-Romano, Mazala], A976
- epidural test dose as marker of intravascular injection, clinical sensitivity and specificity of [Colonna-Romano, Lingaraju, Mazala, Horrow], A925
- epinephrine test dose and epidural morphine side effects [Kavee, Winter, Zakowski, Ramanathan, Turndorf], A990
- failed intubation, incidence of: is there an irreducible minimum? [Glasenberg Vaisrub, Albright], A1062
- hypertension, pregnancy-induced, risk factor for difficult intubation? [Dupont, Jamza, Jullien, Narchi], A985
- hypertension and bleeding, pregnancy-induced, in parturients under epidural anesthesia [Troche, Hamza, Narchi, Lecoq], A998
- hypotension after regional anesthesia, continuous non-invasive blood pressure for detection of [Wilkin, Um, Block Jr., McDonald], A968
- ilioinguinal nerve blocks: an alternative or supplement to intrathecal morphine? [Witkowski, Leighton, Norris], A962
- labor, continuous subarachnoid sufentanil for analgesia during [Naulty, Barnes, Becker, Pate], A964
- labor, epidural butorphanol augments lidocaine analgesia during [Zhu, Abboud, Afrasiabi, Reyes, Sherman, Vera Cruz, Stefens], A979
- labor, intrathecal narcotics for: efficacy of morphine 0.5 mg, 0.75 mg, 1.0 mg, combined with fentanyl 25 mcg [Mankad, Seegers, Pickard, Dark-Mezick, Shah], A1001
- labor, low dose alfentanil vs. fentanyl with bupivacaine for continuous epidural infusion for [Ray, Datta, Johnson, Bader], A933
- labor, pharmacokinetics in mothers and neonates of fentanyl, alfentanil and sufentanil administered by epidural continuous infusion during [Palot, Visseaux, Levron, Le Moing, Rendoin], A1002
- labor, neonatal neurobehavioral effects of continuous epidural infusion of fentanyl/bupivacaine/epinephrine in [Hoyt, Youngstrom], A984 meperidine for [Norris, Boreen, Leighton, Mingey, Kent], A983
- labor analgesia, intrathecal sufentanil for [Leicht, Evans, Durkan], A981
- labor and delivery, comparison of .0312% bupivacaine plus sufentanil and .0625% bupivacaine plus sufentanil for epidural anesthesia during [Williams, Kwan, Chen, Wu], A950
- labor and delivery, epidural PCA vs. continuous infusion of sufentanil-bupivacaine for analgesia during [Naulty, Barnes, Becker, Pate, Griffith], A963
- labor pain, use of 28g continuous spinal catheters to administer fentanyl in management of: dose finding study [El-Naggar, Farag, Kartha], A970
- obesity, morbid, in parturient [El-Naggar, Mehta, Kartha], A1000
- oral antacids, in emergency obstetrical anesthesia, comparative study of: effects on pH and volume of gastric content [Armand, Jasson, Mazuir, Talafre, Tallet, Conseiller], A987
- post-abdominal delivery, impact of a pain service on length of stay and complication rates of [Slover, Hodges, Tinnell, Palmer], A995
- post-cesarean analgesia, continuous infusion epidural fentanyl-epinephrine for: dose-response study [Youngstrom, Hoyt, Herman, Group, Ditto], A980
- post-cesarean delivery analgesia, epidural sufentanil and morphine for [Naulty, Parmet, Pate, Becker, Loeffler, Barnes], A965
- post-cesarean oxygen saturation via telemetric pulse oximetry network [Pan, James], A943
- post-cesarean section, continuous epidural-PCA: buprenorphine-bupivacaine 0.03% vs. fentanyl-bupivacaine 0.03% [Cohen, Amar, Pantuck, Pantuck, Weisman, Lustig], A975
- post-cesarean section, continuous epidural-PCA: buprenorphine-bupivacaine 0.15% with epinephrine versus fentanyl-bupivacaine 0.15% with and without epinephrine [Cohen, Amar, Pantuck, Pantuck, Weisman, Landa], A918
- post-cesarean section immediate relief, in patient already receiving epidural morphine, comparison between epidural sufentanil and epidural bupivacaine used for [Seitman], A989
- post-cesarean section population, pruritus control following epidural opiates through continuous infusion plus self-administration of mu antagonists vs. mixed agonist-antagonists in [Kendrick, Birch, Woods], A941
- post-dural headache, incidence of, after subarachnoid block for postpartum tubal ligation: comparison of 26 vs. 30 g needles [Herman, Knape, Husain, Karuparthy, Downing], A972
- post-dural puncture headache, incidence of, in cesarean section patients using 24-G Sprotte needle [Sears, Leeman, O'Donnell, Kelleher, Santos], A1003
- post-dural puncture headache, intravenous caffeine for, efficacy of [Abboud, Zhu, Reyes, Steffens, Afrasiabi, Gendein], A936
- postpartum tubal ligation, postoperative analgesia after intrathecal fentanyl-lidocaine for [Durkan, Leicht, Evans], A932
- post-spinal headache, incidence of, after continuous subarachnoid analgesia for labor using a 32g microcatheter [Benedetti, Chadwick, Mancuso, Ross, Tiengo], A922
- post-vaginal delivery pain, epidural fentanyl for [Colburn, Mandell, Rudy], A986
- preeclampsia, endothelin levels in patients with [Danner, Thorp, Geer, Goetz], A947
- perioperative analgesia with subarachnoid sufentanil-bupivacaine [Courtney, Badner, Hartwell, Hauch, Datta], A994
- placenta, perfused human, transport of thiopental across [Herman, Downing, Johnson, Knape, Schenker], A973
- risk factors associated with difficult airway in normotensive parturients [Dupont, Hamza, Jullien, Narchi], A999
- risk factors associated with postpartum backache in obstetric patients [Lecoq, Hamza, Narchi, Jullien, Attane], A966
- risk factors for postpartum backache associated with epidural anesthesia [Benlabeled, Hamza, Jullien, Troche, Lecoq], A996
- spinal anesthesia with hyperbaric bupivacaine and lidocaine for cesarean section: a pilot study [Jassy, Tom], A982
- ultrasound examination of stomach contents in pregnant patients [Carp, Jayaram, Cramp], A957

**ophthalmologic**

- alfentanil analgesia for ophthalmic nerve blocks, effects of [Stead, Northfield], A769
- Hudson's Mask, use of, for short ophthalmological procedures in children results in low complication rate [Susman, Shah], A37
- retrobulbar local anesthetic spread to neural membranes of eyeball, optic nerve and arachnoid villi in optic nerve, relationship of [Shantha], A850

**orthopedic**

- brachial plexus blockade vs. general anesthesia for orthopedic operation on upper extremity in outpatients [Baysinger, Bowe, Bowe, Sykes], A43
- circulatory, neurologic, and blood gas changes during total knee replacement: role of intramedullary alignment rod [Fahmy, Chandler, Daylchuk, Sunder, Matta], A1258
- intra-articular morphine produces analgesia following arthroscopic knee surgery [Stein, Comisel, Yassouridis, Herz, Peter], A766
- methymethacrylate cement, does use of, induce hemodynamic or pulmonary instability? [Huffnagle, Torjman, Marr, Fenlin, Seltzer], A1021
- nicardipine, deliberate hypotension with, during spine fusion for scoliosis [Bernard, Pinaud, Francois, Souron], A1203
- rapid sequence induction, effect on lower leg fascial compartment pressure [Varlotta, Beckenstein, DiPasquale, Doyle], A908
- spinal anesthesia with 3 ml of 0.125% bupivacaine for orthopedic procedures in elderly patients [Labaille, Benhamou, Westerman], A830
- subarachnoid blockade vs. general anesthesia for knee arthroscopy in outpatients [Bowe, Baysinger, Sykes, Bowe], A45
- varying narcotic requirements among orthopedic patients [Preble, Paige, Sinatra, O'Connor, Sevarion], A813

**otolaryngologic**

- nitrous oxide does not increase postoperative nausea/vomiting in pediatric outpatients undergoing tonsillectomy-adenoidectomy [Pandit, Pryn, Randel, Levy, Lewis], A1245
- sufentanil and fentanyl anesthesia for adenotonsillectomy in pediatric patients [Spence, Pinto, Lyew, Henderson], A1115

**outpatient**

- adaptable computer model of economic effects of alternative anesthetic regimens in outpatient surgery [Marais, Maher, Wetchler, Sung], A54
- brachial plexus anesthesia [Davis, Lennon, Wedel], A26
- brachial plexus blockade vs. general anesthesia for orthopedic operation on upper extremity in outpatients [Baysinger, Bowe, Bowe, Sykes], A43
- butorphanol vs. fentanyl and fentanyl+midazolam for ambulatory patients having regional anesthesia: double-blind randomized study [Philip, Muschlin, Cnaan, Bizzarri-Schmid, Courtney, Dedrick], A39
- comparison of alfentanil and isoflurane anesthesia on pressor and catecholamine responses during outpatient laparoscopic surgery [Ramanathan, Nocollerat, Birch, Coleman, Heerd], A50
- comparison of propofol and midazolam-propofol for outpatient anesthesia: recovery characteristics [Petit, Narchi, Legendre, Benhamou], A31
- desflurane, vital capacity rapid inhalation induction with [Hartman, Kelly, Embree, Artusio], A20
- desflurane vs. isoflurane with or without N<sub>2</sub>O for outpatient laparoscopy [Zahl, Prasad, Mingus, Shapiro], A11
- drinking before discharging children from day surgery: is it necessary? [Martin, Whitney, Seidl-Friedman, Nicolson, Schreiner], A1122

droperidol dose-response in outpatients following alfentanil-N<sub>2</sub>O anesthesia [Mingus, Zahl, Bradford, Kroening, Eisenkraft], A34

enflurane vs. isoflurane with fentanyl and droperidol: anesthetic outcome after outpatient laparoscopy [Levy, Pandit, Randel, Lebenbom- Mansour, Kothary], A35

epidural vs. general anesthesia for outpatient arthroscopy, prospective evaluation of [Parnass, McCarthy, Bach, Werling, Hasson], A23

esmolol, therapeutic role in perioperative hypertension in ambulatory surgery [Dimich, Singh, Sampson, Pratilas, Sonnenklar], A12

evaluation of outpatients receiving propofol or other anesthetic agents for extracorporeal shock wave lithotripsy: quality assurance analysis [Jahr, Texidor, Kuchta, Kelley], A30

famotidine, effects on gastric acidity and volume in ambulatory surgery patients [Kao, Schaub, Tellez], A47

intrapertitoneal local anesthetics and scapular pain following day-case laparoscopy [Narchi, Lecoq, Fernandez, Benhamou], A5

intravenous sedation and effects of alcohol after ambulatory surgery [Lichter, Zacny, Apfelbaum, Coalson, Dohrn, Rupani, Uitvlugt, Lane], A1074

lower esophageal contractility monitoring prolongs recovery after outpatient anesthesia [Zahl, Shapiro, Sampson, Mingus, Prasad, Silvay], A40

nitrous oxide does not increase postoperative nausea/vomiting in pediatric outpatients undergoing tonsillectomy-adenoidectomy [Pandit, Pryn, Randel, Levy, Lewis], A1245

ondansetron decreases emetic symptoms following outpatient laparoscopy [Wetchler, Sung, Duncalf, Joslyn], A36

ondansetron is effective new antiemetic after outpatient anesthesia [Poler, Bodner, White], A18

preoperative concerns of parents whose children are admitted thru ambulatory surgical unit [Rypel, Guertin, Cartabuke, Nouri, Howie], A1084

psychomotor recovery after desflurane vs. isoflurane in outpatients [Ghouri, Bodner, White], A9

recovery of respiratory muscle function in surgical outpatients [Stanec, Nuesa, Akturk, Pillon, Capek], A878

regional vs. general anesthesia in outpatients [Bowe, Baysinger, Sykes, Bowe], A44

sedation-analgesia for outpatient lithotripsy: ketamine vs. alfentanil [Monk, Rader, Boure, White], A8

some patients may drink or drive after ambulatory surgery [Lichter, Sah, Apfelbaum, Zacny, Coalson], A1083

spinal anesthesia with 27-gauge needles for ambulatory surgery patients [Kang, Goodnough, Lee, Olson, Krueger], A2

subarachnoid blockade vs. general anesthesia for knee arthroscopy in outpatients [Bowe, Baysinger, Sykes, Bowe], A45

timing of preoperative evaluation for surgical outpatients: does it really matter? part two [Twersky, Frank, Lebovitz], A1

**pediatric**

additive contribution of N<sub>2</sub>O to halothane MAC in infants and children [Murray, Mehta, Forbes, Dull], A1235

anesthesia for pediatric cancer patients: ketamine, etomidate or propofol? [Barst, McDowall, Pratilas, Scher, Shah, Alagesan, Lafourcade, Poremba], A1114

association of airway obstruction, hypoxemia, and postoperative apnea in preterm infants [Kurth, LeBard, Downes], A1131

bilateral single lung transplantation: anesthetic management and intraoperative considerations [Triantafillou, Heerdt, Herbst, Pond, Despotis], A90

blood glucose levels and current pediatric guidelines [Hongnait, Murat, Mathey, Saint-Maurice], A1092

- breathing circuit related respiratory effort in infants recovering from respiratory failure [Räsänen, Leijala], A225
- cardiovascular responses during desflurane anesthesia in infants and children [Taylor, Lerman, Sikich, Shandling], A1104
- caudal epidural anesthesia in sixty-nine conscious premature and high-risk infants [Gunter, Dunn, Bower, Ternberg], A1097
- cerebral autoregulation during cardiopulmonary bypass is temperature dependent in infants [Taylor, Burrows, Bissonnette], A72
- cerebral blood flow and metabolism are independent of pump flow rate during hypothermic cardiopulmonary bypass in children [Kern, Greeley, Ungerleider, Quill, Baldwin, Smith, Reves], A1107
- cerebral hemodynamics during hypothermic low flow bypass [Pilato, Hickey], A1244
- comparative cardiovascular depression of halothane in neonates and infants [Murray, Forbes, Mahoney], A1132
- continuous epidural bupivacaine-fentanyl infusions in children following ureteral reimplantation [Berde, Sethna, Yemen, Pullerits, Miler], A1128
- continuous epidural infusion of 1/6% bupivacaine for postoperative pain relief in pediatric urology patients [Bires, McGregor], A1108
- continuous noninvasive assessment of brain oxygenation and blood volume during cardiopulmonary bypass in children undergoing ASD closure [Steven, Kurth, Nicolson, Phoon, Chance], A457
- continuous transtracheal Doppler cardiac output determination in pediatric patients: correlation with transthoracic continuous wave Doppler cardiac output [Newman, Sanders, McCurnin, Martin, Morrow], A1126
- cricoid pressure prevents gaseous distention of stomach during manual inflation of lungs in infants [Feld, Archer, Kreitzman, Brock-Utne], A1090
- differential rate of recovery of neuromuscular function in adductor pollicis and flexor hallucis after vecuronium [Brandom, Stiller, Cook, Scierka], A1113
- disposition and respiratory effects of intrathecal morphine in children [Nichols, Yaster, Deshpande, Helfaer, Lynn, Bezman, Tobias], A1135
- distribution of self-administered morphine and meperidine into human breast milk: acute neonatal neurobehavioral effects [Wittels, Scott, Sinatra], A921
- does anemia increase risk of postoperative apnea in former preterm infants? [Welborn, Hannallah, Higgins, Fink, Luban], A1091
- does isoflurane affect cerebrovascular response to carbon dioxide in anesthetized children? [Leon, Bissonnette, Lerman], A1221
- does liquid crystalline temperature monitoring estimate core temperature in anesthetized children? [Leon, Bissonnette, Lerman], A419
- does nitrous oxide affect cerebral blood flow velocity under neurolept anesthesia in children? [Leon, Bissonnette], A389
- drinking before discharging children from day surgery: is it necessary? [Martin, Whitney, Seidl-Friedman, Nicolson, Schreiner], A1122
- effect of concomitant analgesic therapy on awakening concentration of halothane in children [Watcha, Lagueruela, White], A1099
- effect of extracorporeal membrane oxygenation on cerebral blood flow autoregulation in newborn lamb [Bender, Short, Walker, Jones, Traystman], A1226
- effect of MAST on intracranial pressure in children [Meyer, Jayais, Quenet, Barrier], A1100
- effects of alfentanil on intracranial pressure in children undergoing ventriculo-peritoneal shunt revision [Markovitz, Cohen, Duhaime, Sutton], A213
- effects of cardiopulmonary bypass on alfentanil pharmacokinetics and protein binding in infants and children [Davis, Stiller, Cook], A1120
- effects of inferior vena cava clamping on renal perfusion pressure during pediatric liver transplantation [Belani, Estrin], A1134
- effects of vecuronium on flexor hallucis brevis compared with adductor pollicis in anesthetized children [Brandom, Georgiu, Cook], A1112
- efficacy and safety of low-dose caudal morphine for postoperative analgesia in infants and young children [Savarese, McGowan, Oh, O'Connor], A1129
- emergence respiratory complications in children: a comparison between halothane and isoflurane in children extubated deep or awake [Pounder, Blackstock, Steward], A1095
- enoximone: a new therapeutic concept in right ventricular repair in pediatric surgery [Jayais, Mauriat, Pouard, Journois], A1238
- epinephrine and caudal epidural anesthesia in infants: onset, duration, and hemodynamic effects [Gunter, Dunn, Bower, Ternberg], A1098
- evaluation of adolescents' preference and perception of anesthesia induction [Cohen, Atkins, Hannallah], A1121
- evaluation of brain oxygenation during cardiopulmonary bypass and total circulatory arrest in children by near infrared spectroscopy [Bracey, Greeley, Greibel, Kern, Ungerleider, Reves, Piantadosi], A1109
- halothane concentration blocking cardiovascular responses to incision in infants and children [Ishizawa, Dohi], A1116
- hemodilation for heart surgery in children [Rosen, Rosen, Bove, Callow, Wilton], A1242
- hemodynamic alterations during autologous blood donation for children in severe cyanotic heart disease [Gombotz, Stein, Suppan, Metzler, Beitzke], A1118
- impaired calcium mobilization in children undergoing cardiopulmonary bypass [Robertie, Butterworth IV, Dudas, Ward, Zaloga], A1137
- improved automated noninvasive blood pressure monitoring in infants [Siker, Proctor], A1130
- inadvertent endobronchial intubation in pediatric anesthesia: a prospective study [Rolf, Cote], A461
- incidence of anesthetic cardiac arrest in infants: effect of pediatric anesthesiologists [Keenan, Shapiro, Dawson], A1045
- incidence of bloody taps during pediatric caudal blockade [van Obbergh, Veyckemans, Gouverneur], A1236
- incidence of hypoxemic events during anesthesia in children with upper respiratory infection [Rolf, Cote], A1124
- induction and recovery characteristics of desflurane in infants and children [Taylor, Lerman, Sikich, Shandling], A1246
- influence of head circumference and probe configuration on optical pathlength of light through head as assessed by phase-modulation spectroscopy in children [Steven, Kurth, Benaron, Chance], A471
- intraocular pressure changes after tracheal intubation in children [Watcha, White, Chu, Stevens], A1096
- intraoperative and postoperative analgesia in children undergoing inguinal herniorrhaphy: comparison of caudal bupivacaine 0.125% and 0.25% [Rice, Binding, Vaughn, Thompson, Newman], A3
- intraoperative echocardiography in children with congenital cardiac shunt lesions: comparison of transesophageal and epicardial echocardiography [Muhiudeen, Roberson, Silverman, Turley, Haas, Corver, Cahalan], A103



- intraoperative echocardiography in infants and children with regurgitant valvar lesions: comparison of TEE and epicardial echocardiography [Muhiudeen, Roberson, Silverman, Turley, Haas, Corver, Cahalan], A104
- intravenous lidocaine does not prevent postoperative vomiting in pediatric strabismus patients [Woelfel], A7
- isoproterenol for test-dosing in pediatric regional blockade [Perillo, Sethna, Berde], A1127
- is Relaxograph a reliable pediatric monitor of neuromuscular transmission? [Werner], A913
- lung mechanics and airway pressure transmission in infants after open-heart surgery [Räsänen, Peltola, Leijala], A285
- methods-comparison study of acceleration, EMG and force responses during recovery from non-depolarizing block in children [Werner], A912
- midazolam pharmacokinetics in children after intranasal administration [Malinovsky, Le Normand, de Dieuleveult, Lepage, Cozian], A388
- nitrous oxide does not increase postoperative nausea/vomiting in pediatric outpatients undergoing tonsillectomy-adenoidectomy [Pandit, Pryn, Randel, Levy, Lewis], A1245
- optimum concentration of bupivacaine for balanced general/caudal anesthesia in children [Gunter, Dunn, Bennie, Pentecost, Bower, Ternberg], A1237
- oral midazolam premedication: optimal timing and effect of atropine [Weldon, Watcha, White], A1243
- patient-controlled analgesia in children and adolescents: a randomized comparison with intramuscular morphine [Berde, Yee, Lehn, Moore, Sethna], A1102
- pediatric airway pressure release ventilation [Martin, Rafferty, Bilenki, Wetzell], A1133
- perioperative effect of anesthesia on superoxide production in neonates and infants [Mikawa, Maekawa, Obara, Uetani, Nakamura], A1093
- pharmacodynamics of high dose vecuronium in children during balanced anesthesia [Sloan, Bissonnette, Lerman], A1103
- plasma glucose concentrations in anesthetized children during administration of lactated Ringer's and 5% dextrose in lactated Ringer's [Liu, McCann, Lum, Rivard], A1136
- postductal hypoxemia is associated with plasma eicosanoids in neonates with congenital diaphragmatic hernia [Nakayama, Evans, Motoyama], A1240
- predicting hypoxemia during one-lung ventilation [Slinger, Suissa, Adam, Triolet], A1170
- predictors of post-extubation stridor in pediatric trauma patients [Bishop, Kemper, Benson], A229
- prevention of venous air embolism in pediatric neurosurgical procedure by using MAST [Meyer, Jayais, Quenet, Barrier], A1101
- pulmonary effects of preoperative extracorporeal membrane oxygenation in congenital diaphragmatic hernia [Nakayama, Motoyama, Smith, Tagge], A1241
- rectal ketamine vs. intranasal ketamine as premedicants in children [Tsai, Mok, Lippmann], A1094
- relation of acid base status to ionized calcium during pediatric liver transplant [Goldman, Vazquez, Jara, Polo, Cruz], A234
- respiratory complications and hypoxic episodes during induction with isoflurane in children: effect of induction technique [Warde, Nagi, Raftery], A1119
- single-blind study of combined pulse oximetry and capnography in children [Rolf, Cote, Liu, Gousouzian, Ryan], A1125
- small volume hypertonic NaCl resuscitation in pediatric hemorrhage model [Ramamoorthy, Rooney, Wat, Kalatheeviti, Mathru, Rao], A1111
- spontaneous minute ventilation during halothane anaesthesia in infants and children [Brown, Bissonnette, Holtby, Gerus, Macpherson, Ein, Shandling], A1105
- stress of spontaneous breathing in children recovering from open heart surgery [Räsänen, Puhakka], A309
- stress responses in children undergoing open heart surgery [Vitkun, Scott, Backus, LaGade, Poppers], A1110
- study of biochemical changes following succinylcholine administration in children with strabismus [McLoughlin, Mirakhur, Trimble, McCarthy, Elliott], A897
- sufentanil and fentanyl anesthesia for adenotonsillectomy in pediatric patients [Spence, Pinto, Lyew, Henderson], A1115
- thiamylal requirements for induction of anesthesia in unpremedicated adolescents [Cohen, Hannallah, Ahlstrom], A41
- thyroid function on ECMO [Schwartz, Fackler], A310
- total intravenous anesthesia with propofol and without intubation for magnetic resonance imaging in pediatric patients [Vangerven, Wouters, Vandermeersch, Van Aken], A1239
- use of Hudson's Mask for short ophthalmological procedures in children results in low complication rate [Susman, Shah], A37
- vital capacity rapid inhalation induction with desflurane [Hartman, Kelly, Embree, Artusio], A20
- preoperative**
- correlation between two physical status measures and ASA physical status score [Coalson, Roizen, Apfelbaum, Rupani, Roberts, Finn, Schreider, Lichtor, Uitvlugt, Thisted], A1253
- does short-term use of automated device for preoperative test selection affect physicians' test-ordering habits? [Hung, Lin, Roizen, Apfelbaum, Thistead, Coalson, Lichtor, Finn, Rupani], A1018
- effectiveness of preanesthetic instructions on postoperative physiological recovery [Bennett, Disbrow], A1055
- how frequently do asymptomatic patients benefit from pursuit of abnormalities in their preoperative test results? [Apfelbaum, Roizen, Robinson, Murray, Grogono, Duke, Kim, Roberts, Rupani, Texidor, Gronert, White, Poler, Coalson, Youngberg, Dionne, Stocking, Thisted], A1254
- preoperative concerns of parents whose children are admitted thru ambulatory surgical unit [Rypel, Guertin, Cartabuke, Nouri, Howie], A1084
- project pearls: a methodology to enhance information transfer from a preanesthetic evaluation clinic to surgical suite [Larkin, Griffith, Wallace, Lumb], A1034
- thoracic**
- analgesic effect of epidurally administered sufentanil during thoracotomies: comparison with bupivacaine and saline [Haak-van der Lely, van Kleef, Gesink-van der Veer, Burm, Bovill], A770
- anesthetic management of mediastinal masses revisited [Fisher, Alagesan, Bedford, Burt], A1079
- epidural vs. intravenous fentanyl infusions in postthoracotomy patients: respiratory effects [Stringer, Sandler, Panos, Badner, Lawson, Friedlander], A781
- intrapleural analgesia with bupivacaine following thoracotomy is inefficient: results of controlled study and pharmacokinetics [Elman, Debaene, Orhant, Metrot, Murciano], A767
- intrapleural bupivacaine vs. saline placebo after thoracotomy [McEllistrem, Hurley, O'Toole, Chambers, Keane], A759
- intrathecal morphine reduces post thoracotomy meperidine requirements [Cohen, Neustein, Ali, Thys], A801
- postoperative pain management and pulmonary function after thoracotomy: prospective randomized study [Miguel, Hubbell], A777
- predicting hypoxemia during one-lung ventilation [Slinger, Suissa, Adam, Triolet], A1170

- prostaglandin E<sub>1</sub>, nitroprusside and pulmonary blood flow distribution during one lung ventilation in dog [Heerdt], A599
- urologic**
- continuous epidural bupivacaine-fentanyl infusions in children following ureteral reimplantation [Berde, Sethna, Yemen, Pullerits, Miler], A1128
  - continuous epidural infusion of 1/2% bupivacaine for postoperative pain relief in pediatric urology patients [Bires, McGregor], A1108
  - dilutional hyponatremia associated with glycine irrigation in intrauterine endoscopic surgery [Maroun, Zayneh, Bryssine, Bouletreau], A1051
  - recovery room morbidity and mortality associated with renal extracorporeal shock wave lithotripsy [Kovac, Mangold], A1060
- Anesthesia circuits. See under Equipment**
- Anesthesia machines. See under Equipment**
- Anesthesia records. See Records, anesthesia**
- Anesthesiologists**
- anesthesia: a survey of 800 patients' knowledge, attitudes and concerns [Shevde, Panagopoulos], A1005
  - antimicrobial therapy and [Cheng], A1043
  - controlled study on cognitive and performance impacts of sleep deprivation in [Zelcer, Manton, Paul], A1065
  - correlation between two physical status measures and ASA physical status score [Coalson, Roizen, Apfelbaum, Rupani, Roberts, Finn, Schreider, Lichtor, Uitvlugt, Thisted], A1253
  - current perceptions of medical students on anesthesiology as a career [Schulte, Block Jr., McDonald], A1048
  - effect of outcome on physician judgments of appropriateness of care [Caplan, Posner, Cheney], A1247
  - evaluation of present check-out methods and a test of validity of FDA checklist for use by [March, Crowley], A1020
  - faculty advisors: mentors: role models? employment counselors? [Rosenberg, Horrow, Polonsky], A1036
  - have they implemented infection control precautions? [Rosenberg, Bernstein, Ramanathan], A1015
  - measuring mental workload of [Gaba, Lee], A1027
  - patterns of epidural steroid use by, in Illinois [Shulman, Ivankovich, Ivankovich], A1263
  - personal attributes related to superior performance in anesthesiology [McDonald, Gough, Bradley], A1050
  - physician payment reform: an anesthesiology case study [Orkin, Revicki, Luce, McMenamin, Weschler], A01023
  - prospective analysis of reported significant observations during anesthesia [Chopra, Bovill, Spierdijk, Koornneef], A1248
  - quality assurance in infection control [Greene], A1061
  - role of experience in response to simulated critical incidents [DeAnda, Gaba, Lee], A1085
  - should preoperative EKGs be officially interpreted by cardiologists prior to anesthesia? [Wolman, Lasecki, Shapiro, Porter, Kane], A1026
  - simple, reliable, inexpensive method to aid in detection of diversion of controlled substances by operating room personnel [Donnelly, Petryna, Newman, Ivankovich], A1053
  - standardized drug trays and carts in anesthesiology [Christie], A1019
  - start date of anesthesiology training: effect on academic and clinical performance [Furgerson, Rhoton], A1056
  - attending, stress in [Bitetti, Hartwell, Chin, Lichtmann, Naulty], A1004
  - task analysis/workload of, performing general anesthesia [Dallen, Nguyen, Zornow, Weinger, Gaba], A498
  - utilization of muscle relaxants: a cost analysis [Brown, Lichtenthal], A1088
- Anesthetic action theories. See Theories of anesthetic action**
- Anesthetic potency. See Potency, anesthetic**
- Anesthetics. See also under Heart; Measurement techniques**
- Anesthetics, gases**
- nitrous oxide**
- additive contribution of, to halothane MAC in infants and children [Murray, Mehta, Forbes, Dull], A1235
  - and coronary artery constriction in pigs [Pettis, Sill, Bertha, Witzeling, Rorie], A553
  - coronary microvessel diameters and coronary hemodynamics during, in dogs [Vollmar, Conzen, Habazettl, Adili, Peter, Brendel], A565
  - could teratogenicity of, in rats be due to its sympathomimetic action on embryo? [Fujinaga, Baden], A354
  - does it affect cerebral blood flow velocity under neurolept anesthesia in children? [Leon, Bissonnette], A389
  - does not increase postoperative nausea/vomiting in pediatric outpatients undergoing tonsillectomy-adenoidectomy [Pandit, Pryn, Randel, Levy, Lewis], A1245
  - effect of, on ICP following cranial-dural closure [Hemstad, Domino, Lam, Laohaprasin, Slee, Grady, Winn], A177
  - effect of, on vitamin B<sub>12</sub> and folate metabolism in patients [Koblin, Tomerson, Waldman, Lampe], A322
  - effects of, and/or halothane on cleavage rate during general anesthesia for oocyte retrieval [Palot, Visseaux, Harika, Carre-Pigeon, Rendoing], A930
  - effects of, on contractility and relaxation of isolated mammalian ventricular myocardium [Carton, Wanek, Housmans], A1271
  - effects of, on ventilatory response to sustained hypoxia in man [Dahan, Ward], A1168
  - fentanyl with, does not alter cerebral autoregulation or blood flow compared to unanesthetized rats [Hoffman, Werner, Segil, Edelman, Miletich], A603
  - hyperbaric, in rats for MAC determination [Russell, Graybeal], A399
  - interaction of fentanyl and, on cerebral and peripheral hemodynamics in newborn lambs [Yaster, Koehler, Traystman], A1117
  - myocardial depression by, mechanism of action [Caron, Wanek, Housmans], A575
  - preventive effects of phenoxybenzamine on reproductive toxicity induced by, in sprague-dawley rats [Fujinaga, Baden, Suto, Myatt, Mazze], A920
  - reduction of post-surgical nausea and vomiting in patients receiving [Sacco, Grant, Luthringer, London, Kamps], A15
  - stimulates expiratory muscles in dogs [Warner, Joyner, Loeffler, Rehder], A1172
- Anesthetics, intravenous**
- alfentanil**
- comparison of midazolam and propofol in combination with, for total intravenous anesthesia [Vuyk, Hennis, Burm, de Voogt, Spierdijk], A325
  - effects of, on intracranial pressure in children undergoing ventriculo-peritoneal shunt revision [Markovitz, Cohen, Duhaime, Sutton], A213
  - effects of cardiopulmonary bypass on pharmacokinetics of, and protein binding in infants and children [Davis, Stiller, Cook], A1120
  - high dose, increased muscle tone from, is peripheral effect [Huang], A351
  - high dose, midazolam infusion modifies pre-bypass hemodynamics under [Schlumberger, Cedda, Raffin, Dubois, Fischler], A153

- human liver metabolism of, inhibited by medetomidine stereoisomers [Kharasch, Hill, Eddy], A379
- ketamine vs., sedation-analgesia for outpatient lithotripsy [Monk, Rader, Boure, White], A8
- programmed infusion of, based on lean body mass [Crankshaw, Morgan, Beemer, Karasawa], A332
- transdermal scopolamine does not decrease incidence of nausea and vomiting following [Bosek], A371
- benzodiazepines**
- propofol vs. benzodiazepines for sedation during endoscopy [Pizzirani, Pucciarelli, Pigato, Rizzoli, Marcassa], A32
- serum concentrations of midazolam and anesthetic efficacy [Inagaki, Sumikawa, Fukumitsu, Yoshikawa, Yoshiya], A323
- diazepam**
- effect of anesthetics injected into vertebral artery before and after hemorrhage and pericardial tamponade [Liao], A402
- etomidate**
- anesthesia for pediatric cancer patients: ketamine, propofol or? [Barst, McDowall, Pratila, Scher, Shah, Alagesan, Lafourcade, Poremba], A1114
- comparative dose response cardiac effects of thiopental, ketamine, propofol and, in perfused, isolated guinea pig hearts [Stowe, Peller, Buljubasic, Marijic, Kampine, Bosnjak], A589
- comparison of intraoperative course and recovery following anesthesia with propofol or, in patients over 80 years [Servin, Pommereau, Rowan, Nimier, Desmonts], A318
- effect of, on transcranial magnetic-induced motor evoked potentials in primates [Ghaly, Stone, Kartha, Jaster, Aldrete], A746
- effect of flumazenil on anesthesia induced by flunitrazepam, ketamine, thiopental or [Mok, Steen, Wei, Cheng], A134
- induction of, maintains sympathetic outflow in humans: direct observations from sympathetic recordings [Ebert, Kanitz, Berens, Kampine], A342
- inotropic effect of, on cardiac papillary muscle in normal and cardiomyopathic hamsters [Riou, Lecarpentier, Viars], A647
- modifies hemodynamic response to high dose fentanyl induction in patients with poor left ventricular function: randomized study [Schlumberger, Cedda, Raffin, Dubois, Fischler], A152
- fentanyl**
- amnesia and unconsciousness with rigidity induced by, in human volunteers: incidence, duration and associated plasma levels [Streisand, Ashburn, Bailey, Tarver, Le Maire], A368
- effects of, on pulmonary resistive properties: an occlusion method study [Cohendy, Iracine, Rebiere, Calvet, Eledjam], A1148
- fentanyl-induced temporal lobe seizure activity recorded with epidural (including perihippocampal) electrodes [Tempelhoff, Bernardo, Modica, Edwards], A168
- fentanyl-midazolam anesthesia for cardiac surgery and postoperative care: comparison of bolus vs. combined infusion techniques [Sladen, Berend, Lu, Hodgins, Yevak], A268
- hemodynamic response to induction of intravenous anesthesia supplemented with pentamorphine or [Varlotta, Robertson], A56
- hemodynamic stability and thiopental, ketamine, thiopental/fentanyl and ketamine/fentanyl anesthetic induction [Katz, Alexander], A324
- high dose induction of, etomidate modifies hemodynamic response to, in patients with poor left ventricular function: randomized study [Schlumberger, Cedda, Raffin, Dubois, Fischler], A152
- interaction of nitrous oxide and, on cerebral and peripheral hemodynamics in newborn lambs [Yaster, Koehler, Traystman], A1117
- influence of halothane and, on time course of pulmonary blood flow redistribution during one lung ventilation [Heerdt, Blessios], A741
- with nitrous oxide does not alter cerebral autoregulation or blood flow compared to unanesthetized rats [Hoffman, Werner, Segil, Edelman, Miletich], A603
- mid-latency auditory evoked potentials and intraoperative wakefulness during general anesthesia (GA) with propofol, isoflurane, and flunitrazepam/fentanyl [Schwender, Madle, Keller, Poppel], A180
- pharmacokinetics of sufentanil and, after a long duration infusion [Cathelin, Levron, Maroudy, Andrieu, Viars], A390
- rCBF and formation of brain edema in presence of a focal lesion: influence of isoflurane, thiopental or [Murr, Schurer, Berger, Baethmann, Enzenbach, Peter], A566
- scimed oxygenator and uptake of [Rosen, Rosen, Leong], A449
- sufentanil and, for adenotonsillectomy in pediatric patients [Spence, Pinto, Lyew, Henderson], A1115
- flunitrazepam**
- effect of flumazenil on anesthesia induced by ketamine, etomidate, thiopental or [Mok, Steen, Wei, Cheng], A134
- mid-latency auditory evoked potentials (MLAEP) and intraoperative wakefulness during general anesthesia (GA) with propofol, isoflurane, and flunitrazepam/fentanyl [Schwender, Madle, Keller, Poppel], A180
- ketamine**
- anesthesia for pediatric cancer patients: etomidate propofol or [Barst, McDowall, Pratila, Scher, Shah, Alagesan, Lafourcade, Poremba], A1114
- comparative dose response cardiac effects of thiopental, etomidate, propofol and, in perfused, isolated guinea pig hearts [Stowe, Peller, Buljubasic, Marijic, Kampine, Bosnjak], A589
- direct and indirect effects of, on mammalian ventricular myocardium [Cook, Caron, Housmans], A617
- does not reduce infarct volume in rats undergoing focal cerebral ischemia [Warner, Ridenour, Todd, Ramani, McAllister], A727
- effect of anesthetics injected into vertebral artery before and after hemorrhage and pericardial tamponade [Liao], A402
- effect of flumazenil on anesthesia induced by flunitrazepam, etomidate, thiopental, or [Mok, Steen, Wei, Cheng], A134
- effect of halothane and, on splanchnic circulation in pig [Loick, Tokyay, Herndon], A607
- effects of thiopental and, on myocardial contractility and function in hypovolemic swine [Silverman, Ward, Kingsley, Williams, Farooqui], A65
- enhanced expression of proto-oncogene C-FOS protein in rats given [Mueller, Gillam, Grimes, Breese], A724
- hemodynamic stability and thiopental, thiopental/fentanyl, ketamine/fentanyl and, anesthetic induction [Katz, Alexander], A324
- inotropic effect of, on cardiac papillary muscle in normal and cardiomyopathic hamsters [Riou, Lecarpentier, Viars], A555
- oxygenation of porcine gut is reduced by halothane but is maintained by [Tokyay, Loick, Stothert, Jr., Traber, Herndon], A312
- rectal vs. intranasal, as premedicants in children [Tsai, Mok, Lippmann], A1094
- sedation-analgesia for outpatient lithotripsy: alfentanil vs. [Monk, Rader, Boure, White], A8
- sufentanil decreases EEG spectral edge frequency more than, during hypothermic cardiopulmonary bypass [Silvay, Salter, Ostapovich, Reich, Zappulla], A201

**methohexital**

propofol vs., for electroconvulsive therapy [Mokriski, Nagle, Papuchis, Waxman, Cohen, Wagner], A172

**midazolam**

aging increases sensitivity to [Marty, Reves, Croughwell, Goodman, White, Smith, Jacobs], A358

amnesia: correlation with high-frequency EEG power [Veselis, Reinsel, Heino, Alagesan, Bedford], A186

cognitive mechanism of amnesia produced by [Veselis, Reinsel, Alagesan, Heino, Bedford], A189

for coinduction of thiopental anesthesia in patients [Vinik, Bradley Jr., Kissin], A1216

comparison of propofol and, in combination with alfentanil for total intravenous anesthesia [Vuyk, Hennis, Burm, de Voogt, Spierdijk], A325

comparison of propofol and midazolam-propofol for outpatient anesthesia: recovery characteristics [Petit, Narchi, Legendre, Benhamou], A31

differential effects of, on inspiratory muscles [Molliex, Dureuil, Desmonts], A1145

EEG effects during 'steady state' infusion of, development of acute tolerance? [Breimer, Burm, Danhof, Hennis, Spierdijk], A1213

effect of flumazenil and, on activity of cardiac sympathetic branch [Kimura, Shitaokoshi, Komatsu, Takezawa, Shimada], A397

effects of anesthetic induction dose of, on motor evoked potentials in primates [Ghaly, Kartha, Stone, Miles, Aldrete], A747

endotracheally-administered, anticonvulsant and pulmonary effect of, in a model of status epilepticus [Rothenberg, Jones, Dainauskas, McCarthy], A233

fentanyl-midazolam anesthesia for cardiac surgery and postoperative care: comparison of bolus vs. combined infusion techniques [Sladen, Berend, Lu, Hodgins, Yevak], A268

flumazenil after sufentanil-midazolam anesthesia [Isner, Cork, Scipione], A53

frontal lead is sufficient to monitor EEG effects of [Veselis, Reinsel, Alagesan, Heino, Bedford], A197

infusion of, modifies pre-bypass hemodynamics under high dose alfentanil anesthesia [Schlumberger, Ceddaha, Raffin, Dubois, Fischler], A153

infusion of, vs. infusion of propofol, for sedation in ICU following coronary artery surgery [Roekaerts, Huygen, deLange], A227

pharmacokinetic-pharmacodynamic modeling of interaction between flumazenil and, with aperiodic EEG analysis in volunteers [Breimer, Burm, Hennis, Danhof, Bovill], A195

pharmacokinetics of, in children after intranasal administration [Malinovsky, Le Normand, de Dieuleveult, Lepage, Cozian], A388

propofol vs., for sedation: comparison of recovery parameters [Pratila, Fischer, Alagesan, Alagesan, Reinsel, Pratilas], A4

serum concentrations of, and anesthetic efficacy [Inagaki, Sumikawa, Fukumitsu, Yoshikawa, Yoshiya], A323

slow injection does not prevent ventilatory depression induced by [Alexander, Teller, Gross], A1147

slow injection of, does not reduce risk of hypoxia [Teller, Alexander, Gross], A1251

**propofol**

allows intubation without relaxants [Kallar], A22

anesthesia for pediatric cancer patients: ketamine, etomidate or? [Bart, McDowall, Pratila, Scher, Shah, Alagesan, Lafourcade, Poremba], A1114

antiemetic action of ranitidine in outpatient laparoscopy under propofol-isoflurane anesthesia [Kraynack, Bates], A14

benzodiazepines vs., for sedation during endoscopy [Pizzirani, Pucciarelli, Pigato, Rizzoli, Marcassa], A32

chest wall mechanics during, [Fierobe, Cantineau, Pandeale, Desmonts], A1144

comparative dose response cardiac effects of thiopental, etomidate, ketamine and, in perfused, isolated guinea pig hearts [Stowe, Peller, Buljubasic, Marijic, Kampine, Bosnjak], A589

comparison of intraoperative course and recovery following anesthesia with etomidate or, in patients over 80 years [Servin, Pommereau, Rowan, Nimier, Desmonts], A318

comparison of midazolam and, in combination with alfentanil for total intravenous anesthesia [Vuyk, Hennis, Burm, de Voogt, Spierdijk], A325

comparison of midazolam-propofol and, for outpatient anesthesia: recovery characteristics [Petit, Narchi, Legendre, Benhamou], A31

comparison of thiopental-isoflurane-N<sub>2</sub>O, propofol-N<sub>2</sub>O, and, for neuroanesthesia [Van Hemelrijck, Tempelhoff, Jellish, White], A167

cutaneous anesthesia: effects of, on non-noxious responses of spinal dorsal horn neurons in cats [Uchida, Collins, Kishikawa, Iwasaki], A697

decreases voltage activated calcium currents in rabbit heart myocytes [Wegrzynowicz, Matsuda, Volk, Shibata, Wachtel], A592

does it sensitize heart to epinephrine? [Kamibayashi, Sumikawa, Yamatodani, Hayashi, Yoshiya], A562

dose-related changes in CBF and CMRO<sub>2</sub> during infusions of, in rabbits [Ramani, Todd, Warner], A703

EEG for determining requirement of, during neuroanesthesia [Van Hemelrijck, Tempelhoff, Jellish, White], A202

effect of, on hepatic blood flow [Diedericks, Sear, Foex], A624

effects of, on cerebral and spinal cord blood flow autoregulation in rats [Werner, Hoffman, Segil, Miletich, Albrecht], A694

effects of, on cerebral blood flow in correlation to cerebral blood flow velocities in dogs [Werner, Hoffman, Kochs, Albrecht, Schulte am Esch], A556

effects of, on contractile state of isolated rabbit papillary muscles under various stimulation conditions [Rusy, Thomas-King, King, Komai], A560

effects of, on coronary circulation and myocardial performance of isolated rabbit heart [Baron, Soughir, Arthaud, Mouren, Viars], A561

effects of, on function of normal, collateral dependent and ischemic myocardium [Mayer, Weinstable, Legat, Zimpfer], A569

effects of, on mitochondrial oxidative phosphorylation in rat liver [Bendriss, Nelson, Dabadie, Mazat], A687

effects of, on neurologic outcome from incomplete cerebral ischemia in rat [Kochs, Hoffman, Werner, Albrecht, Schulte am Esch], A719

effects of, sedation on common laboratory measurements [Pearson, Kruse, Demettrion], A299

effects of EEG and relationship with plasma concentration during neurosurgery [Bendriss, Stoiber, Bendriss-Brusset, Dabadie, Erny], A203

evaluation of outpatients receiving, or other anesthetic agents for extracorporeal shock wave lithotripsy (ESWL): quality assurance analysis [Jahr, Texidor, Kuchta, Kelley], A30

extrahepatic metabolism of: an evidence [Veroli, O'Kelly, Bertrand, Trouvin, Farinotti, Ecoffey], A329

impact of, on intracranial dynamics in head trauma ICU patients [Weinstabl, Mayer, Plattner, Spiss, Hammerle], A1217

- infusion of, vs. infusion of midazolam for sedation in ICU following coronary artery surgery [Rockaerts, Huygen, deLange], A227
- inhibition of sympathetic neural outflow contributes to hypotension during, induction in humans [Berens, Ebert, Kampine], A343
- inotropic and electrophysiological effects of, on isolated ventricular myocardium [Roewer, Winguth, Proske, Dziadzka, Schulte am Esch], A381
- methohexital vs., for electroconvulsive therapy [Mokriski, Nagle, Papuchis, Waxman, Cohen, Wagner], A172
- mid-latency auditory evoked potentials and intraoperative wakefulness during general anesthesia with isoflurane, flunitrazepam/fentanyl and [Schwender, Madle, Keller, Poppel], A180
- midazolam vs., for sedation: comparison of recovery parameters [Pratila, Fischer, Alagesan, Alagesan, Reinsel, Pratilas], A4
- negative inotropic effects of, vs. thiopental: assessment in isolated ventricular septum model [Lin, Lee, Lee, Virtusio, Wu], A564
- paracervical blockade vs., for outpatient legal abortion [Raeder], A25
- spontaneous movements and,; an EEG study [Borgeat, Dessibourt, Popovic, Schwander], A194
- study of vecuronium-propofol interaction [McCarthy, Pandit, McLoughlin, Mirakhur, Clarke], A899
- thiopental, and contractile responses in isolated pig coronary arteries and cultured vascular smooth muscle cells [Ozhan, Sill, Katusic, Rorie, Uhl], A583
- tolerance and hyperlipemia during long-term sedation with [Boyle, Shear, Whie, Schuller], A245
- total intravenous anesthesia with, and without intubation for magnetic resonance imaging in pediatric patients [Vangerven, Wouters, Vandermeersch, Van Aken], A1239
- steroid**
- 5 $\alpha$ -pregnane-3 $\alpha$ -OL-20-ONE identified as active molecular species of, in brain [Krieger, Mok, Herschkowitz], A704
- sufentanil**
- cerebral blood flow velocity and intracranial pressure response to,; a dose response study [Slee, Lam, Winn], A176
- CP50 for [Glass, Doherty, Jacobs, Goodman, Reves], A378
- decreases EEG spectral edge frequency more than ketamine during hypothermic cardiopulmonary bypass [Silvay, Salter, Ostapovich, Reich, Zappulla], A201
- effects of, on CBF, CMRO<sub>2</sub> and cerebral blood flow velocity in dogs [Werner, Hoffman, Miletich, Albrecht, Schulte am Esch], A513
- fentanyl and, for adenotonsillectomy in pediatric patients [Spence, Pinto, Lyew, Henderson], A1115
- flumazenil after sufentanil-midazolam anesthesia [Isner, Cork, Scipione], A53
- pharmacokinetics of fentanyl and, after long duration infusion [Cathelin, Levron, Maroudy, Andrieu, Viars], A390
- priming dose of pancuronium does not attenuate chest wall rigidity from [Abrams, Horrow, Storella, Van Riper, Lambson, Rawa], A148
- pulmonary retention of, in lungs [Boer, Burm, Bovill, Mooren], A319
- reduces all components of heart rate variability [Latson, Martin, Whitten, Klein, Elmore], A373
- thiamylal**
- requirements for induction of, in unpremedicated adolescents [Cohen, Hannallah, Ahlstrom], A41
- thiopental**
- attenuates anoxia-induced Na and K concentration changes in rat hippocampal slice [Abramowicz, Kass, Cottrell], A685
- comparative dose response cardiac effects of thiopental, etomidate, ketamine, propofol and, in perfused, isolated guinea pig hearts [Stowe, Peller, Buljubasic, Marijic, Kampine, Bosnjak], A589
- EEG as measure of anesthetic depth of, [Hung, Varvel, Shafer, Stanski], A391
- effect of anesthetics injected into vertebral artery before and after hemorrhage and pericardial tamponade [Liao], A402
- effect of flumazenil on anesthesia induced by flunitrazepam, ketamine, etomidate or [Mok, Steen, Wei, Cheng], A134
- effect on cerebral blood flow during carotid endarterectomy [Young, Prohovnik, Ostapovich, Correll, Ornstein], A170
- effects of d-tubocurarine and, alone and combined, at neuromuscular junction [Bhattacharyya, Sokoll, Davies, Zwagerman], A869
- effects of ketamine and, on myocardial contractility and function in hypovolemic swine [Silverman, Ward, Kingsley, Williams, Farooqui], A65
- hemodynamic stability and ketamine, thiopental/fentanyl, ketamine/fentanyl and, anesthetic induction [Katz, Alexander], A324
- midazolam for coinduction of, in patients [Vinik, Bradley Jr., Kissin], A1216
- MK 801 markedly reduces requirements of halothane and, in rats [Mantz, Desmots], A672
- negative inotropic effects of propofol vs.,; assessment in isolated ventricular septum model [Lin, Lee, Lee, Virtusio, Wu], A564
- propofol and, contractile responses in isolated pig coronary arteries and cultured vascular smooth muscle cells [Ozhan, Sill, Katusic, Rorie, Uhl], A583
- rCBF and formation of brain edema in presence of a focal lesion: influence of isoflurane, fentanyl or [Murr, Schurer, Berger, Baethmann, Enzenbach, Peter], A566
- transport of, across perfused human placenta [Herman, Downing, Johnson, Knape, Schenker], A973
- Anesthetics, local. See also under Toxicity**
- benzonatate**
- evaluation of Tessalon perles for topical oropharyngeal anesthesia [Mongan, Culling], A810
- bupivacaine**
- cardiovascular and central nervous system effects of CO-administered lidocaine and, in piglets [Kyta, Heavner, Badgwell, Rosenberg], A756
- comparison of 0.75% ropivacaine and 0.75% bupivacaine for epidural anesthesia [Concepcion, Steele, Bader, Arthur], A792
- differential sensitivity of synaptic components to local anesthetics [Tabtabai, Booth], A789
- effects of ropivacaine, lidocaine, and, upon isolated spontaneously beating rabbit heart [Feldman, Pitkanen, Arthur, Manning, Covino], A844
- encapsulated, influence of different liposomal formulations on pharmacokinetics of [Legros, Luo, Bourgeois, Lafont, Boogaerts], A851
- epinephrine reverses cardiac arrest induced by, in rats [Wu, Bircher, Safar], A303
- hemodynamic, electrophysiologic and respiratory effects of cumulative doses of, in anesthetized rats [Dauchot, Lina, Anton], A793
- myocardial ischemia and,; study in pig in situ heart [Freysz, Timour, Loufoua, Bertrix, Gerentes, Faucon], A610

- titration of pH and CO<sub>2</sub> partial pressure in local anesthetic agents [Russell, Graybeal, Strout], A834
- vasoactive actions of 2-chloroprocaine and, on umbilical vascular smooth muscle [Halevy, Monuszko, Freese, Shih, Paikh, Liu-Barnett, Altura], A347
- chloroprocaine**
- titration of pH and CO<sub>2</sub> partial pressure in local anesthetic agents [Russell, Graybeal, Strout], A834
- vasoactive actions of bupivacaine and 2-chloroprocaine on umbilical vascular smooth muscle [Halevy, Monuszko, Freese, Shih, Paikh, Liu-Barnett, Altura], A347
- cocaine**
- age-related uptake of, in rats [Morishima, Khan, Hara, Cooper, Miller], A929
- hydralazine does not improve decreased uterine blood flow during hypertension induced by, in pregnant ewe [Vertommen, Hughes, Shnider, Rosen, Espinoza, Messer], A928
- lidocaine**
- alters flow-mediated changes in large arteries in humans [Duranteau, Edouard, Demoulis, Prussard, Berdeaux], A123
- CO-administered bupivacaine and, cardiovascular and central nervous system effects of, in piglets [Kyta, Heavner, Badgwell, Rosenberg], A756
- differential sensitivity of synaptic components to local anesthetics [Tabatabai, Booth], A789
- effects of QX-314 on single cardiac sodium channels [Gingrich, Yue], A372
- effects of ropivacaine, bupivacaine, and, upon isolated spontaneously beating rabbit heart [Feldman, Pitkanen, Arthur, Manning, Covino], A844
- lidocaine HCl increases glucose uptake in cultured mouse fibroblasts [Hanley, Knutson], A730
- liposomal-encapsulated, prolongation of anesthetic effect by epidural administration of, in dogs [Mashimo, Inagaki, Uchida, Pak, Yoshiya], A798
- plasma protein binding determines partitioning of, into brain and CSF following intravenous bolus administration in dogs [Bowdle, Artru, Marathe, Shen], A355
- potentiation of local anesthetic action of, following bicarbonate buffering [Maytorena, Rogers, Bunegin, Ramamurthy], A796
- titration of pH and CO<sub>2</sub> partial pressure in local anesthetic agents [Russell, Graybeal, Strout], A834
- tonic and phasic local anesthetic effects in rat hippocampal pyramidal cells [Butterworth IV, Cole], A763
- mepivacaine**
- duration of block and analgesia after brachial plexus anesthesia with; effect of clonidine added to anesthetic solution [Singelyn, Gouverneur], A797
- procaine**
- subliminal concentrations of diethylaminoethanol and, reduce excitability, but not action potential amplitude of hippocampal pyramidal cells [Butterworth, Cole], A774
- titration of pH and CO<sub>2</sub> partial pressure in local anesthetic agents [Russell, Graybeal, Strout], A834
- ropivacaine**
- comparison of 0.75% ropivacaine and 0.75% bupivacaine for epidural anesthesia [Concepcion, Steele, Bader, Arthur], A792
- does it induce vasoconstriction? [Guinard, Carpenter, Owens, Nadir], A847
- effects of, on uterine blood flow in pregnant sheep [Santos, Wlody, Pederson, Morishima, Finster], A927
- effects of bupivacaine, lidocaine and, upon isolated spontaneously beating rabbit heart [Feldman, Pitkanen, Arthur, Manning, Covino], A844
- tetracaine**
- hyperbaric, effect of volume of, on level of spinal anesthesia [Hecker, Kingsley], A819
- Anesthetics, volatile**
- actions of ethanol and volatile general anesthetics at boundary lipid [Firestone, Ferguson], A709
- chloroform**
- protein-anesthetic interaction: conformational transition of polypeptide by volatile anesthetics [Chiou, Kamaya, Ueda], A726
- desflurane**
- cardiovascular responses in infants and children [Taylor, Lerman, Sikich, Shandling], A1104
- comparison of effects of isoflurane and, on action of atracurium in man [Smiley, Ornstein, Mathews, Matteo], A882
- comparison of isoflurane and, for coronary surgery [Bowering, Thomson, Hudson, Peters, Rosenbloom], A321
- effect of, on cerebrospinal fluid pressure in neurosurgical patients [Muzzi, Losasso, Dietz, Faust, Milde], A1215
- effect of fentanyl and nitrous oxide on MAC of [Ghouri, White], A392
- effect of I-653 on somatosensory evoked potentials [Black, Konstadt, Sami, Rao], A181
- effects of isoflurane and, on cardiovascular (CV) and coronary dynamics (CoD) in chronically instrumented dog [Merin, Bernard, Doursout, Chelly], A552
- hemodynamic actions compared to halothane, isoflurane and enflurane in chronically instrumented dogs [Pagel, Schmeling, Kampine, Warltier], A580
- hemodynamic effects of isoflurane vs., in patients undergoing coronary bypass graft surgery [Ross, Gomez, Lemmer, Bates, Tinker], A165
- human EEG dose response to [Rampil, Lockhart, Eger, Weiskopf], A1218
- induction and recovery characteristics of, in infants and children [Taylor, Lerman, Sikich, Shandling], A1246
- induction of anesthesia with; comparison of conventional and vital capacity rapid inhalation induction techniques [Kelly, Hartman, Embree, Artusio], A51
- isoflurane and, in surgical patients: comparative hemodynamics and emergence [Battito, Langner, Bradley, Jr.], A393
- isoflurane vs., dose-response relationship of pancuronium and succinylcholine [Caldwell, Magorian, Lynam, Segredo, Eger II, Miller], A860
- isoflurane vs., intubating conditions and related hemodynamic response [Azad, Bartkowski, Witkowski, Marr, Lessin, Seltzer], A327
- isoflurane vs., with or without N<sub>2</sub>O for outpatient laparoscopy [Zahl, Prasad, Mingus, Shapiro], A11
- MAC of, is decreased but recovery time is unaltered following premedication with midazolam (0.05 mg/kg) [Glosten, Faure, Lichtor, Apfelbaum, Roizen, Robert, Bedwell, Karl], A346
- mid-latency auditory evoked potentials and intraoperative wakefulness during general anesthesia with propofol, isoflurane, and flunitrazepam/fentanyl [Schwender, Madle, Keller, Poppel], A180
- phase II-III clinical trial with, in ASA I adult patients [Lee, Kwan, Chen, Tsai, Gyermek, Yang, Cheng, Cantley], A363
- potentiation of atracurium in humans by [Lee, Kwan, Chen, Tsai, Gyermek, Cheng, Cantley], A875
- potentiation of pancuronium bromide by; comparison with isoflurane [Witkowski, Azad, Bartkowski, Wpstein, Marr, Lessin], A903
- psychomotor recovery after isoflurane vs., in outpatients [Ghouri, Bodner, White], A9

- response of canine cerebral circulation to hyperventilation during anesthesia with [Lutz, Milde, Milde], A1212
- uptake, equilibration and elimination of, in healthy adult patients in clinical setting [Lee, Kwan, Chen, Tsai, Cantley], A364
- vital capacity rapid inhalation induction with, [Hartman, Kelly, Embree, Artusio], A20
- detection and quantification of mixed volatile anesthetics by Poet II and a mass spectrometer [Jameson], A441
- diethyl ether**
- enhancement of  $^{36}\text{Cl}$ -flux through gaba-gated channel by, is not agonist-dependent [Quinlan, Firestone], A707
- general anesthetics and ethanol inhibit enzymatic activity of CNS-derived protein kinase C [Firestone, Gray, Firestone], A706
- enflurane**
- actions of halothane, isoflurane and, on purkinje fibers in non-infarcted and infarcted canine hearts [Turner, Polic, Marijic, Hoffman, Bosnjak], A588
- anesthetic alterations of neurogenic motor evoked potentials in swine [Peterson, Short, Mongan], A209
- anesthetic outcome after outpatient laparoscopy: isoflurane vs. with fentanyl and droperidol [Levy, Pandit, Randel, Lebombo-Mansour, Kothary], A35
- blood flow to splanchnic organs and tissue oxygenation of liver and pancreas during hypotension induced by [Vollmar, Kerner, Vierl, Conzen, Habazettl, Waldner, Peter, Brendel], A614
- compared to, isoflurane produces less depression of stroke volume and autonomic response of canines given phenylephrine [Hoffman, Koev, Solomon, Banks, Yatsiv, Dolan, Clements, Natanson], A410
- desflurane: hemodynamic actions compared to halothane, isoflurane and, in chronically instrumented dogs [Pagel, Schmeling, Kampine, Warltier], A580
- differential effects of inhalational anesthetics on sympathetic ganglionic transmission [Bosnjak, Schedewie, Boban, Kampine], A688
- dose-response and recovery of ORG9426 under [Bartkowski, Witkowski, Azad, Epstein, Marr, Lessin], A902
- dose-response study comparing coronary circulatory effects of isoflurane and, in normal dog [Elia, Liu], A634
- effect of intravenous ATP on,  $\text{N}_2\text{O}$  MAC in spontaneously breathing rabbits: assessment of cardiorespiratory effects [Kikuta, Fukunaga, Ginsburg, Fukunaga, Okada], A401
- effect of volatile anesthetics on albumin synthesis and secretion in guinea pig liver slices [Ghantous, Fernando, Hastings, Gandolfi, Brendel], A359
- effects of, on retinal blood flow in cats [Roth, Crittenden], A345
- enhancement of gaba-activated chloride conductance in cultured rat hippocampal neurons by [Jones, Brooks, Harrison], A710
- inhibition of reflex venoconstriction of mesenteric capacitance vessels by [Stadnicka, Bosnjak, Kampine], A651
- preretinal oxygen tension during, in cats [Roth, Neeley, Ernest, Goldstick, Moss], A383
- preservation of renal blood flow by [Jarnberg, Marrone, Priano], A572
- protein-anesthetic interaction: conformational transition of polypeptide by volatile anesthetics [Chiou, Kamaya, Ueda], A726
- renal function following cyclosporine and [Fish, Rice, Peterson], A361
- volatile anesthetics and platelet aggregation in pigs and humans [Bertha, Sill, Plumhoff, Bowie, Nelson], A586
- halothane**
- actions of enflurane, isoflurane and, on purkinje fibers in non-infarcted and infarcted canine hearts [Turner, Polic, Marijic, Hoffman, Bosnjak], A588
- additive contribution of  $\text{N}_2\text{O}$  to MAC of, in infants and children [Murray, Mehta, Forbes, Dull], A1235
- alteration of vascular responsiveness to isoflurane and, by endothelium [Brian, Seifen, Kennedy], A641
- alteration of virus-specific immune response to influenza infection by, in mice [Tait, Davidson, Johnson, Remick, Knight], A340
- amiodarone and, effects on canine purkinje fiber action potentials [Gallagher, Bianchi, Gessman], A663
- anesthetic alterations of neurogenic motor evoked potentials in swine [Peterson, Short, Mongan], A209
- attenuation of sympathetic adrenergic regulation of pulmonary circulation by, following hypotension and hypoperfusion [Murray, Fehr, Chen, Nyhan], A601
- attenuation of both receptor and nonreceptor mediated EDRF production by, in rat thoracic aorta [Uggeri, Johns], A604
- attenuation of mesenteric venoconstriction by, in response to graded hypercapnea [Stekiel, Tominaga, Bosnjak, Kampine], A578
- cerebral blood flow reactivity to  $\text{CO}_2$  during isoflurane or, for carotid endarterectomy [Young, Prohovnik, Correll, Ostapovich, Ornstein, Quest], A204
- comparative cardiovascular depression of, in neonates and infants [Murray, Forbes, Mahoney], A1132
- comparative effects of, on single skinned muscle fibers from normal patients and patients with malignant hyperthermia [Adnet, Britt, Scott, Frodis], A353
- comparative effects of ryanodine-halothane on resting tension of muscle in normal patients and patients susceptible to malignant hyperthermia [Adnet, Britt, Frodis, Scott], A352
- comparison of European and North American protocols for diagnosis of malignant hyperthermia (MH) with [Rosenberg, Fletcher, Davidson, Conti, Huggins], A1220
- concentration of, blocking cardiovascular responses to incision in infants and children [Ishizawa, Dohi], A1116
- decreases ionic fluxes due to metabolic inhibition, hypothermia or ischemia in atrial muscle strips [Eckenhoff], A644
- depresses gallopomil binding to bovine heart sarcolemma [Hoehner, Quigg, Blanck], A370
- desflurane: hemodynamic actions compared to isoflurane, enflurane and, in chronically instrumented dogs [Pagel, Schmeling, Kampine, Warltier], A580
- different cardiovascular responses to volume expansion during isoflurane and [Mayer, Zimpfer], A568
- differential effects of inhalational anesthetics on sympathetic ganglionic transmission [Bosnjak, Schedewie, Boban, Kampine], A688
- dual action of, on sympathetic function: decrease in NE release and clearance [Deegan, Wood, Wood], A591
- effect of, in low concentrations on cerebral blood flow and cerebral metabolism in baboon [Brussel, Van Aken, Fitch], A178
- effect of, on guinea pig and human bronchi [Zhou, Vann, Will], A1193
- effect of concomitant analgesic therapy on awakening concentration of, in children [Watcha, Laguere, White], A1099
- effect of ketamine and, on splanchnic circulation in pig [Loick, Tokyay, Herndon], A607
- effect of secobarbital and, on cholinergic binding to neuronal nicotinic receptors [Dodson, Braswell], A699
- effect of transcutaneous cranial electrical stimulation on, requirements in rats [Mantz, Azerad, Limoge, Thierry, Glowinski, Desmonts], A671
- effect of two inhalation anesthetics on hemodynamics, coronary flow, and myocardial metabolism in patients with left main coronary lesion [Kivassilis, Pulley, Kater, Genton, Kelermenos, Lappas], A89

- effect of volatile anesthetics on albumin synthesis and secretion in guinea pig liver slices [Ghantous, Fernando, Hastings, Gandolfi, Brendel], A359
- effect of volatile anesthetics on hypothermic myocardium [Matheussen, Boutros, Van Aken, Flameng], A574
- effects of, on phospholipid N-methylation in rat brain synaptosomes [Franks, Sastry, Kambam, Surber, England], A404
- effects of epinephrine and, on automaticity of dominant and subsidiary atrial pacemakers [Bosnjak, Polic, Laszlo, Kampine, Atlee], A576
- effects of isoflurane and, on diaphragmatic microcirculation in rats [Leon, Boczkowski, Dureuil, Aubier, Desmonts], A1142
- effects of nitrous oxide and/or, on cleavage rate during general anesthesia for oocyte retrieval [Palot, Visseaux, Harika, Carre-Pigeon, Rendoing], A930
- effects of reduction of, on regio-specific metabolism of R- and S-Warfarin in hepatic microsomes [Baker, Vasquez, Chiang], A360
- effects of sevoflurane, isoflurane and, on hepatic blood flow and oxygenation in chronically instrumented greyhound dogs [Frink, Morgan, Coetzee, Scipione, Brown], A558
- emergence respiratory complications in children: a comparison between isoflurane and, in children extubated deep or awake [Pounder, Blackstock, Steward], A1095
- enhances tonic GABA<sub>A</sub>-mediated neuronal inhibition by elevating intracellular calcium [Mody, MacIver, Tanelian], A668
- epidural morphine reduces MAC of, in humans [Schwieger, Klopfenstein, Forster], A337
- esmolol reduces MAC of, in rats [Partridge, Kon], A333
- general anesthetics and ethanol inhibit enzymatic activity of CNS-derived protein kinase C [Firestone, Gray, Firestone], A706
- global ischemia and reperfusion in vitro: effects of, on contractility and development of dysrhythmias [Buljasic, Marijic, Stowe, Kampine, Bosnjak], A579
- glutathione depletion exacerbates hepatotoxicity associated with, in guinea pigs [Lind, Gandolfi], A398
- heart rate dependent effects of volatile anesthetics on cardiac sarcoplasmic reticulum [Winguth, Roewer, Hunerbein, Rumberger, Schulte am Esch], A658
- increased alpha-1 receptor binding: possible mechanism for halothane-epinephrine "sensitization" [Miletich, Minshall, Albrecht], A721
- increased phospholipid N-methylation in rat brain myelin membranes during anesthesia with [Franks, Sastry, Kambam, Surber, England], A405
- influence of anesthesia on pacing-induced ischemia threshold [Spahn, Leone, McRae, Smith], A595
- influence of fentanyl and, on time course of pulmonary blood flow redistribution during one lung ventilation [Heerd, Blessios], A741
- isoflurane, Ca<sup>2+</sup> transients and, in cultured vascular smooth muscle cells [Iaizzo, Sill, Olsen, Powis, Van Dyke], A344
- isoflurane and, and agonist-induced responses in cultured vascular smooth muscle cells [Nelson, Sill, Uhl, Van Dyke, Iaizzo], A394
- isoflurane and, and responses of cultured pig coronary artery endothelial cells [Uhl, Sill, Nelson, Johnson, Blaise], A621
- isoflurane and, and responses to endothelin in pig coronary arteries and cultured vascular smooth muscle cells [Ozhan, Sill, Hughes, Uhl, Blaise], A584
- isoflurane and, and second messenger pathways in isolated pig coronary arteries [Ozhan, Sill, Katusic, Nelson, Iaizzo], A554
- memory evanescence in mice exposed to [Rosman, Quartermain, Turndorf], A745
- MK 801 markedly reduces requirements for thiopental and, in rats [Mantz, Desmonts], A672
- modulation of intracellular calcium fluxes in oxidant-injured endothelial cells by isoflurane and [Shayevitz, Varani, Knight], A341
- motor nerve terminal effects of potentiate curare-induced neuromuscular block [Sokoll, Bhattacharyya, Davies, Zwagerman], A872
- ORG9426: single-dose response, onset, and duration with [Tullock, Wilks, Bandom, Diana, Cook], A877
- oxygenation of porcine gut is reduced by, but is maintained by ketamine [Tokuy, Loick, Stothert, Jr., Traber, Herndon], A312
- peripheral vasodilatation induced by, may be dependent on endothelium-derived relaxing factor [Miletich, Koenig, Albrecht], A600
- positive in vitro contracture test in pigs exhibiting nonrigid malignant hyperthermia [Fletcher, Huggins, Davidson, Conti, Rosenberg], A206
- preoptic region thermosensitive single unit neuronal activity is reduced by [Poterack, Kampine, Schmeling], A689
- production and detection of volatile anesthetic-associated neoantigens in vitro [Brown, Hastings, Gandolfi], A350
- protein-anesthetic interaction: conformational transition of polypeptide by volatile anesthetics [Chiou, Kamaya, Ueda], A726
- pulmonary vascular response to cyclooxygenase inhibition is abolished during [Nyhan, Chen, Fehr, Rock, Murray], A627
- removal of epithelium does not affect response of isolated canine airways to [Sayiner, Warner, Rehder], A1143
- requirement for, in mice selectively bred for sensitivity and resistance to diazepam [McCrae, Gallaher, Winter, Firestone], A708
- spontaneous minute ventilation during, in infants and children [Brown, Bissonnette, Holtby, Gerus, Macpherson, Ein, Shandling], A1105
- superoxide production by simulated endothelial cells exposed to varying concentrations of [Noorily, Shayevitz, Varani], A403
- toxicity vs. protection by, during hypoxia: relationship to glutathione [Johnson, Van Dyke], A365
- volatile anesthetics and platelet aggregation in pigs and humans [Bertha, Sill, Plunhoff, Bowie, Nelson], A586
- volatile anesthetics gate a novel chloride conductance in cultured post-natal rat hippocampal neurons [Yang, Zorumski], A714
- isoflurane**
- actions of halothane, enflurane and, on purkinje fibers in non-infarcted and infarcted canine hearts [Turner, Polic, Marijic, Hoffman, Bosnjak], A588
- alteration of vascular responsiveness to halothane and, by endothelium [Brian, Seifen, Kennedy], A641
- anesthetic alterations of neurogenic motor evoked potentials in swine [Peterson, Short, Mongan], A209
- anesthetic outcome after outpatient laparoscopy: enflurane vs., with fentanyl and droperidol [Levy, Pandit, Randel, Lebenbom-Mansour, Kothary], A35
- CBF response to, following brain injury in rabbit [Ramani, Todd, Warner], A680
- cerebral blood flow reactivity to CO<sub>2</sub> during halothane or, for carotid endarterectomy [Young, Prohovnik, Correll, Ostapovich, Ornstein, Quest], A204
- cerebral vasodilating effect of sevoflurane vs. isoflurane [Lu, Gibson, Frost, Goldiner], A625
- CNS cholinergic mechanisms in anesthesia [Zucker, Calkins], A669
- comparative neuromuscular blocking effect of pipecuronium and pancuronium under [Larijani, Gratz, Afshar, Jacobi, Minassian, Hughes, Scott, deCastro, Weinberger], A891



- compared to enflurane, it produces less depression of stroke volume and autonomic response of canines given phenylephrine [Hoffman, Koev, Solomon, Banks, Yatsiv, Dolan, Clements, Natanson], A410
- comparison of alfentanil and, on pressor and catecholamine responses during outpatient laparoscopic surgery [Ramathan, Nocollerat, Birch, Coleman, Heerdt], A50
- comparison of desflurane and, for coronary surgery [Bowering, Thomson, Hudson, Peters, Rosenbloom], A321
- comparison of effects of desflurane and, on action of atracurium in man [Smiley, Ornstein, Mathews, Matteo], A882
- comparison of electroencephalographic spectral signatures during sevoflurane and [Watt, Ehlers, Scipione, Navabi], A171
- comparison of thiopental-isoflurane-N<sub>2</sub>O, propofol-N<sub>2</sub>O, and propofol alone for neuroanesthesia [Van Hemelrijck, Tempelhoff, Jellish, White], A167
- coronary bypass graft flow vasodilation induced by, has only negligible effects on left ventricular systolic function [Leclerc, Fratacci, Dupuy, Payen], A147
- coronary microvessel segmental resistances during vasodilation by nitroglycerin, adenosine and, in dogs [Conzen, Habazettl, Christ, Baier, Vollmar, Goetz, Brendel, Peter], A613
- depressive effect of, on myocardial beta-adrenergic responsiveness is not related to alternation of beta-receptor density [Lancon, Marty, Delforge, Janier, Syrota], A638
- desflurane: hemodynamic actions compared to halothane, enflurane and, in chronically instrumented dogs [Pagel, Schmeling, Kampine, Warltier], A580
- desflurane and, in surgical patients: comparative hemodynamics and emergence [Battito, Langner, Bradley, Jr.], A393
- desflurane potentiation of pancuronium bromide: comparison with [Witkowski, Azad, Bartkowski, Wpstein, Marr, Lessin], A903
- desflurane vs., dose-response relationship of pancuronium and succinylcholine [Caldwell, Magorian, Lynam, Segredo, Eger II, Miller], A860
- desflurane vs., intubating conditions and related hemodynamic response [Azad, Bartkowski, Witkowski, Marr, Lessin, Seltzer], A327
- desflurane vs., with or without N<sub>2</sub>O for outpatient laparoscopy [Zahl, Prasad, Mingus, Shapiro], A11
- different cardiovascular responses to volume expansion during halothane and [Mayer, Zimpfer], A568
- differential effects of inhalational anesthetics on sympathetic ganglionic transmission [Bosnjak, Schedewie, Boban, Kampine], A688
- does aging alter rate of elimination of? [Dwyer, Clarke, Fee], A357
- does choice of anesthetic have effect on myocardial ischemia during anesthetic induction and intubation? [Leung, Levenson, Hollenberg], A99
- does it affect cerebrovascular response to carbon dioxide in anesthetized children? [Leon, Bissonnette, Lerman], A1221
- dose response study comparing coronary circulatory effects of enflurane and, in normal dog [Elia, Liu], A634
- effect of, and cardiac output on hypoxic pulmonary vasoconstriction [Chen], A1171
- effect of 1 MAC of, on cerebrovascular response to increased or decreased cerebral perfusion pressure [McPherson, Derrer, Traystman], A1219
- effect of two inhalation anesthetics on hemodynamics, coronary flow, and myocardial metabolism in patients with left main coronary lesion [Kivassilis, Pulley, Kater, Genton, Kelermenos, Lappas], A89
- effect of volatile anesthetics on hypothermic myocardium [Matheussen, Boutros, Van Aken, Flameng], A574
- effect on guanine nucleotide inhibition of 5HT<sub>1A</sub> agonist binding in fischer 344 rat brain [Silverstein, Mahle, Iberti, Maayani], A736
- effect on isolated canine cerebral vascular segments is not endothelium-dependent [Flynn, Bosnjak, Kampine], A577
- effects of anesthetic overdose with sevoflurane and, on hemodynamics and oxygenation [Cork, DiNardo, Hilwig, Kern], A1077
- effects of anesthetics and steal-prone anatomy on myocardial ischemia [Leung, O'Kelly, Mangano], A100
- effects of concentration of, on recovery of pipecuronium neuromuscular blockade following neostigmine administration [Meistelman, Plaud, Lira, Donati], A886
- effects of desflurane and, on cardiovascular and coronary dynamics in chronically instrumented dog [Merin, Bernard, Doursout, Chelly], A552
- effects of halothane and, on diaphragmatic microcirculation in rats [Leon, Boczkowski, Dureuil, Aubier, Desmonts], A1142
- effects of residual levels of, on reversal of vecuronium-induced neuromuscular blockade [Baurain, Melot, d'Hollander, Bernovoi, Barvasi], A895
- effects of sevoflurane, halothane and, on hepatic blood flow and oxygenation in chronically instrumented greyhound dogs [Frink, Morgan, Coetzee, Scipione, Brown], A558
- effects on blood-brain barrier transport [Chi, Anwar, Sinha, Weiss], A682
- effects on coronary flow and development of dysrhythmias during ischemia and reperfusion [Boban, Buljubasic, Stowe, Marijic, Bosnjak], A654
- effects on hemodynamic changes following infrarenal aortic cross clamping [Menguy, Winckler], A77
- effects on splanchnic oxygenation during normovolemic hemodilution [Noldge, Priebe, Schmidt, Kopp, Geiger], A546
- emergence respiratory complications in children: a comparison between halothane and, in children extubated deep or awake [Pounder, Blackstock, Steward], A1095
- halothane, Ca<sup>2+</sup> + transients and, in cultured vascular smooth muscle cells [Iaizzo, Sill, Olsen, Powis, Van Dyke], A344
- halothane and, and agonist-induced responses in cultured vascular smooth muscle cells [Nelson, Sill, Uhl, Van Dyke, Iaizzo], A394
- halothane and, and responses of cultured pig coronary artery endothelial cells [Uhl, Sill, Nelson, Johnson, Blaise], A621
- halothane and, and responses to endothelin in pig coronary arteries and cultured vascular smooth muscle cells [Ozhan, Sill, Hughes, Uhl, Blaise], A584
- halothane and, and second messenger pathways in isolated pig coronary arteries [Ozhan, Sill, Katusic, Nelson, Iaizzo], A554
- heart rate dependent effects of volatile anesthetics on cardiac sarcoplasmic reticulum [Winguth, Roewer, Hunerbein, Rumberger, Schulte am Esch], A658
- hemodynamic effects of desflurane vs., in patients undergoing coronary bypass graft surgery [Ross, Gomez, Lemmer, Bates, Tinker], A165
- human dose response of ORG9426 under [Quill, Begin, Glass, Ginsberg, Gorbach], A910
- induces coronary steal compared to enflurane in dog model of critical coronary stenosis [Elia, Liu], A657
- impairs pupillary light reflex in humans [Larson, Sessler], A408
- influence of anesthesia on pacing-induced ischemia threshold [Spahn, Leone, McRae, Smith], A595
- influence of methohexitone vs., on cerebral blood flow velocity autoregulation during cardiopulmonary bypass [Renz, Kalriczek, Kraus, Höche], A126
- partially protects energy balance in isolated hepatocytes during

- in vitro anoxia [Pathak, Becker, Reilly, Hanson, Landers], A336
- L-644,711 increases MAC of, in rats [Matsumura, Cole], A366
- MAC-awake of, evaluated by slow and fast alveolar washout [Mustaki, Gaumann, Tassonyi], A338
- modulation of intracellular calcium fluxes in oxidant-injured endothelial cells by halothane and [Shayevitz, Varani, Knight], A341
- N<sub>2</sub>O vs., impact on CSF pressure in brain tumor patients [Jung, Reinsel, Galicich, Bedford], A193
- psychomotor recovery after desflurane vs., in outpatients [Ghouri, Bodner, White], A9
- ranitidine reduces nausea and vomiting after thiopental-isoflurane anesthesia [Kraynack, Bates], A42
- rCBF and formation of brain edema in presence of a focal lesion: influence of fentanyl, thiopental or [Murr, Schurer, Berger, Baethmann, Enzenbach, Peter], A566
- respiratory complications and hypoxic episodes during induction with, in children: effect of induction technique [Warde, Nagi, Raftery], A1119
- role of endothelium in modulating vasodilation induced by, in rabbit basilar artery [Jensen, Todd, Kramer, Leonard, Warner, Bollen], A648
- sevoflurane reduces whole body oxygen consumption more than in pigs [DiNardo, Cork, Kern, Hilwig], A409
- vasodilation induced by, minimally increases cutaneous heat loss [Sessler, McGuire, Moayeri, Hynson], A87
- volatile anesthetics and platelet aggregation in pigs and humans [Bertha, Sill, Plumhoff, Bowie, Nelson], A586
- volatile anesthetics gate a novel chloride conductance in cultured post-natal rat hippocampal neurons [Yang, Zorumski], A714
- sevoflurane**
- cerebral vasodilating effect of isoflurane vs. [Lu, Gibson, Frost, Goldiner], A625
- comparison of electroencephalographic spectral signatures during isoflurane and, [Watt, Ehlers, Scipione, Navabi], A171
- effects of anesthetic overdose with isoflurane and, on hemodynamics and oxygenation [Cork, DiNardo, Hilwig, Kern], A1077
- effects of isoflurane, halothane and, on hepatic blood flow and oxygenation in chronically instrumented greyhound dogs [Frink, Morgan, Coetzee, Scipione, Brown], A558
- reduces whole body oxygen consumption more than isoflurane in pigs [DiNardo, Cork, Kern, Hilwig], A409
- relationship between serum F and cytochrome P-450 following, in ethanol treated rats [Masaki, Kondou, Kobayashi], A396
- Anesthetic techniques**
- adenosine**
- attenuation of baroreflex response to acute hypotension by nitroprusside during intracoronary infusion of ATP [Taneyama, Goto, Nakazawa, Unruh, Arakawa], A650
- total coronary resistance and vessel segment resistances during hypotension induced by [Habazettl, Conzen, Christ, Baier, Vollmar, Peter, Brendel], A645
- balanced**
- brachial plexus blockade vs. general anesthesia for orthopedic operation on upper extremity in outpatients [Baysinger, Bowe, Bowe, Sykes], A43
- combination of thoracic epidural and light general anesthesia does not induce myocardial segmental wall motion abnormalities [Saada, Catoire, Delaunay, Brun, Bonnet], A132
- comparison of two sedative-analgesic techniques for lithotripsy under MAC [Monk, Boure, White], A387
- effect of anesthetic technique on right coronary artery disease patients who have elevated pulmonary artery pressure [Howie, Romanelli, Rypel, Howie], A154
- esmolol/N<sub>2</sub>O/relaxant: a new effective anesthetic maintenance technique [Geva, Sagi, Perel], A320
- general vs. regional anesthesia for inguinal herniorrhaphy [Behnia, Poticha, Hashemi, Ujicki], A52
- optimum concentration of bupivacaine for balanced general/caudal anesthesia in children [Gunter, Dunn, Bennie, Pentecost, Bower, Ternberg], A1237
- perioperative body temperature regulation in regional vs. general anesthesia [Frank, Crowley, Parker, Christopherson, Williams, Rock, Perler, Beattie], A785
- postoperative pain and, is narcotic important? [Varlotta, Smalto], A848
- prospective evaluation of epidural vs. general anesthesia for outpatient arthroscopy [Parnass, McCarthy, Bach, Werling, Hasson], A23
- regional vs. general anesthesia in outpatients [Bowe, Baysinger, Sykes, Bowe], A44
- subarachnoid blockade vs. general anesthesia for knee arthroscopy in outpatients [Bowe, Baysinger, Sykes, Bowe], A45
- thoracic epidural anesthesia is not preferable to general anesthesia in high risk surgical patients [Baron, Bertrand, Barre, Godet, Coriat, Viars], A807
- brachial plexus**
- general anesthesia vs., for orthopedic operation on upper extremity in outpatients [Baysinger, Bowe, Bowe, Sykes], A43
- with lidocaine, effects of intramuscular or local clonidine for prolongation of [Wyss, Karrp, Mons, Bellhacen, Alame, Ruelle], A821
- with mepivacaine, duration of block and analgesia following, effect of clonidine added to anesthetic solution [Singelyn, Gouverneur], A797
- outpatient [Davis, Lennon, Wedel], A26
- role of, following negative response from stellate ganglion block for RSD [Durrani, Winnie], A837
- bronchoscopy**
- fiberoptic, increased work required to breathe during [Wissler, Boysen, Banner], A463
- caudal**
- epinephrine and, in infants: onset, duration, and hemodynamic effects [Gunter, Dunn, Bower, Ternberg], A1098
- low-dose morphine, efficacy and safety of, for postoperative analgesia in infants and young children [Savarese, McGowan, Oh, O'Connor], A1129
- mechanism of Horner's syndrome resulting from epidural, intercostal, interpleural, sympathetic and, nerve blocks [Shantha], A192
- optimum concentration of bupivacaine for balanced general/caudal anesthesia in children [Gunter, Dunn, Bennie, Pentecost, Bower, Ternberg], A1237
- pediatric, incidence of bloody taps during [van Obbergh, Veyckemans, Gouverneur], A1236
- in sixty-nine conscious premature and high-risk infants [Gunter, Dunn, Bower, Ternberg], A1097
- celiac plexus**
- fluoroscopy or CT scan for? [Jain, Shah, Bedford], A794
- for therapy of gastrointestinal dysfunctions in neurosurgical ICU patients [Weinstabl, Proges, Plainer, Werba, Spiss], A843
- cervical**
- deep and superficial, with bupivacaine for carotid endarterectomy: pharmacokinetic study [Debaene, Elman, Squalli, Jolis, Mazoit], A782
- lidocaine and bupivacaine dosages in, for carotid endarterectomy [Goursot, Mazoit, Dufieux, Bismut, Carrat], A822

- closed circle**  
nitrogen buildup in [Philip], A465
- computer-controlled infusion of atracurium** [O'Hara, Derbyshire, Overdyk, Bogen, Marshall], A414
- endobronchial**  
continuous insufflation during median sternotomy [Watson, Szarko, Sequeira, Mackenzie, Mark], A1192
- epidural**  
butorphanol augments lidocaine analgesia during labor [Zhu, Abboud, Afrasiabi, Reyes, Sherman, Vera Cruz, Steffens], A979  
butorphanol and lidocaine for cesarean section: maternal effects of neonatal outcome [Abboud, Zhu, Reyes, Steffens, Afrasiabi, Vera Cruz, Miller], A935  
catheter aspirate [Waters, Chuba, Ramanathan, Turndorf], A959  
caudal, in sixty-nine conscious premature and high-risk infants [Gunter, Dunn, Bower, Ternberg], A1097  
changes in body oxygen consumption during recovery from spinal and [Constant, Bonnet], A808  
chloroprocaine, back pain following [Hynson, Sessler, Glosten, McGuire], A48  
chloroprocaine antagonism of: receptor specific phenomenon? [Camann, Hartigan, Gilbertson, Johnson, Datta], A934  
clinical sensitivity and specificity of epidural test dose in obstetrics as marker of intravascular injection [Colonna-Romano, Lingaraju, Mazala, Horrow], A925  
clonidine, effect on fentanyl analgesia and pharmacokinetics in postoperative patients [Rostaing, Bonnet, Levron, Vodinh, Pluskwa], A779  
clonidine does not cause inflammatory changes [Robichaux, Cicala], A1267  
clonidine infusion following cesarean section [Mendex, Eisenach, Kashtan], A919  
clonidine suppresses postepidural shivering: double blind study [Tryba, Zenz, Pern], A788  
combination of thoracic epidural and light general anesthesia does not induce myocardial segmental wall motion abnormalities [Saada, Catoire, Delaunay, Brun, Bonnet], A132  
comparison between gravity and bolus administration of local anesthetics during, in obstetrics [Cohen, Amar], A974  
comparison between sufentanil and bupivacaine used for immediate post-cesarean section relief in patient already receiving epidural morphine [Seitman], A989  
comparison of .0312% bupivacaine plus sufenta and .0625% bupivacaine plus sufenta for, during labor and delivery [Williams, Kwan, Chen, Wu], A950  
comparison of intravenous PCA and, after gynecological surgery [Walmsley, McDonnell, Colclough, Kennedy, Witt, Littrell, Pedito], A1268  
comparison of postoperative intravenous and epidural opiate dose requirements [Chrubasik, Magora], A804  
comparison of 0.75% ropivacaine and 0.75% bupivacaine for [Concepcion, Steele, Bader, Arthur], A792  
comparison of two sedative-analgesic techniques for lithotripsy under MAC [Monk, Boure, White], A387  
conscious sedation vs., for lithotripsy on HM4 Dornier Lithotripter [Reynolds, Gormley, Cowan, Brown], A28  
continuous bupivacaine-fentanyl infusions in children following ureteral reimplantation [Berde, Sethna, Yemen, Pullerits, Miler], A1128  
continuous epidural-PCA post- cesarean section: buprenorphine-bupivacaine 0.03% vs. fentanyl-bupivacaine 0.03% [Cohen, Amar, Pantuck, Weisman, Lustig], A975  
continuous epidural-PCA post- cesarean section: buprenorphine-bupivacaine 0.15% with epinephrine vs. fenatnyl-bupivacaine 0.15% with and without epinephrine [Cohen, Amar, Pantuck, Pantuck, Weisman, Landa], A918  
continuous fentanyl/butorphanol infusion for postoperative pain, evaluation of [Lubenow, Durrani, Ivankovich], A800  
continuous infusion of 1/2% bupivacaine for postoperative pain relief in pediatric urology patients [Bires, McGregor], A1108  
continuous postoperative analgesia, with and without disposable millipore filters, bacteriological comparison of [Bedder, Montreuil, Mulhall, Cotie, Richardson], A840  
decreased metabolic rate does not cause hypothermia during [Hynson, Sessler, Glosten, McGuire], A967  
direct observation of epidural space by superfine fiberscope [Imai], A1265  
does magnesium sulfate worsen maternal hypotension during, in gravid ewes? [Vincent, Chestnut, Sipes, Thompson, DeBruyn, Bleuer], A926  
dose-response study of continuous infusion fentanyl-epinephrine for post-cesarean analgesia [Youngstrom, Hoyt, Herman, Group, Ditto], A980  
effect of buprenorphine and morphine on central nervous system and minimum alveolar concentration in man [Kukushima, Yonemura, Nishimi], A820  
effect of intrathecal fentanyl on reported pain and vasoconstriction associated with cold pressor test [Chabal, Jacobson, Freund], A839  
effect on plasma catecholamines [Bray, Stevens, Artuso, Kao, Pary], A832  
efficacy of intravenous caffeine for post-dural puncture headache [Abboud, Zhu, Reyes, Steffens, Afrasiabi, Gendein], A936  
epinephrine and, in infants: onset, duration, and hemodynamic effects [Gunter, Dunn, Bower, Ternberg], A1098  
epinephrine test dose and epidural morphine side effects [Kavee, Winter, Zakowski, Ramanathan, Turndorf], A990  
epinephrine test doses: influence of aging [Guinard, Mulroy, Carpenter, Nadir], A773  
epinephrine vs. phenylephrine: effects on renal autoregulation during epidural hypotensive anesthesia [Zayas, Sharrock, Blumenfeld, McDonald, Sealey], A70  
fentanyl by PCA and continuous administration [Boudreault, Brasseur], A780  
fentanyl for post-vaginal delivery pain [Colburn, Mandell, Rudy], A986  
high-dose lumbar, changes in pulmonary function tests during [Urmey, McDonald], A1154  
impact of postoperative bupivacaine infusion on intravascular and extracellular fluid compartments [Burgess, Brooks, Wade, Perkins, Rodkey], A841  
influence of catheter direction on total dose of local anesthetic in [Tiso, Thomas], A805  
intravenous fentanyl infusions vs., in postthoracotomy patients: analgesic and pharmacokinetic effects [Panos, Sandler, Stringer, Badner, Lawson, Friedlander, Koren], A831  
intravenous fentanyl infusions vs., in postthoracotomy patients: respiratory effects [Stringer, Sandler, Panos, Badner, Lawson, Friedlander], A781  
laboratory model for measuring spinal axis spread of epidural opioids [Stevens, Petty, Harris, Bettencourt, Hahn], A799  
lidocaine 45mg in epidural test dose is not a marker of intravascular injection in parturients [Lingaraju, Colonna-Romano, Mazala], A976  
long term catheters in terminally ill patients: prospective study of complications in 129 patients [Tryba, Zenz, Strumpf], A784  
low-dose alfentanil vs. fentanyl with bupivacaine for continuous infusion for labor [Ray, Datta, Johnson, Bader], A933

- low-dose clonidine enhances morphine analgesia without causing hypotension in rabbits [Wang, Hiller, Simon, Li, Rosenberg, Turndorf], A806
- low-dose thoracic induces discrete thoracic analgesia without reduction in cardiac output [Tanaka, Harada], A127
- maternal obesity and headache following unexpected dural puncture [Heyman, Salem, Joseph], A971
- mechanism of Horner's syndrome resulting from caudal, intercostal, interpleural, sympathetic and, nerve blocks [Shantha], A192
- morphine decreases pain following trans-sternal thymectomy in patients with myasthenia gravis [Kirsch, Diringer, Borel, Hanley, Merritt, Bulkley], A272
- morphine reduces MAC of halothane in humans [Schwieger, Klopfenstein, Forster], A337
- neonatal neurobehavioral effects of continuous infusion of fentanyl/bupivacaine/epinephrine in labor [Hoyt, Youngstrom], A984
- sufentanil-bupivacaine for analgesia during labor and delivery [Naulty, Barnes, Becker, Pate, Griffith], A963
- patient-controlled analgesia: efficient and effective postoperative analgesia [Miguel, Trimble], A795
- patterns of steroid use by anesthesiologists in Illinois [Shulman, Ivankovich, Ivankovich], A1263
- pharmacokinetic profiles of alfentanil and fentanyl: bolus followed by continuous infusion technique [Wilhite, Moore, Christmas, Frank], A940
- pharmacokinetics in mothers and neonates of fentanyl, alfentanil and sufentanil administered by continuous infusion during labor [Palot, Visseaux, Levron, Le Moing, Rendoing], A1002
- postoperative, addition of bupivacaine 0.1% does not improve analgesia after knee joint replacement [Badner, Reimer, Moote, Komar], A761
- postoperative analgesia, does it reduce deep vein thrombosis? [Sharrock, Hargett, Urquhart, Insall, Ranawat], A69
- postoperative analgesia with morphine: single bolus vs. Daymate elastomeric continuous infusion technique [Leicht, Durkan, Evans, Kelleher, Glaze], A931
- pregnancy-induced hypertension and bleeding in parturients under [Troche, Hamza, Narchi, Lecoq], A998
- prevents loss of lung volume [Buckley, MacIntosh], A764
- prolongation of anesthetic effect by liposomal-encapsulated lidocaine in dogs [Mashimo, Inagaki, Uchida, Pak, Yoshiya], A798
- prospective evaluation of vs., for outpatient arthroscopy [Parnass, McCarthy, Bach, Werling, Hasson], A23
- pruritus control following opiates through continuous infusion plus self-administration of mu antagonists vs. mixed agonist-antagonists in post-caesarean section population [Kendrick, Birch, Woods], A941
- reduction of significant cardiac morbidity by morphine in non-cardiac surgery [Beattie, Buckley, Forrest], A71
- repeated, is it reliable in obstetric patients? [Narchi, Hamza, Julien, Lecoq], A954
- risk factors for postpartum backache associated with [Benlabeled, Hamza, Jullien, Troche, Lecoq], A996
- "smoother" pain control with, vs. patient-controlled IV morphine following joint replacement surgery [Weller, Rosenblum, Conard, Gross], A823
- spinal anesthesia vs., for elective cesarean section: effects on neonates [Ferrut, Lancon, Douvier, Marcoux, Caillard], A924
- sufentanil and morphine for post-caesarean delivery analgesia [Naulty, Parmet, Pate, Becker, Loeffler, Barnes], A965
- sufentanil during thoracotomies, analgesic effect of,: comparison with bupivacaine and saline [Haak-van der Lely, van Kleef, Gesink-van der Veer, Burm, Bovill], A770
- thoracic, associated with general anesthesia, ephedrine vs. phenylephrine for hypotension due to,: effects on left ventricular function [Samain, Coriat, LeBret, Baron, Vrints, Viars], A82
- thoracic, is not preferable to general anesthesia in high risk surgical patients [Baron, Bertrand, Barre, Godet, Coriat, Viars], A807
- in vitro evaluation of relative perforation potentials of six catheters [Blackshear, Gravenstein, Wissler], A1046
- what position is more comfortable for parturient during induction of,? [Vincent, Chestnut, Russell, Walker, Ostman], A978
- where catheters go [Jain, Shah, Bedford], A842
- extubation**
- incidence of myocardial ischemia during weaning and, in high-risk surgical intensive care patients [Wang, Leibowitz, Halpern, Oropello, DiStefano, Abalos, Iberti], A525
- predictors of post-extubation stridor in pediatric trauma patients [Bishop, Kemper, Benson], A229
- hypotensive**
- acute, attenuation of baroreflex response to, by nitroprusside during intracoronary infusion of ATP [Taneyama, Goto, Nakazawa, Unruh, Arakawa], A650
- adenosine and sodium nitroprusside-induced, catecholamines and plasma renin activity during [Lam, Winn, Grady], A175
- adenosine-induced, total coronary resistance and vessel segment resistances during [Habazettl, Conzen, Christ, Baier, Vollmar, Peter, Brendel], A645
- controlled, esmolol and, adverse effects on oxygen extraction [Quinn, Zayas, LeDonne, McDonald, Pickering], A94
- conversion of sodium nitroprusside to its active vasodilator, nitric oxide, requires chemical reduction and release of cyanide [Bates, Baker, Harrison], A653
- deliberate, effect of cardiac output on CBF during [Ornstein, Young, Prohovnik, Ostapovich, Stein], A169
- deliberate, with nicardipine during spine fusion for scoliosis [Bernard, Pinaud, Francois, Souron], A1203
- enflurane-induced, blood flow to splanchnic organs and tissue oxygenation of liver and pancreas during, [Vollmar, Kerner, Vierl, Conzen, Habazettl, Waldner, Peter, Brendel], A614
- ephedrine vs. phenylephrine for, due to thoracic epidural anesthesia associated with general anesthesia: effects on left ventricular function [Samain, Coriat, LeBret, Baron, Vrints, Viars], A82
- epidural, epinephrine vs. phenylephrine: effects on renal autoregulation during [Zayas, Sharrock, Blumenfeld, McDonald, Sealey], A70
- esmolol vs. nitroprusside for, dose response during isoflurane anesthesia [DelValle, Edmondson, Reinsel, Shah, Herr, Bedford], A143
- ideal mixture of sodium nitroprusside and trimethaphan [Nakazawa, Taneyama, Benson, Goto, Arakawa], A618
- outcome analysis of, in hypertensive patients [Sharrock, Urquhart], A68
- hypothermia**
- effect of volatile anesthetics on hypothermic myocardium [Matheussen, Boutros, Van Aken, Flameng], A574
- effects of potassium variations and, on maximum diastolic potential [Laszlo, Sprung, Polic, Kampine, Bosnjak], A263
- halothane decreases ionic fluxes due to metabolic inhibition, ischemia or, in atrial muscle strips [Eckenhoff], A644
- hematologic and morphologic alterations after protective deep hypothermic circulatory arrest of 1-2h in dogs [Radovsky, Tisherman, Safar, Sterz, Kuboyama], A275

- human pupillary light reflex during [Larson, Sessler], A214
- mild, effect of: multifocal cerebral blood flow and global metabolism after prolonged cardiac arrest in dogs (34°C) [Oku, Kuboyama, Safar, Johnson, Sterz, Obrist, Leonov, Tisherman], A302
- pH management during hypothermic cardiopulmonary bypass does not influence cerebral oxygen consumption [Murkin, Sharpe, Farrar], A117
- prolongation of permissible hypothermic circulatory arrest time in dogs [Mazzoni, Wolfe, Shiang, Lansman, Ergin, Griep], A622
- reactive hyperemia after hypothermic circulatory arrest in dogs [Mazzoni, Mezrow, Green, Shiang, Kugler, Griep], A623
- reduces capacity for fibrinolysis in human plasma [Clark, Carr], A164
- transient hypothermic reperfusion improves recovery of cerebral electrical activity after normothermic cerebral ischemia [Baldwin, Kirsch, Hurn, Young, Traystman], A557
- usefulness of somatosensory evoked potential monitoring to determine appropriate level of [Mazzoni, Griep], A529
- improved neurologic outcome using naloxone and spinal fluid drainage in surgery of thoracoabdominal aorta [Wynn, Archer], A64
- induction**
- chewing gum preoperatively may warrant delay of [Dubin, Jense, Moore], A46
- comparison of methods of, preoxygenation and denitrogenation [Chekan, Weber, Wickas], A442
- effect of preinduction alfentanil on blood pressure and heart rate on laryngoscopy [Joseph, Assil], A49
- with desflurane: comparison of conventional and vital capacity rapid inhalation techniques [Kelly, Hartman, Embree, Artusio], A51
- inhalation**
- simple catheter extension improves delivery efficiency of metered dose inhalers: a quantitative evaluation [Peterfreund], A486
- intercostal**
- influence of local anesthetic volume on spread of [Moorthy, Yaw, Dierdorf, Young, Schmidt], A802
- mechanism of Horner's syndrome resulting from epidural, caudal, interpleural, sympathetic and, nerve blocks [Shantha], A192
- interpleural**
- mechanism of Horner's syndrome resulting from epidural, caudal, intercostal, sympathetic and, nerve blocks [Shantha], A192
- intravenous**
- fentanyl plus lidocaine vs. lidocaine for bier block [Arthur, Heavner, Mian, Rosenberg], A838
- total, comparison of midazolam and propofol in combination with alfentanil for [Vuyk, Hennis, Burm, de Voogt, Spierdijk], A325
- total, with propofol and without intubation for magnetic resonance imaging in pediatric patients [Vangerven, Wouters, Vandermeersch, Van Aken], A1239
- neurolept**
- droperidol dose-response in outpatients following alfentanil-N<sub>2</sub>O anesthesia [Mingus, Zahl, Bradford, Kroening, Eisenkraft], A34
- plasma catecholamine and dopamine concentration during coarctation repair: isoflurane vs. [Schmitt, Knoll, Danner], A57
- nicardipine**
- deliberate hypotension with, during spine fusion for scoliosis [Bernard, Pinaud, Francois, Souron], A1203
- nitroprusside**
- attenuation of baroreflex response to acute hypotension by, during intracoronary infusion of ATP [Taneyama, Goto, Nakazawa, Unruh, Arakawa], A650
- conversion of, to its active vasodilator, nitric oxide, requires chemical reduction and release of cyanide [Bates, Baker, Harrison], A653
- ideal mixture of, and trimethaphan [Nakazawa, Taneyama, Benson, Goto, Arakawa], A618
- oral transmucosal fentanyl citrate: oral transmucosal vs. gastrointestinal absorption [Streisand, Tarver, Varvel, Demmink, Hauge], A369
- paracervical**
- propofol anesthesia vs., for outpatient legal abortion [Raeder], A25
- rectal**
- intranasal ketamine vs., as premedicants in children [Tsai, Mok, Lippmann], A1094
- regional**
- brachial plexus blockade vs. general anesthesia for orthopedic operation on upper extremity, in outpatients [Baysinger, Bowe, Sykes], A43
- butorphanol vs. fentanyl and fentanyl+midazolam for ambulatory patients: double-blind randomized study [Philip, Muschlin, Cnaan, Bizzarri-Schmid, Courtney, Dedrick], A39
- celiac plexus block for therapy of gastrointestinal dysfunctions in neurosurgical ICU patients [Weinstabl, Proges, Plainer, Werba, Spiss], A843
- cervical block, lidocaine and bupivacaine dosages in, for carotid endarterectomy [Goursot, Mazoit, Dufieux, Bismut, Carrat], A822
- continuous interscalene analgesia vs. patient control analgesia for shoulder surgery [Ali, Dobkowski, Komar, Hawkins, Varkey], A828
- deep and superficial cervical plexus block with bupivacaine for carotid endarterectomy: pharmacokinetic study [Debaene, Elman, Squalli, Jolis, Mazoit], A782
- does interpleural local anesthetic administration produce a sympathetic block? [Pelligrino, Laurito, Albrecht], A755
- duration of block and analgesia after brachial plexus anesthesia with mepivacaine: effect of clonidine added to anesthetic solution [Singelyn, Gouverneur], A797
- effects of interpleural bupivacaine (0.5%) on canine diaphragmatic function [Kowalski, Bradley, Greengrass, Freeman, Younes], A1191
- effects of intramuscular or local clonidine for prolongation of brachial plexus block with lidocaine [Wyss, Karrp, Mons, Bellhacen, Alame, Ruelle], A821
- fentanyl plus lidocaine vs. lidocaine for bier block [Arthur, Heavner, Mian, Rosenberg], A838
- fluoroscopy or CT scan for celiac plexus block? [Jain, Shah, Bedford], A794
- general anesthesia vs., for inguinal herniorrhaphy [Behnia, Poticha, Hashemi, Ujicki], A52
- ilioinguinal nerve blocks: an alternative or supplement to intrathecal morphine? [Witkowski, Leighton, Norris], A962
- intercostal block, influence of local anesthetic volume on spread of [Moorthy, Yaw, Dierdorf, Young, Schmidt], A802
- interpleural bupivacaine analgesia during and after hepatic artery chemoembolization [Meakem, Frink, Fajardo, Pond], A814
- interscalene brachial plexus block for shoulder surgery: significance of paresthesia site [Roch, Sharrock, Neudachin], A849
- lumbar sympathetic block, anterior psoas sheath identification for [Sprague, Ramamurthy], A854

- lumbar sympathetic block: new rapid single needle technique utilizing radiography [Reddy, Chinthagada, Rao], A857
- optimum concentration of bupivacaine for balanced general/caudal anesthesia in children [Gunter, Dunn, Bennie, Pentecost, Bower, Ternberg], A1237
- outpatient brachial plexus anesthesia [Davis, Lennon, Wedel], A26
- perioperative body temperature regulation in general anesthesia vs. [Frank, Crowley, Parker, Christopherson, Williams, Rock, Perler, Beattie], A785
- plethysmographic pulse oximetry: a teaching tool in lumbar sympathetic blockade [Ngeow, Shay, Neudachin], A1086
- presacral blockade of ganglion of walter (ganglion impar) [Planarte, Amescua, Patt, Allende], A751
- propofol anesthesia vs. paracervical blockade for outpatient legal abortion [Raeder], A25
- general anesthesia vs., in outpatients [Bowe, Baysinger, Sykes, Bowe], A44
- relationship of retrobulbar local anesthetic spread to neural membranes of eyeball, optic nerve and arachnoid villi in optic nerve [Shantha], A850
- role of brachial plexus block after negative response from stellate ganglion block for RSD [Durrani, Winnie], A837
- retrobulbar**
- relationship of spread of, to neural membranes of eyeball, optic nerve and arachnoid villi in optic nerve [Shantha], A850
- shoulder**
- continuous interscalene analgesia vs. patient control analgesia for [Ali, Dobkowski, Komar, Hawkins, Varkey], A828
- interscalene brachial plexus block for, significance of paresthesia site [Roch, Sharrock, Neudachin], A849
- spinal**
- bupivacaine, epinephrine improves quality of [Carpenter, Smith, Guinard], A757
- continuous subarachnoid sufentanil for labor analgesia [Naulty, Barnes, Becker, Pate], A964
- effect of, in geriatric patients with heart disease: choice of vasopressor therapy to reverse hemodynamic changes [Rooke, Freund, Jacobson, Cerqueira], A140
- effect of, in geriatric patients with heart disease: hemodynamic and blood volume profile [Rooke, Freund, Jacobson, Cerqueira], A139
- effect of volume of hyperbaric tetracaine on level of [Hecker, Kingsley], A819
- epidural and, changes in body oxygen consumption during recovery from [Constant, Bonnet], A808
- epidural vs., for elective cesarean section: effects on neonates [Ferrut, Lancon, Douvier, Marcoux, Caillard], A924
- evaluation of A22G compatible (28G) continuous spinal catheter [Krejcie, Leifheit, Ovassapian], A856
- hyperbaric bupivacaine and lidocaine for cesarean section: a pilot study [Jassy, Tom], A982
- hypotension, predictive signs of, following, for cesarean section [Casteil, Blanot, Lienhart], A991
- ilioinguinal nerve blocks: an alternative or supplement to intrathecal morphine? [Witkowski, Leighton, Norris], A962
- implantation of spinal cord stimulators using [Boswell, Iacono], A188
- intrathecal clonidine and response to hemorrhage [Eisenach], A758
- intrathecal clonidine-induced hypotension, site of [Eisenach], A754
- intrathecal meperidine for labor analgesia [Norris, Boreen, Leighton, Mingey, Kent], A983
- intrathecal midazolam, neurotoxicity of, in rabbits [Malinovsky, Mussini, Cozian, Lepage, Pinaud], A677
- intrathecal midazolam and fentanyl, antinociceptive effect of, in sheep [Arkoosh, Norris], A1260
- intrathecal morphine, disposition and respiratory effects of, in children [Nichols, Yaster, Deshpande, Helfaer, Lynn, Bezman, Tobias], A1135
- intrathecal morphine, effect on incidence of spinal headache [Abboud, Reyes, Zhu, Steffens, Afrasiabi, Miller, Afrasiabi, Sherman], A937
- intrathecal morphine, pharmacokinetics of, in cesarean section patients [Zakowski, Grant, Khoo, Ramanathan, Turndorf], A946
- intrathecal morphine and post-dural headache [Carney, Weiss, Norris, Leighton], A949
- intrathecal morphine reduces post thoracotomy meperidine requirements [Cohen, Neustein, Ali, Thys], A801
- intrathecal narcotics for labor: efficacy of morphine 0.5 mg, 0.75 mg, 1.0 mg, combined with fentanyl 25 mcg [Mankad, Seggaers, Pickard, Dark-Mezick, Shah], A1001
- intrathecal sufentanil for labor analgesia: results of a pilot study [Leicht, Evans, Durkan], A981
- intrathecal tizanidine and morphine, cross-tolerance and synergy between [Lubenow, McCarthy, Penn, Ivankovich], A1261
- lateral position during, influence of duration of, on distribution of hyperbaric tetracaine [Salvaj, Gamulin, Schweizer, Fors-ter], A852
- midazolam and, exert antagonistic effects on CO<sub>2</sub> response [Gauthier, Chung, Dyck, Romanelli, Chapman], A846
- mu opioid agonists, differences in intrinsic efficacy of, in production of analgesia [Yaksh, Mjanger, Crone], A786
- nalbuphine in patients receiving low dose intrathecal morphine: prospective double blind evaluation [Chebuhar, Sigurdsson, From, Choi, Anderson], A772
- nalmefene for reversal of respiratory depression secondary to intrathecal morphine [Lowdon, Yeung, Isaacson, Bikhazi, Grunow], A385
- perioperative analgesia with subarachnoid sufentanil-bupivacaine [Courtney, Badner, Hartwell, Hauch, Datta], A994
- post-dural headache, incidence of, after subarachnoid block for postpartum tubal ligation, comparison of 26 vs. 30 g needles [Herman, Knape, Husain, Karuparth, Downing], A972
- post-dural puncture headache, efficacy of intravenous caffeine for [Abboud, Zhu, Reyes, Steffens, Afrasiabi, Gendein], A936
- post-dural puncture headache, incidence of, in cesarean section patients using 24-G Sprotte needle [Sears, Leeman, O'Donnell, Kelleher, Santos], A1003
- postoperative analgesia after intrathecal fentanyl-lidocaine for postpartum tubal ligation surgery [Durkan, Leicht, Evans], A932
- postoperative analgesia with continuous intrathecal lidocaine infusion [Bevacqua, Slucky, Adusumilli], A833
- is postoperative intrathecal catheter use associated with CNS infections? [Bevacqua, Slucky, Nemec], A791
- post-spinal headache, incidence of, after continuous subarachnoid analgesia for labor using a 32g microcatheter [Benedetti, Chadwick, Mancuso, Ross, Tiengo], A922
- respiratory sinus arrhythmia analysis during, evaluation of vagal tone in relation to anesthetic level [Baeuerle, Fox, Menk, Kingsley, Dellinger], A510
- risk factors associated with postpartum backache in obstetric patients [Lecoq, Hamza, Narchi, Jullien, Attane], A966
- subarachnoid blockade vs. general anesthesia for knee arthroscopy in outpatients [Bowe, Baysinger, Sykes, Bowe], A45
- subarachnoid EDTA induces hindlimb myoclonus in rats [Wang, Li, Hiller, Simon, Dubzilovich, Hillman, Turndorf], A1259

- 27-gauge needles for ambulatory surgery patients [Kang, Good-nough, Lee, Olson, Krueger], A2
- 28g continuous spinal catheters to administer fentanyl to manage labor pain: a dose finding study [El-Naggar, Farag, Kartha], A970
- 3 ml of 0.125% bupivacaine for orthopedic procedures in elderly patients [Labaille, Benhamou, Westerman], A830
- stellate ganglion**  
role of brachial plexus block after negative response from, for RSD [Durrani, Winnie], A837
- sufflation**  
continuous endobronchial insufflation during median sternotomy [Watson, Szarko, Sequeira, Mackenzie, Mark], A1192
- sympathetic block**  
lumbar, anterior psoas sheath identification for [Sprague, Ramamurthy], A854  
lumbar, new rapid single needle technique utilizing radiography [Reddy, Chinthagada, Rao], A857  
plethysmographic pulse oximetry: teaching tool in [Ngeow, Shay, Neudachin], A1086
- trimethaphan**  
ideal mixture of sodium nitroprusside and [Nakazawa, Taneyama, Benson, Goto, Arakawa], A618
- triphosphate**  
attenuation of baroreflex response to acute hypotension by nitroprusside during intracoronary infusion of ATP [Taneyama, Goto, Nakazawa, Unruh, Arakawa], A650
- Angiotensin. See under Polypeptides**
- Anoxia. See under Brain**
- Antacids. See under Gastrointestinal tract**
- Antagonists, miscellaneous**  
**benzodiazepines**  
effect of flumazenil on anesthesia induced by flunitrazepam, ketamine, etomidate or thiopental [Mok, Steen, Wei, Cheng], A134  
effect of midazolam and flumazenil on activity of cardiac sympathetic branch [Kimura, Shitaokoshi, Komatsu, Takezawa, Shimada], A397  
effects of midazolam and flumazenil on coronary circulation and contractility of isolated rabbit heart [Samain, Baron, Mouren, Dreux, Soughir, Viars], A642  
flumazenil after sufentanil-midazolam anesthesia [Isner, Cork, Scipione], A53  
midazolam and flumazenil decrease vascular tone in isolated dog saphenous vein preparation [Glisson], A660  
pharmacokinetic-pharmacodynamic modeling of interaction between flumazenil and midazolam with aperiodic EEG analysis in volunteers [Breimer, Burm, Hennis, Danhof, Bovill], A195  
RO-15-1788 antagonizes cardiovascular depressant effect of lorazepam [Nakazawa, Ohara, Taneyama, Unruh, Arakawa], A619
- flumazenil**  
effect of midazolam and, on activity of cardiac sympathetic branch [Kimura, Shitaokoshi, Komatsu, Takezawa, Shimada], A397  
effects of midazolam and, on coronary circulation and contractility of isolated rabbit heart [Samain, Baron, Mouren, Dreux, Soughir, Viars], A642  
midazolam and, decrease vascular tone in isolated dog saphenous vein preparation [Glisson], A660  
pharmacokinetic-pharmacodynamic modeling of interaction between midazolam and, with aperiodic EEG analysis in volunteers [Breimer, Burm, Hennis, Danhof, Bovill], A195
- Antagonists, narcotic**  
antagonism of postoperative respiratory depression caused by large doses of morphine [Radvanyi, Marin, Bikhazi, Foldes], A1173
- nalmefene**  
pharmacokinetics of, an opioid antagonist [Levinson, Reynolds, Kisicki, Lee], A356  
for reversal of respiratory depression secondary to intrathecal morphine [Lowdon, Yeung, Isaacson, Bikhazi, Grunow], A385
- naloxonazine**  
blocks alfentanil-induced analgesia but not muscle rigidity in rat [Weinger, Broonson, Furst, Pasternak], A331
- naloxone**  
comparison of nalmefene with, against fentanyl-produced antinociception in rats [Ossipov, Harris, Messineo, Spaulding, Levinson, Jerussi], A330  
effect of meperidine and, on cold-induced shivering [Cooper, McMurray, Pavlin, Schoene, Freund], A230  
potentiates inotropic but not chronotropic effects of isoproterenol in vitro [Lechner], A587
- Antagonists, neuromuscular relaxants. See also Neuromuscular relaxants**  
age does not change dynamics of atracurium reversal [Muravchick], A384
- edrophonium**  
reversal of pipcuronium- and pancuronium-induced neuromuscular block by pyridostigmine and [Gyermek, Lee], A874  
effects of isoflurane anesthesia residual levels on reversal of vecuronium-induced neuromuscular blockade [Baurain, Melot, d'Hollander, Bernovoi, Barvais], A895
- methylguanidine**  
reversal of d-tubocurarine block by combination of neostigmine and, in vivo [Watanabe, Nagashima, Ohta, Foldes], A889
- neostigmine**  
effects of concentration of isoflurane on recovery of pipcuronium neuromuscular blockade following [Meistelman, Plaud, Lira, Donati], A886  
effects of different dosages of atropine, mixed with a fixed dose of, on reversal of vecuronium-induced neuromuscular blockade [Baurain, Bernovoi, d'Hollander, Barvais], A896  
reversal of d-tubocurarine block by combination of methylguanidine and, in vivo [Watanabe, Nagashima, Ohta, Foldes], A889
- pyridostigmine**  
reversal of pipcuronium- and pancuronium-induced neuromuscular block by edrophonium and [Gyermek, Lee], A874
- Antibiotics. See under Neuromuscular function**
- Anticoagulants. See under Blood**
- Anticonvulsants**  
pulmonary and, effect of endotracheally-administered midazolam in a model of status epilepticus [Rothenberg, Jones, Dainauskas, McCarthy], A233
- Antidiuretic hormones. See under Hormones**
- Antiemetics. See under Vomiting**
- Antipyrine. See under Pharmacology**
- Aorta. See under Arteries**
- Aprotinin. See under Blood; Pharmacology**
- Arrest, cardiac. See under Complications**
- Arrhythmia. See under Heart**
- Arteries**  
**Allen's Test**  
modified, pulse oximetry and, vs. Doppler ultrasound: assessment of collateral circulation in hand of patients undergoing major cardiovascular surgery [Raffin, Michel-Cherqui, Ambros, Saint-Marc, de Tovar], A1066  
modified, digital blood pressure, plethysmography, and oximetry

as determinants of collateral blood flow to hand, comparison of [Fuhrman, Reilley, Pippin], A228

#### aorta

- alteration of vascular responsiveness to isoflurane and halothane by endothelium [Brian, Seifen, Kennedy], A641
- halothane attenuates both receptor and nonreceptor mediated EDRF production in rat thoracic aorta [Uggeri, Johns], A604
- halothane-induced peripheral vasodilatation may be dependent on endothelium-derived relaxing factor [Miletich, Koenig, Albrecht], A600

#### cannulation

- radial artery, difficult, predictors of [Bennett, Lichtenthal, Shanks], A111
- radial artery, long-term, thrombogenic risk of: evaluation by multivariate discriminant analysis [Martin, Lambert, Sureau, Boneru, Gouin], A1028

#### carotid

- acute vasodilatory effect of tumor necrosis factor on rabbit [Philip, Bernard, Bousseau, Payen, Tedgui], A662
- alteration of vascular responsiveness to isoflurane and halothane by endothelium [Brian, Seifen, Kennedy], A641
- cerebral vasoactive effects of MK-801, an excitatory amino acid inhibitor [Zhang, Hamilton, Gelb], A692
- diabetes-induced sensitivity of aortic contraction to phenylephrine is time and endothelium dependent [Chang, Stevens, Lacy], A559

lidocaine alters flow-mediated changes in large arteries in humans [Duranteau, Edouard, Demoulis, Prussard, Berdeaux], A123

#### radial

- assessment of collateral circulation in hand of patients undergoing major cardiovascular surgery: modified Allen's Test and use of pulse oximetry vs. Doppler ultrasound [Raffin, Michel-Cherqui, Ambros, Saint-Marc, de Tovar], A1066
- predictors of difficult cannulation [Bennett, Lichtenthal, Shanks], A111
- thrombogenic risk of long-term cannulation: evaluation by multivariate discriminant analysis [Martin, Lambert, Sureau, Boneru, Gouin], A1028
- role of endothelium in modulating vasodilation induced by isoflurane in rabbit basilar artery [Jensen, Todd, Kramer, Leonard, Warner, Bollen], A648

**Artificial heart.** *See under Heart*

**Asphyxia.** *See under Complications*

**Aspiration.** *See under Complications; Lungs*

**Asthma.** *See under Complications*

**Atelectasis.** *See under Lungs*

**Atracurium.** *See under Neuromuscular relaxants*

**Atria.** *See under Heart*

**Atrial natriuretic factor.** *See under Polypeptides*

**Atropine.** *See under Premedication*

**Autotransfusion.** *See under Transfusion*

## B

**Bacteremia.** *See under Infections*

**Balanced anesthesia.** *See under Anesthetic techniques*

**Barbiturates.** *See under Hypnotics*

**Benzodiazepines.** *See under Anesthetics, intravenous; Antagonists, miscellaneous; Hypnotics*

**Benzonate.** *See under Anesthetics, local*

**Beta-adrenergic agonists.** *See under Sympathetic nervous system*

**Beta-adrenergic antagonists.** *See under Sympathetic nervous system*

**Bicarbonate.** *See under Acid-base equilibrium*

**Block, nerve.** *See under Nerves*

**Blockade.** *See under Sympathetic nervous system*

## Blood

### anemia

- does it increase risk of postoperative apnea in former preterm infants? [Welborn, Hannallah, Higgins, Fink, Luban], A1091

### anticoagulants

- heparin: a myocardial depressant? [Lee, Virtussio, Lin, Wu], A605

### aprotinin

- mechanisms of bleeding reduction induced by, during cardiopulmonary bypass: a controlled study [Commin, Lu, Soria, Caen, Piwnica, Echter], A1205

### coagulation

- effect of leukopenia on pulmonary hypertension following heparin-protamine in pigs [Habazettl, Conzen, Yekebas, Vollmar, Hobbhahn, Peter, Brendel], A646
- evaluation of a portable monitor in cardiac surgical patients [Despotis, Poler, Heerdt, Lappas], A502
- heparin and prostacyclin in predilutional hemofiltration [Legat, Steltzer, Hufnagl, Zekert, Zimpfer], A253
- heparin management protocol for cardiopulmonary bypass does not influence postoperative bleeding [Gravlee, Rogers, Dudas, Whitaker, Case], A114
- hypothermia reduces capacity for fibrinolysis in human plasma [Clark, Carr], A164
- incidence of anti-protamine antibody in vasectomized males [Adourian, Fuchs, Adkinson, Hirshman], A1257
- influence of heparin and citrate on quality of preop washed autotransfused platelets and red blood cells [Mortelmans, Vermaut, Van Aken, Goossens], A496
- influence of hydroxyethylstarch on, in neurosurgery [Claes, Vangerven, Arnout, Vermeylen, Van Aken], A1222
- is thromboelastograph a clinically useful predictor of blood loss after bypass? [Van Riper, Horrow, Osborne], A1205
- is thromboelastography useful for evaluation of coagulopathies in high-risk parturients? [Campbell, Nahrwold], A993
- mechanisms of bleeding reduction induced by aprotinin during cardiopulmonary bypass: a controlled study [Commin, Lu, Soria, Caen, Piwnica, Echter], A1205
- multiple dose administration of DDAVP in uncomplicated cardiac surgery [Marquez, Koehler, Strelec, Benckart, Cottington, Torepy], A1204
- protamine induces adverse metabolic effects [Hantler, Wakefield, Wroblewski, Crider, Stanely], A112
- role of benzyl alcohol preservative in heparin-induced hypotension prior to cardiopulmonary bypass [Kelleher, Smith, Hull, Blomberg, Ruff], A130
- thromboelastographic evaluation of effect of cell saver blood on, in post cardiopulmonary bypass patient [Weiss, McNulty, Schmitz], A83

### desmopressin

- multiple dose administration of DDAVP in uncomplicated cardiac surgery [Marquez, Koehler, Strelec, Benckart, Cottington, Torepy], A1204

### erythrocytes

- influence of heparin and citrate on quality of preop washed autotransfused platelets and red blood cells [Mortelmans, Vermaut, Van Aken, Goossens], A496

### fluorocarbon

- trifluoroacetylated proteins in livers of rats treated with potential chlorofluorocarbon replacement [Martin, Harris, Anders, Pohl], A348

### hemodilution

- acute, validity of microsphere determinations of cerebral blood flow during, in cats [DeWitt, Deal, Vines, Prough], A656
- cardiac output and its distribution in dogs hemodiluted with 5%



- albumin or 10% hemoglobin [Rooney, Wat, Hirsch, Mathru, Rao], A659
- effect of elective cardiopulmonary bypass surgery and hemodilution on serum erythropoietin levels and erythropoiesis [D'Ambra, Risk, Schneider, Vlahakes, Lynch], A106
- effects of, on retinal blood flow in cats [Roth, Crittenden], A652
- effects of anesthesia and, on regional function of compromised myocardium [Leone, Spahn, McRae, Smith], A596
- effects of hematocrit on O<sub>2</sub> tissue extraction capabilities [Van der Linder, Engelman, Gilbert, Paques, Simon, Vincent], A640
- extreme, gas exchange during, in humans [Mathru, Kleinman, Blakeman, Dries, Rao], A237
- extreme, myocardial adaptation during, in humans [Mathru, Kleinman, Dries, Blakeman, Zecca], A236
- for heart surgery in children [Rosen, Rosen, Bove, Callow, Wilton], A1242
- influence of dobutamine on relationship between O<sub>2</sub> delivery and O<sub>2</sub> consumption during anesthesia and [Janvier, Payen, Dardel, Mary], A159
- normovolemic, effects of isoflurane on splanchnic oxygenation during [Noldge, Priebe, Schmidt, Kopp, Geiger], A546
- normovolemic, independent simultaneous measurement of oxygen consumption and delivery during [Ciofalo, Baron, Arthaud, Viars], A80
- normovolemic, severe, does it adversely affect splanchnic oxygenation? [Noldge, Priebe, Buttler, Muller, Armbruster, Geiger], A609
- O<sub>2</sub> delivery and O<sub>2</sub> consumption under general anesthesia and [Janvier, Guenard, Winnock, Vallet, Dugrais], A163
- hemoglobin**
- CO-Hb in 1000 smokers and nonsmokers: biological half life of CO-Hb, and consequences of pulseoximetry [Deller, Forstner, Stenz, Schreiber, Fösel], A507
- heparin**
- effect of leukopenia on pulmonary hypertension following heparin-protamine in pigs [Habazettl, Conzen, Yekebas, Vollmar, Hobbhahn, Peter, Brendel], A646
- hypotension induced by, role of benzyl alcohol preservative in, prior to cardiopulmonary bypass [Kelleher, Smith, Hull, Blomberg, Ruff], A130
- influence of citrate and, on quality of perop washed autotransfusional platelets and red blood cells [Mortelmans, Vermaut, Van Aken, Goossens], A496
- management protocol for cardiopulmonary bypass, does not influence postoperative bleeding [Gravlee, Rogers, Dudas, Whitaker, Case], A114
- myocardial depressant? [Lee, Virtussio, Lin, Wu], A605
- prostacyclin and, in predilutional hemofiltration [Legat, Steltzer, Hufnagl, Zekert, Zimpfer], A253
- leukocytes**
- effect of leukopenia on pulmonary hypertension following heparin-protamine in pigs [Habazettl, Conzen, Yekebas, Vollmar, Hobbhahn, Peter, Brendel], A646
- inhibition of platelet activating factor release by magnesium sulfate in guinea pig alveolar macrophages [Tapia, Hursh, Karth], A740
- pharmacology**
- trifluoroacetylated proteins in livers of rats treated with potential chlorofluorocarbon replacement [Martin, Harris, Anders, Pohl], A348
- platelets**
- activating factor release by magnesium sulfate, inhibition of, in guinea pig alveolar macrophages [Tapia, Hursh, Karth], A740
- aggregation, intravenous clonidine does not promote hypoxemia and, in man [DeKock, Singelyn, Gouverneur], A316
- aggregation, volatile anesthetics and, in pigs and humans [Bertha, Sill, Plumhoff, Bowie, Nelson], A586
- perop washed autotransfusional red blood cells and, influence of heparin and citrate on quality of [Mortelmans, Vermaut, Van Aken, Goossens], A496
- receptors for adhesive legands are decreased during cardiopulmonary bypass [Rinder, Rinder, Ault, Smith], A74
- trapping in intestine, multiple organ failure and, critically ill patients [Sigurdsson, Christenson, Bader, Sadek], A258
- protamine**
- effect of leukopenia on pulmonary hypertension following heparin-protamine in pigs [Habazettl, Conzen, Yekebas, Vollmar, Hobbhahn, Peter, Brendel], A646
- incidence of anti-protamine antibody in vasectomized males [Adourian, Fuchs, Adkinson, Hirshman], A1257
- induces adverse metabolic effects [Hantler, Wakefield, Wroblewski, Crider, Stanely], A112
- replacement**
- predeposited autologous blood use reduces frequency of homologous blood transfusion without hemodynamic compromise in cardiac surgery patients [Samule, Geary, Moberg, Sheikh, Lumb], A102
- Blood-brain barrier. See under Brain**
- Blood flow. See under individual organs; also Measurement techniques**
- Blood pressure. See also Measurement techniques; Monitoring**
- changes in heart rate variability correlate with decreases in [Latson, Martin, Whitten, Hyndman, Elmore], A1207
- comparison of the ability of esmolol and alfentanil to attenuate tachycardia and hypertension during emergence from inhalational anesthesia [Ewell, Fuhrman, Pippin, Weaver], A108
- hemodynamic response to induction of intravenous anesthesia supplemented with pentamorphone or fentanyl [Varlotta, Robertson], A56
- hypertension**
- induced, during restoration of flow after temporary middle cerebral artery occlusion in rat: effect on brain injury and edema [Patel, Drummond, Cole], A722
- intraoperative, prophylactic effect of intravenous enalaprilat on [Heropoulos, Schieren, Seltzer, Bartkowski, Lessin, Torjman, Goldberg], A92
- isradipine for treatment of, during abdominal surgery [Dartayet, Edouard, Samii], A142
- perioperative, therapeutic role of esmolol in, in ambulatory surgery [Dimich, Singh, Sampson, Pratilas, Sonnenklar], A12
- sternotomy-induced, urapidil for treatment of [Marty, Pansard, Lancon], A88
- hypotension**
- esmolol ablates adrenal medullary response to [Dickstein, Jordan, Miller], A548
- secondary hypotensive insults in rat forebrain ischemia model [Reasoner, Warner, Todd, Ramani, McAllister], A728
- measurement**
- comparison of digital BP, modified Allen's test, plethysmography, and oximetry as determinants of collateral blood flow to hand [Fuhrman, Reilley, Pippin], A228
- noninvasive continuous estimate of cardiac output derived from Finapres wave form [Gratz, Kraidin, deCastro, Jacobi, Spagna], A475
- receiver operating characteristic curve helps optimize BP detection algorithms [Sittig, Clyman, Cheung, Miller], A456

- right and left arm BP discrepancies in vascular surgery patients [Frank, Norris, Crowley, Christopherson, Beattie], A105
- systolic pressure variation may unmask acute left ventricular ischemic dysfunction upon weaning from cardiopulmonary bypass [Perel, Koman, Geva, Smolinsky], A137
- Blood solubility.** *See under Solubility*
- Body temperature.** *See under Temperature*
- Brachial plexus blockade.** *See under Anesthetic techniques*
- Bradycardia.** *See under Heart*
- Brain**
- anoxia**
- ATP does not correlate with recovery after thiopental and, in rat hippocampus [Kass, Cottrell, Chambers], A673
- effect of MK-801 on CBF during focal cerebral ischemia [Drummond, Ruta, Cole], A681
- pattern of brain tissue concentrations of glutamine, aspartate, glycine and dopamine with varying durations of global cerebral ischemia in rabbit [Baker, Zornow, Scheller, Yaksh], A675
- thiopental attenuates anoxia-induced Na and K concentration changes in rat hippocampal slice [Abramowicz, Kass, Cottrell], A685
- appraisal of quality of assessment of memory in anesthesia and psychopharmacology literature [Ghoneim, Ali, Block], A210
- blood**
- hematologic and morphologic alterations after protective deep hypothermic circulatory arrest of 1–2h in dogs [Radovsky, Tisherman, Safar, Sterz, Kuboyama], A275
- blood-brain barrier**
- effects of isoflurane anesthesia on transport of [Chi, Anwar, Sinha, Weiss], A682
- blood flow**
- alpha-stat vs. Ph-stat: effect of varying bypass flow rate on [Hindman, Funatsu, Harrington, Kutcomp, Miller, Chun, Todd, Tinker], A570
- barbiturate attenuation of agonist affinity in cerebral arteries correlates with lipid solubility [Germann, Laher, Bevan], A339
- cardiopulmonary bypass and total circulatory arrest alters cerebral metabolism in infants, children [Greeley, Kern, Ungerleider, Quill, Baldwin, Reves], A91
- CBF response to isoflurane following brain injury in rabbit [Ramani, Todd, Warner], A680
- cerebral autoregulation during cardiopulmonary bypass is temperature dependent in infants [Taylor, Burrows, Bissonnette], A72
- cerebral hemodynamic response to progesterone [Schwalbe, Lu, Marx, Gibson, Goldiner], A938
- cerebral hemodynamics during hypothermic low flow bypass [Pilato, Hickey], A1244
- cerebral metabolism and, are independent of pump flow rate during hypothermic cardiopulmonary bypass in children [Kern, Greeley, Ungerleider, Quill, Baldwin, Smith, Reves], A1107
- cerebral swelling and, in fulminant hepatic failure [Aggarwall, Yonas, Kang, Martin, Kramer, Obrist, Darby], A211
- cerebral vasodilating effect of sevoflurane vs. isoflurane [Lu, Gibson, Frost, Goldiner], A625
- cerebrovascular reactivity in diabetic rat [Pelligrino, Kipa, Albrecht], A748
- circulatory response to cerebral compression after  $\alpha$ -adrenergic and vasopressin blockade in fetal sheep [Takahashi, Harris, Koehler, Jones Jr., Traystman], A944
- comparison of CO<sub>2</sub> reactivity for middle cerebral artery velocities and, during anesthesia [Young, Massaro, Ornstein, Prohovnik, Mohr], A205
- comparison of curve analysis methodology for, during CPB [Wuill, Croughwell, Lu, Newmann, Greeley, Reves], A718
- correlation of transcranial Doppler and, in patients with postdural headaches [Stump, Bowton, Prough, Newman, Tegeler], A480
- does isoflurane affect cerebrovascular response to carbon dioxide in anesthetized children? [Leon, Bissonnette, Lerman], A1221
- does nitrous oxide affect velocity of, under neurolept anesthesia in children? [Leon, Bissonnette], A389
- dose-related changes in, and CMRO<sub>2</sub> during propofol infusions in rabbits [Ramani, Todd, Warner], A703
- effect of 1 MAC isoflurane on cerebrovascular response to increased or decreased cerebral perfusion pressure [McPherson, Derrer, Traystman], A1219
- effect of cardiac output on, during deliberate hypotension [Ornstein, Young, Prohovnik, Ostapovich, Stein], A169
- effect of extracorporeal membrane oxygenation on autoregulation of, in newborn lamb [Bender, Short, Walker, Jones, Traystman], A1226
- effect of halothane in low concentrations on cerebral metabolism and, in baboon [Brussel, Van Aken, Fitch], A178
- effect of MK-801 on, during focal cerebral ischemia [Drummond, Ruta, Cole], A681
- effects of esmolol on cerebral microcirculation [Peck, Lu, Statkus, Gibson, Frost], A626
- effects of propofol on cerebral and spinal cord blood flow autoregulation in rats [Werner, Hoffman, Segil, Miletich, Albrecht], A694
- effects of propofol on, in correlation to velocities of, in dogs [Werner, Hoffman, Kochs, Albrecht, Schulte am Esch], A556
- effects of sufentanil on CMRO<sub>2</sub> and velocity of, in dogs [Werner, Hoffman, Miletich, Albrecht, Schulte am Esch], A513
- factors influencing velocity of, during cardiopulmonary bypass [Renz, Karliczek, Beyer, Jepsen], A124
- fentanyl with nitrous oxide does not alter cerebral autoregulation or, compared to unanesthetized rats [Hoffman, Werner, Segil, Edelman, Miletich], A603
- induced hypertension during restoration of, after temporary middle cerebral artery occlusion in rat: effect on brain injury and edema [Patel, Drummond, Cole], A722
- influence of isoflurane vs. methohexitone on velocity autoregulation of, during cardiopulmonary bypass [Renz, Kalriczek, Kraus, Höche], A126
- interaction of fentanyl and nitrous oxide on cerebral and peripheral hemodynamics in newborn lambs [Yaster, Koehler, Traystman], A1117
- interaction of nicardipine and hypocapnic alkalosis on cerebral vasomotricity and intracranial pressure [Durand, Combes, Girardet], A196
- isoflurane effect on isolated canine cerebral vascular segments is not endothelium-dependent [Flynn, Bosnjak, Kampine], A577
- multifocal, and global metabolism after prolonged cardiac arrest in dogs: effect of mild hypothermia [Oku, Kuboyama, Safar, Johnson, Sterz, Obrist, Leonov, Tisherman], A302
- phlebotomy reverses hemodynamic consequences of aortic cross-clamping [Mutch, Thomson, Teskey, Thiessen, Rosenbloom], A630
- reactivity of, to CO<sub>2</sub> during halothane or isoflurane anesthesia for carotid endarterectomy [Young, Prohovnik, Correll, Ostapovich, Ornstein, Quest], A204

- reduction of hypoperfusion and prevention of EEG changes in trauma plus hemorrhagic shock using a kappa opiate antagonist [DeWitt, Whitley Prough], A698
- response of canine cerebral circulation to hyperventilation during anesthesia with desflurane [Lutz, Milde, Milde], A1212
- thiopental effect on, during carotid endarterectomy [Young, Prohovnik, Ostapovich, Correll, Ornstein], A170
- treatment of hypovolemic shock with hypertonic-hyperoncotic solutions: effects on [Dautermann, Schürer, Härtl, Berger, Murr, MeBmer, Baethmann], A277
- validation of xenon clearance as measure of, [Quill, Spahn, Lu, Kern, Greeley, McRae, Reves, Leone], A597
- validity of microsphere determinations of, during acute hemodilution in cats [DeWitt, Deal, Vines, Prough], A656
- vasopressin constricts peripheral but dilates cerebral arteries [Tong, Eisenach], A551
- velocity of, and intracranial pressure response to sufentanil: a dose response study [Slee, Lam, Winn], A176
- cerebral**
  - high concentrations of barbiturates can enhance neuronal injury in substrate-deprived cortical cell cultures [Giffard, Weiss, Choi], A693
- cognitive mechanism of amnesia produced by midazolam [Veselis, Reinsel, Alagesan, Heino, Bedford], A189
- vasoactive effects of MK-801, an excitatory amino acid inhibitor [Zhang, Hamilton, Gelb], A692
- convulsions**
  - effects of hyperglycemia on seizure-induced brain damage in rat [Kofke, Barmada, Rudy], A216
  - fentanyl-induced temporal lobe seizure activity recorded with epidural (including perihippocampal) electrodes [Tempelhoff, Bernardo, Modica, Edwards], A168
- cortex**
  - high concentrations of barbiturates can enhance neuronal injury in substrate-deprived cortical cell cultures [Giffard, Weiss, Choi], A693
- decrements in cognitive function following coronary artery surgery: prospective study [Murkin, Martzke, Sim, Buchan, Sharma], A115
- effect of cerebral perfusion pressure during cardiopulmonary bypass on neuropsychiatric outcome following coronary artery bypass grafting [Stanley, Smith, White, Morrison, Blumenthal, Burkner, Schniebolck, Newman, Croughwell, Reves], A93
- electroencephalography**
  - comparison of, during sevoflurane and isoflurane anesthesia [Watt, Ehlers, Scipione, Navabi], A171
  - computer-processed, for electroconvulsive therapy: issue of interrater reliability of seizure duration [Isley, Kafer, Mann, Kong, Gilmore, Golden], A467
  - for determining propofol requirement during neuroanesthesia [Van Hemelrijck, Tempelhoff, Jellish, White], A202
  - does it predict anesthetic depth better than cardiovascular variables? [Dutton, Smith, Smith], A532
  - effects during 'steady state' infusion of midazolam: development of acute tolerance? [Breimer, Burm, Danhof, Hennis, Spierdijk], A1213
  - fenatanyl-induced temporal lobe seizure activity recorded with epidural electrodes [Tempelhoff, Bernardo, Modica, Edwards], A168
  - frontal lead is sufficient to monitor effects of midazolam [Veselis, Reinsel, Alagesan, Heino, Bedford], A197
  - human, dose response to desflurane [Rampil, Lockhart, Eger, Weiskopf], A1218
  - as measure of thiopental anesthetic depth [Hung, Varvel, Shafer, Stanski], A391
  - midazolam amnesia: correlation with high-frequency power [Veselis, Reinsel, Heino, Alagesan, Bedford], A186
  - neural network estimation of anesthetic dose using [Watt, Navabi, Scipione, Hameroff, Maslana], A470
  - pharmacokinetic-pharmacodynamic modeling of interaction between flumazenil and midazolam with aperiodic analysis in volunteers [Breimer, Burm, Hennis, Danhof, Bovill], A195
  - processed, pacing artifacts create "pseudoischemia" in, in patients during cardiopulmonary bypass [Roy, Prough, Phipps], A526
  - propofol and spontaneous movements [Borgeat, Dessibourt, Popovic, Schwander], A194
  - propofol effects of, and relationship with plasma concentration during neurosurgery [Bendriess, Stoiber, Bendriess-Brusset, Dabadie, Erny], A203
  - reduction of hypoperfusion and prevention of changes in, in trauma plus hemorrhagic shock using a kappa opiate antagonist [DeWitt, Whitley Prough], A698
  - sufentanil decreases spectral edge frequency more than ketamine during hypothermic cardiopulmonary bypass [Silvay, Salter, Ostapovich, Reich, Zappulla], A201
  - transient hypothermic reperfusion improves recovery of cerebral electrical activity after normothermic cerebral ischemia [Baldwin, Kirsch, Hurn, Young, Traystman], A557
- evoked potentials**
  - auditory, neuronal oscillations in, indicate wakefulness during cesarean section [Schwender, Madler, Keller, Pöppel], A923
  - cortical magnetic, atracurium alteration of [Sloan, Erian], A215
  - cortical magnetic, vecuronium alteration of [Sloan, Erian], A174
  - effects of anesthetic induction dose of midazolam on, in primates [Ghaly, Kartha, Stone, Miles, Aldrete], A747
  - mid-latency auditory, and intraoperative wakefulness during general anesthesia with propofol, isoflurane, and flunitrazepam/fentanyl [Schwender, Madler, Keller, Pöppel], A180
  - neurogenic, anesthetic alterations of, in swine [Peterson, Short, Mongan], A209
  - neurogenic, effects of physiologic alterations on, in swine [Short, Peterson, Mongan], A207
  - somatosensory, effect of I-653 on [Black, Konstadt, Sami, Rao], A181
  - somatosensory, latency changes during hypothermic cardiopulmonary bypass [Ostapovich, Silvay, Salter, Zappulla], A200
  - somatosensory, monitoring of, in neurosurgical patients in sitting position [Marlar, Shamsi, Tausk, Eisenkraft], A199
  - somatosensory, usefulness of monitoring of, to determine appropriate level of hypothermia [Mazzoni, Grieppl], A529
  - transcranial magnetic-induced, effect of etomidate on, in primates [Ghaly, Stone, Kartha, Jaster, Aldrete], A746
- gamma-aminobutyric acid**
  - diethyl ether's enhancement of <sup>36</sup>Cl-flux through gaba-gated channel is not agonist-dependent [Quinlan, Firestone], A707
  - enhancement of gaba-activated chloride conductance in cultured rat hippocampal neurons by enflurane [Jones, Brooks, Harrison], A710
  - inhibition of gaba-receptor ligand binding by anesthetic alcohols: comparison with obtunding potencies [Crossley, Firestone], A750
  - vigabatrin protects against hypoxia in rats [Garcia, Bunegin, Albin], A742
- gross neurologic outcome in CABG patients managed with single or multiple aortic crossclamp: preliminary retrospective analysis [Scheller, Glina, Massei], A78
- hippocampus**
  - enhancement of gaba-activated chloride conductance in cultured rat hippocampal neurons by enflurane [Jones, Brooks, Harrison], A710

- rat, ATP does not correlate with recovery after anoxia and thiopental in [Kass, Cottrell, Chambers], A673
- rat Ca1, microdialysis measurements of arachidonic acid metabolites in, during transient cerebral ischemia [Benveniste, Hüttemeier, Brothers, Su, Watkins], A715
- subliminal concentrations of procaine and diethylaminoethanol reduce excitability, but not action potential amplitude of hippocampal pyramidal cells [Butterworth, Cole], A774
- thiopental attenuates anoxia-induced Na and K concentration changes in rat hippocampal slice [Abramowicz, Kass, Cottrell], A685
- tonic and phasic local anesthetic effects in rat hippocampal pyramidal cells [Butterworth IV, Cole], A763
- volatile anesthetics gate a novel chloride conductance in cultured post-natal rat hippocampal neurons [Yang, Zorumski], A714
- hormonal therapy in human brain-dead potential organ donors: comparative study [Mariot, Jacob, Voltz, Perrier, Strub], A246
- hypothalamus**
- preoptic region thermosensitive single unit neuronal activity is reduced by halothane [Poterack, Kampine, Schmeling], A689
- hypoxia**
- angiotensin converting enzyme inhibitor captopril improves neurologic outcome from incomplete ischemia rats [Werner, Hoffman, Kochs, Rabito, Albrecht], A695
- assessment of behavioural outcome following incomplete forebrain ischemia by T-maze performance in rats [Patel, Drummond, Langlais, Grafe, Cole], A729
- brain bioenergetics during cardiopulmonary resuscitation [Eleff, Schleien, Koehler, Shaffner, Eberle, Tsitlik, Halperin, Rogers, Traystman], A701
- effects of ganglionic blockade and catecholamines on neurologic outcome in rats [Hoffman, Werner, Miletich, Albrecht, Schulte am Esch], A720
- effects of propofol on neurologic outcome from incomplete cerebral ischemia in rat [Kochs, Hoffman, Werner, Albrecht, Schulte am Esch], A719
- induced hypertension during restoration of flow after temporary middle cerebral artery occlusion in rat: effect on brain injury and edema [Patel, Drummond, Cole], A722
- ketamine does not reduce infarct volume in rats undergoing focal cerebral ischemia [Warner, Ridenour, Todd, Ramani, McAllister], A727
- L-644,711 decreases focal cerebral ischemic injury [Cole, Kohut, Kimelberg, Ghazal, Osborne], A733
- microdialysis measurements of arachidonic acid metabolites in rat Ca1 hippocampus during transient cerebral ischemia [Benveniste, Hüttemeier, Brothers, Su, Watkins], A715
- oligodendroglial cell death occurs in absence of calcium in de-energization model of periventricular leukomalacia and [Jurkowitz-Alexander, Horrocks, Simmons, Hohl, Altschuld, McDonald], A743
- polyethylene glycol conjugated superoxide dismutase improves recovery of hypercapnic reactivity following ischemia [Kirsch, Helfaer, Haun, Traystman], A631
- secondary hypotensive insults in rat forebrain ischemia model [Reasoner, Warner, Todd, Ramani, McAllister], A728
- transient hypothermic reperfusion improves recovery of cerebral electrical activity after normothermic cerebral ischemia [Baldwin, Kirsch, Hurn, Toung, Traystman], A557
- vigabatrin protects against, in rats [Garcia, Bunegin, Albin], A742
- intracerebroventricular potassium channel agonists do not decrease MAC in rats [Zucker, Calkins], A676
- intracranial pressure**
- cerebral blood flow velocity and response of, to sufentanil: a dose response study [Slee, Lam, Winn], A176
- cerebral perfusion pressure during orthotopic liver transplantation for liver acute failure [Albaladejo, Jugan, Daibes, Orloff, Ecoffey], A289
- circulatory response to cerebral compression after  $\alpha$ -adrenergic and vasopressin blockade in fetal sheep [Takahashi, Harris, Koehler, Jones Jr., Traystman], A944
- effect of desflurane on cerebrospinal fluid pressure in neurosurgical patients [Muzzi, Losasso, Dietz, Faust, Milde], A1215
- effect of MAST on, in children [Meyer, Jayais, Quenet, Barrier], A1100
- effect of nitrous oxide on, following cranial-dural closure [Hemstad, Domino, Lam, Laohaprasin, Slee, Grady, Winn], A177
- effects of alfentanil on, in children undergoing ventriculo-peritoneal shunt revision [Markovitz, Cohen, Duhaime, Sutton], A213
- effects of infrarenal aortic occlusion on CSF pressure [Bevacqua, Cleary], A771
- impact of propofol on intracranial dynamics in head trauma ICU patients [Weinstabl, Mayer, Plattner, Spiss, Hammerle], A1217
- impact on CSF pressure in brain tumor patients: isoflurane vs. N<sub>2</sub>O [Jung, Reinsel, Galicich, Bedford], A193
- interaction of nicardipine and hypocapnic alkalosis on cerebral vasomotricity and [Durand, Combes, Girardet], A196
- paraben preservatives do not cause increased, in cats [Pompy, Karlin, Capuano, Hartung, Cottrell], A1214
- response of canine cerebral circulation to hyperventilation during anesthesia with desflurane [Lutz, Milde, Milde], A1212
- macrophages**
- hematologic and morphologic alterations after protective deep hypothermic circulatory arrest of 1-2h in dogs [Radovsky, Tisherman, Safar, Sterz, Kuboyama], A275
- memory evanescence in mice exposed to halothane [Rosman, Quartermain, Turndorf], A745
- metabolism**
- 5 $\alpha$ -pregnane-3 $\alpha$ -OL-20-ONE identified as active molecular species of steroid anesthetic in brain [Krieger, Mok, Herschkowitz], A704
- ATP does not correlate with recovery after anoxia and thiopental in rat hippocampus [Kass, Cottrell, Chambers], A673
- brain bioenergetics during cardiopulmonary resuscitation [Eleff, Schleien, Koehler, Shaffner, Eberle, Tsitlik, Halperin, Rogers, Traystman], A701
- cardiopulmonary bypass and total circulatory arrest alteration of, in infants, children [Greeley, Kern, Ungerleider, Quill, Baldwin, Reves], A91
- cerebral blood flow and, are independent of pump flow rate during hypothermic cardiopulmonary bypass in children [Kern, Greeley, Ungerleider, Quill, Baldwin, Smith, Reves], A1107
- dose-related changes in CBF and CMRO<sub>2</sub> during propofol infusions in rabbits [Ramani, Todd, Warner], A703
- effect of halothane in low concentrations on cerebral blood flow and, in baboon [Brussel, Van Aken, Fitch], A178
- effect of insulin infusion on brain and blood glucose in hyperglycemic diabetic rats [Hofer, Lanier], A1272
- effect of isoflurane on guanine nucleotide inhibition of 5HT1A agonist binding in fischer 344 rat brain [Silverstein, Mahle, Iberti, Maayani], A736
- effects of halothane on phospholipid N-methylation in rat brain synaptosomes [Franks, Sastry, Kambam, Surber, England], A404

effects of hypoglycemia and hypocarbia on brain pH, ATP phosphocreatine, and blood flow by NMR spectroscopy [Derr, Sieber, Koehler, Traystman, Saudek], A702

effects of sufentanil on CBF, CMRO<sub>2</sub> and cerebral blood flow velocity in dogs [Werner, Hoffman, Miletich, Albrecht, Schulte am Esch], A513

enhanced expression of proto-oncogene C-FOS protein in rats given ketamine [Mueller, Gillam, Grimes, Breese], A724

general anesthetics and ethanol inhibit enzymatic activity of CNS-derived protein kinase C [Firestone, Gray, Firestone], A706

increased phospholipid N-methylation in rat brain myelin membranes during anesthesia with halothane [Franks, Sastry, Kambam, Surber, England], A405

multifocal cerebral blood flow and, after prolonged cardiac arrest in dogs: effect of mild hypothermia [Oku, Kuboyama, Safar, Johnson, Sterz, Obrist, Leonov, Tisherman], A302

oligodendroglial cell death occurs in absence of calcium in de-energization model of hypoxia and periventricular leukomalacia [Jurkowitz- Alexander, Horrocks, Simmons, Hohl, Altschuld, McDonald], A743

pattern of brain tissue concentrations of glutamine, aspartate, glycine and dopamine with varying durations of global cerebral ischemia in rabbit [Baker, Zornow, Scheller, Yaksh], A675

methyguanidine increases evoked release of acetylcholine from rat brain [Ohta, Nitta, Vizi, Nagashima, Foldes], A684

**oxygenation**

continuous noninvasive assessment of brain blood volume and, during cardiopulmonary bypass in children undergoing ASD closure [Steven, Kurth, Nicolson, Phoon, Chance], A457

evaluation of, during cardiopulmonary bypass and total circulatory arrest in children by near infrared spectroscopy [Bracey, Greeley, Greibel, Kern, Ungerleider, Reves, Piantadosi], A1109

initial clinical experience using in vivo optical spectroscopy to quantify brain oxygen saturation [Prough, Scuderi, Lewis, Stump, Goetting], A424

**oxygen consumption**

cardiopulmonary bypass and total circulatory arrest alters cerebral metabolism in infants, children [Greeley, Kern, Ungerleider, Quill, Baldwin, Reves], A91

cerebral blood flow and metabolism are independent of pump flow rate during hypothermic cardiopulmonary bypass in children [Kern, Greeley, Ungerleider, Quill, Baldwin, Smith, Reves], A1107

dose-related changes in CBF and CMRO<sub>2</sub> during propofol infusions in rabbits [Ramani, Todd, Warner], A703

effects of sufentanil on CBF, CMRO<sub>2</sub> and cerebral blood flow velocity in dogs [Werner, Hoffman, Miletich, Albrecht, Schulte am Esch], A513

interaction of fentanyl and nitrous oxide on cerebral and peripheral hemodynamics in newborn lambs [Yaster, Koehler, Traystman], A1117

pH management during hypothermic cardiopulmonary bypass does not influence [Murkin, Sharpe, Farrar], A117

response of canine cerebral circulation to hyperventilation during anesthesia with desflurane [Lutz, Milde, Milde], A1212

persistence of neuropsychological deficits following CABG [Stump, Newman, Coke, Phipps, Miller], A113

**platelets**

hematologic and morphologic alterations after protective deep hypothermic circulatory arrest of 1-2h in dogs [Radovsky, Tisherman, Safar, Sterz, Kuboyama], A275

postoperative neurological function in patients undergoing elective

coronary artery surgery: a prospective study [Murkin, Buchan, Sim, Martzke, Sharma], A161

rCBF and formation of brain edema in presence of a focal lesion: influence of isoflurane, fentanyl or thiopental [Murr, Schurer, Berger, Baethmann, Enzenbach, Peter], A566

**Bronchopleural fistula. See under Complications**

**Bronchoscopy. See under Anesthetic techniques**

**Bronchus. See under Lungs**

**Bunazosin. See under Sympathetic nervous system**

**Bupivacaine. See under Anesthetics, local; Toxicity**

**Burns. See under Complications**

**Butorphanol. See under Analgesics**

**BW954U. See under Neuromuscular relaxants**

## C

**Calcium. See under Ions**

**Cannulation. See under Arteries; Veins**

**Carbon dioxide. See also Monitoring**

**absorption**

CO<sub>2</sub> diffusion: comparison between intra or extraperitoneal injection [Mullet, Miellet, Viale, Ruynat, Annat, Dargent, Motin], A1149

**elimination**

tracheal O<sub>2</sub> at low flow (<8 ml/kg/min) oxygenates and removes CO<sub>2</sub> during apnea [Mackenzie, Barnas, Nesbitt], A269

**hypercarbia**

contribution of carotid chemoreceptors to changes in mesenteric vein diameter during acute hypercapnia in rabbit [Tominaga, Stekiel, McCallum, Bosnjak, Kampine], A632

effect of, on regional myocardial tissue oxygen tension in dogs with coronary stenosis [Okazaki, Hashimoto, Okutsu, Okumura, Fukunaga], A549

halothane attenuates mesenteric venoconstriction in response to graded hypercapnea [Stekiel, Tominaga, Bosnjak, Kampine], A578

hypocapnia and hypercapnia cause heterogenous changes in regional organ blood flow [Czinn, Salem, Crystal], A661

polyethylene glycol conjugated superoxide dismutase (PEG-SOD) improves recovery of hypercapnic reactivity (HYPR) following ischemia [Kirsch, Helfaer, Haun, Traystman], A631

**hypocarbia**

effect of, on regional myocardial tissue oxygen tension in dogs with coronary stenosis [Okazaki, Hashimoto, Okutsu, Okumura, Fukunaga], A549

effects of hypocapnic alkalosis on vasodilating action of nicardipine [Combes, Fauvage, Hubert, Guerret, Girardet], A145

effects of hypoglycemia and, on brain pH, ATP phosphocreatine, and blood flow by NMR spectroscopy [Derr, Sieber, Koehler, Traystman, Saudek], A702

hypocapnia and hypercapnia cause heterogenous changes in regional organ blood flow [Czinn, Salem, Crystal], A661

interaction of nicardipine and hypocapnic alkalosis on cerebral vasomotricity and intracranial pressure [Durand, Combes, Girardet], A196

response of canine cerebral circulation to hyperventilation during anesthesia with desflurane [Lutz, Milde, Milde], A1212

**measurement**

end-expired, following ingestion of "cola": tracheal and esophageal [Sum Ping, Mehta, Symreng], A1040

end-tidal, clinical utility of colorimetric detector in emergency intubation [Varon, Morrino, Civetta], A413

end-tidal, colorimetric monitoring to prognosticate immediate

- resuscitation from cardiac arrest [Varon, Morrino, Civetta], A412
- end-tidal, prototype expert system aids in differential diagnosis of acute decrease in [van der Aa, Pan, Gomez, van Oostrom], A1024
- exhaled, humidity affecting a chemically based monitor of [Ponitz, Gravenstein, Banner], A515
- inspired, severity of expiratory valve incompetence alters capnogram and [Good, Gravenstein, Lampotang, Blackshear], A514
- monitoring**
- carbon dioxide rebreathing during pulmonary artery catheter insertion [Bowe, Muth, Payne, Hyman, Klein], A1080
- clinical utility of colorimetric end-tidal carbon dioxide detector in emergency intubation [Varon, Morrino, Civetta], A413
- detection of anesthesia machine leaks with nitrogen, end-tidal CO<sub>2</sub>, PACO<sub>2</sub> and pulse oximetry during spontaneous ventilation in anesthetized dogs [Jameson, Popic], A1031
- end-expired CO<sub>2</sub> following ingestion of "cola": tracheal and esophageal [Sum Ping, Mehta, Symreng], A1040
- end tidal CO<sub>2</sub> monitoring during prehospital cardiopulmonary resuscitation [Rozenberg, Carli, Bousquet, Lamour, Barrier], A531
- end-tidal PCO<sub>2</sub> reflects changes of cardiac output [Shibutani, Komatsu, Kashiwagi, Bairamian, Kumar], A506
- gas man simulation of overpressure is verified by correct alveolar plateau [Philip], A1025
- humidity affecting a chemically based monitor of exhaled carbon dioxide [Ponitz, Gravenstein, Banner], A515
- reliability of FEF end-tidal CO<sub>2</sub> detector during CPR [Mehta, Symreng, Sum Ping], A473
- sensitivity of FEF end tidal CO<sub>2</sub> detector [Symreng, Sum-Ping, Mehta], A479
- severity of expiratory valve incompetence alters minimum inspired carbon dioxide and capnogram [Good, Gravenstein, Lampotang, Blackshear], A514
- single-blind study of combined pulse oximetry and capnography in children [Rolf, Cote, Liu, Gousouzian, Ryan], A1125
- use of colorimetric end-tidal carbon dioxide monitoring to prognosticate immediate resuscitation from cardiac arrest [Varon, Morrino, Civetta], A412
- response**
- cerebral blood flow reactivity to CO<sub>2</sub> during halothane or isoflurane anesthesia for carotid endarterectomy [Young, Prohovnik, Correll, Ostapovich, Ornstein, Quest], A204
- transport**
- CO<sub>2</sub> diffusion: comparison between intra or extraperitoneal injection [Mullet, Mielliet, Viale, Ruynat, Annat, Dargent, Motin], A1149
- ventilatory response**
- antinociception and CO<sub>2</sub>, following spinal and systemic dexmedetomidine in dogs [Sabbe, Penning, Yaksh], A1269
- comparison of CO<sub>2</sub> reactivity for middle cerebral artery velocities and 133-XE cerebral blood flow values during anesthesia [Young, Massaro, Ornstein, Prohovnik, Mohr], A205
- does isoflurane affect cerebrovascular response to carbon dioxide in anesthetized children? [Leon, Bissonnette, Lerman], A1221
- Carbon dioxide response. See under Ventilation**
- Carbon monoxide. See under Gases, nonanesthetic**
- Cardiac arrest. See under Complications**
- Cardiac output. See under Heart; Measurement techniques**
- Cardiac toxicity. See under Toxicity**
- Cardiovascular anesthesia. See under Anesthesia**
- Cardiovascular surgery. See under Surgery**
- Carotid artery. See under Arteries**
- Carotid endarterectomy. See under Surgery**
- Catheters. See under Equipment**
- Caudal block. See under Anesthetic techniques**
- Celiac plexus block. See under Anesthetic techniques**
- Cells**
- effects of catecholamines and blood transfusion on cellular immune function following trauma [Eustache, Lees, Petit, Godier, Oksenhendler, Winckler], A226
- Cerebral cortex. See under Brain**
- Cervical plexus block. See under Anesthetic techniques**
- Chloride. See under Ions**
- Chloroform. See under Anesthetics, volatile**
- Chloroprocaine. See under Anesthetics, local**
- Chronic pain. See under Pain**
- Cimetidine. See under Histamine**
- Clonidine. See under Sympathetic nervous system**
- Closed circle anesthesia. See under Anesthetic techniques**
- Coagulation. See under Blood**
- Cocaine. See under Anesthetics, local; Toxicity**
- Complications. See also Intubation, tracheal; Transfusion**
- amnesia and unconsciousness with fentanyl-induced rigidity in human volunteers: incidence, duration and associated plasma levels [Streisand, Ashburn, Bailey, Tarver, Le Maire], A368
- antagonism of postoperative respiratory depression caused by large doses of morphine [Radvanyi, Marin, Bikhazi, Foldes], A1173
- arrest, cardiac**
- bupivacaine-induced, epinephrine reversal of, in rats [Wu, Bircher, Safar], A303
- colorimetric end-tidal carbon dioxide monitoring to prognosticate immediate resuscitation from [Varon, Morrino, Civetta], A412
- incidence of, decreasing [Keenan, Boyan], A1022
- incidence of, in infants: effect of pediatric anesthesiologists [Keenan, Shapiro, Dawson], A1045
- oxygen supply dependency is not a clinically relevant finding in adequately resuscitated critically ill patients [Hannemann, Korell, Kuss, Reinhart], A242
- prolonged, multifocal cerebral blood flow and global metabolism following, in dogs: effect of mild hypothermia [Oku, Kuboyama, Safar, Johnson, Sterz, Obrist, Leonov, Tisherman], A302
- sodium bicarbonate improves outcome after ten minutes of, in dogs [Bircher], A276
- asphyxia**
- association of airway obstruction, hypoxemia, and postoperative apnea in preterm infants [Kurth, LeBard, Downes], A1131
- aspiration**
- does 360 ml of apple juice before elective surgery increase risk factors? [Vincent, Spaid, McNeil, MacMahon, Maxwell], A1250
- efficacy of different dosages of oral famotidine in comparison to ranitidine for prophylaxis [Talke, Solanki], A1075
- pneumonia, sucralfate does not reduce risk of [Toung, Aizawa, Grayson, Reilly, Dorman, Traystman], A274
- asthma**
- molecular mechanisms of  $\beta$ -adrenergic hyporesponsiveness in BG model of [Emala, Hirshman, Levine], A1196
- back pain following chloroprocaine epidural anesthesia [Hynson, Sessler, Glosten, McGuire], A48
- bronchopleural fistula**
- continuous flow apneic ventilation with helium-oxygen in dogs with [Garcia, Bunegin, Smith], A1186

## burns

- pulmonary capillary pressure changes following smoke inhalation in sheep [Isago, Traber, Herndon, Traber], A1234
- succinylcholine actions in plasma from patients with and without [Storella, Hill], A870
- circulatory, neurologic, and blood gas changes during total knee replacement: role of intramedullary alignment rod [Fahmy, Chandler, Daylchuk, Sunder, Matta], A1258
- clinical use of PA watch catheter [Robertie, Johnston, Williamson, Wallenhaupt, Ganz], A85
- comparison of pulmonary function testing, arterial blood gas analysis and Roizen classification in prediction of, in head and neck surgical patients [Reilley, Rao, Schuller], A286
- correlation between two physical status measures and ASA physical status score [Coalson, Roizen, Apfelbaum, Rupani, Roberts, Finn, Schreider, Lichtor, Uitvlugt, Thisted], A1253
- determinants of outcome following pneumonectomy [Alfille, Hurford], A1072
- does use of methymethacrylate cement induce hemodynamic or pulmonary instability? [Huffnagle, Torjman, Marr, Fenlin, Seltzer], A1021

## eclampsia

- endothelin levels in patients with preeclampsia [Danner, Thorp, Geer, Goetz], A947
- is pregnancy-induced hypertension a risk factor for difficult intubation? [Dupont, Jamza, Jullien, Narchi], A985
- maternal stress response during cesarean delivery in severe preeclampsia [Ramanathan, Sibai], A988
- effect of cerebral perfusion pressure during cardiopulmonary bypass on neuropsychiatric outcome following coronary artery bypass grafting [Stanley, Smith, White, Morrison, Blumenthal, Burkner, Schniebolck, Newman, Croughwell, Reeves], A93
- effect of outcome on physician judgments of appropriateness of care [Caplan, Posner, Cheney], A1247
- effect of pulse oximetry, age and ASA physical status on severity of anesthesia complications: an outcome analysis [Cullen, Nemeskal, Cooper, Zaslavsky, Dwyer], A1249

## embolism

- air aspiration characteristics of a silicon multiorificed catheter [Bunegin, Albin, Sadzius], A459
- incidence of, in radical neck dissection surgery [Rice, Gonzalez, Labate, Cwalina, Tome], A1082
- intracranial, is detected by transcranial Doppler during cardiopulmonary bypass procedures [Albin, Hantler, Bunegin, Grover, Cohen, Mitzel], A458
- locations of retained intracardiac air in coronary artery bypass grafting using transesophageal echocardiography [Orihashi, Hong, Keehn, Goldiner, Oka], A430
- prevention of, in pediatric neurosurgical procedure by using MAST [Meyer, Jayais, Quenet, Barrier], A1101
- respiratory complications of, during neurosurgery [Toth, Mendelsohn, Tausk, Marlar, Shamsi], A198

## endotracheal

- inadvertent endobronchial intubation in pediatric anesthesia: a prospective study [Rolf, Cote], A461
- epidural catheter aspirate [Waters, Chuba, Ramanathan, Turndorf], A959
- gross neurologic outcome in CABG patients managed with single or multiple aortic crossclamp: preliminary retrospective analysis [Scheller, Glina, Masse], A78

## headache

- maternal obesity and, following unexpected dural puncture [Heyman, Salem, Joseph], A971
- post-dural, correlation of transcranial Doppler and cerebral blood

flow in patients with [Stump, Bowton, Prough, Newman, Tegeler], A480

post-dural, efficacy of intravenous caffeine for [Abboud, Zhu, Reyes, Steffens, Afrasiabi, Gendein], A936

post-dural, incidence of, after subarachnoid block for postpartum tubal ligation comparison of 26 vs. 30 g needles [Herman, Knape, Husain, Karuparthy, Downing], A972

post-dural, intrathecal morphine and [Carney, Weiss, Norris, Leighton], A949

spinal, effect of intrathecal morphine on incidence of spinal [Abboud, Reyes, Zhu, Steffens, Afrasiabi, Miller, Afrasiabi, Sherman], A937

hemodynamic changes in patients undergoing total hip arthroplasty: cemented vs. noncemented [Ereth, Lennon, Rose, Lewallen], A110

how frequently do asymptomatic patients benefit from pursuit of abnormalities in their preoperative test results? [Apfelbaum, Roizen, Robinson, Murray, Grogono, Duke, Kim, Roberts, Rupani, Texidor, Gronert, White, Poler, Coalson, Youngberg, Dionne, Stocking, Thisted], A1254

## hypertension

pregnancy-induced, and bleeding in parturients under epidural anesthesia [Troche, Hamza, Narchi, Lecoq], A998

sternotomy-induced, hemodynamic effects of nicardipine used for treatment of [Marty, Pansard, Lancon], A1200

## hypotension

acute, immediately following rapid hypertonic saline infusion in anesthetized dogs [Kien, Kramer, White], A571

flushing, bronchospasm and, in myelodysplasia patients [Holzman, Sethna, Sockin], A1123

predictive signs of, after spinal anesthesia for cesarean section [Casteil, Blanot, Lienhart], A991

hypoventilation and mixed etiology of postoperative hypoxemia [Russell, Graybeal], A1057

improved neurologic outcome using naloxone and spinal fluid drainage in surgery of thoracoabdominal aorta [Wynn, Archer], A64

incidence of bloody taps during pediatric caudal blockade [van Obbergh, Veyckemans, Gouverneur], A1236

incidence of failed intubation in obstetrics: is there an irreducible minimum? [Glassenberg Vaisrub, Albright], A1062

## infections

bacteriological comparison of continuous epidural postoperative analgesia with and without use of disposable millipore filters [Bedder, Montreuil, Mulhall, Cotie, Richardson], A840

bacteriologic assessment of lower respiratory tract using three sampling methods in ventilated patients [Papazian, Derbel, De Francia, Charrel, Gouin], A251

blood contamination and intravenous injection ports [Sprague, Schmidt, Culling, Menk], A1009

candida, in surgical patients staying in ICU: a prospective study [Gouin, Eon, Blancard, Saux, Martin], A220

CNS, is postoperative intrathecal catheter use associated with? [Bevacqua, Slucky, Nemec], A791

control, have anesthesiologists implemented precautions? [Rosenberg, Bernstein, Ramanathan], A1015

control, quality assurance in [Greene], A1061

herpes simplex virus labialis, recurrent, incidence of, after cesarean section [Weiss, Carney, Norris, Leighton, Torjman], A951

nosocomial bronchopulmonary, incidence of, in ventilated patients using standard means of prevention [Auffray, Papazian, Martin, Eon, Gouin], A221

risk of thiopental contamination [Wong, Warriner, McCormack, Clarke], A1030

- upper respiratory, incidence of hypoxemic events during anesthesia in children with [Rolf, Cote], A1124
- intensive care unit outcome of patients receiving chronic hemodialysis [Corwin, Gettinger, Brochu], A294
- intraoperative, rates of; influence of ASA physical status, age, sex, race and body mass index [Hudson, Gennings, Kane, Tyler, Keenan], A1044
- intrathecal papaverine administration decreases risk for spinal cord ischemia in relation with thoracic aortic aneurysm surgery [Godet, Bertrand, Kieffer, Chiras, Coriat, Daas, Viars], A185
- intubation**
- inadvertent, in pediatric anesthesia: a prospective study [Rolf, Cote], A461
- is pregnancy-induced hypertension a risk factor for? [Dupont, Jamza, Jullien, Narchi], A985
- lidocaine 45mg in epidural test dose is not a marker of intravascular injection in parturients [Lingaraju, Colonna-Romano, Mazala], A976
- metoclopramide may cause dysphoria [Horton, Chadwick], A38
- myasthenia gravis**
- epidural morphine decreases pain following trans-sternal thyroectomy in patients with [Kirsch, Diringier, Borel, Hanley, Merritt, Bulkley], A272
- sensitivity to atracurium in patients with, during true remission [Abel, Eisenkraft], A892
- obesity**
- acetyl-salicylic acid reverses nitroglycerin-induced fall in  $\text{PaO}_2$  in [In-nami, Takasaki, Kawaguchi, Okada], A1179
- anesthesia outcome in [Hood, Dewan, Kashtan], A952
- in parturient patients [El-Naggar, Mehta, Kartha], A1000
- maternal, and headache following unexpected dural puncture [Heyman, Salem, Joseph], A971
- perioperative pulmonary complications in; no major effect on outcome [Layne, Warner, Warner], A1073
- perioperative pulmonary aspiration: incidence and risk factors [Weber, Warner, Warner], A1017
- persistence of neuropsychological deficits following CABG [Stump, Newman, Coke, Phipps, Miller], A113
- porphyria**
- do exogenous porphyrins affect anesthetic management? [Manecke, Laster, Fairchild, Poppers], A376
- predictors of post-extubation stridor in pediatric trauma patients [Bishop, Kemper, Benson], A229
- prospective analysis of reported significant observations during anesthesia [Chopra, Bovill, Spierdijk, Koornneef], A1248
- pruritus control following epidural opiates through continuous infusion plus self-administration of mu antagonists vs. mixed agonist-antagonists in post-cesarean section population [Kendrick, Birch, Woods], A941
- recovery room morbidity and mortality associated with renal extracorporeal shock wave lithotripsy (ESWL) [Kovac, Mangold], A1060
- reduction of significant cardiac morbidity by epidural morphine in non-cardiac surgery [Beattie, Buckley, Forrest], A71
- risk factors associated with postpartum backache in obstetric patients [Lecoq, Hamza, Narchi, Jullien, Attane], A966
- risk factors for multisystem organ failure after cardiac surgery [Tuman, McCarthy, Corey, Ivankovich], A314
- risk factors for postpartum backache associated with epidural anesthesia [Benlabeled, Hamza, Jullien, Troche, Lecoq], A996
- shivering**
- in cardiac patient: evaluation of Bair Hugger warming system [Mort, Rintel, Altman], A239
- cold-induced, effect of meperidine and naloxone on [Cooper, McMurray, Pavlin, Schoene, Freund], A230
- following cardiopulmonary bypass, vecuronium infusion vs. meperidine in treatment of, [Fassero, Berend, Sladen], A1229
- hypothermia triggers spontaneous post-anesthetic tremor [Sessler, Rubinstein], A173
- mass spectrometric measurement of oxygen uptake in postoperative period of major abdominal surgery: effect of clonidine [Quintin, Viale, Annat, Butin, Hoen, Cottet-Eymard, Motin], A252
- postanesthesia, incidence and treatment of [Heffline, Dubin, Brown, Jense], A1256
- postanesthesia, localized radiant heat restores oxygen consumption to normal [Harkey, Gulden, Lipton, Giesecke], A535
- postanesthesia, meperidine vs. methylphenidate for treatment of [Boylan, Gallagher, Kelly, Stritch, MacEvilly], A1067
- post-epidural, clonidine suppression of; double blind study [Tryba, Zenz, Pern], A788
- postoperative, IV clonidine fails to inhibit [Bernard, Hommerial, Passuti, Pinaud], A240
- slow injection does not prevent midazolam-induced ventilatory depression [Alexander, Teller, Gross], A1147
- slow injection of midazolam does not reduce risk of hypoxia [Teller, Alexander, Gross], A1251
- subarachnoid EDTA induces hindlimb myoclonus in rats [Wang, Li, Hiller, Simon, Dubzilovich, Hillman, Turndorf], A1259
- thoracic epidural anesthesia is not preferable to general anesthesia in high risk surgical patients [Baron, Bertrand, Barre, Godet, Coriat, Viars], A807
- thrombosis**
- deep vein, does postoperative epidural analgesia reduce? [Sharrock, Hargett, Urquhart, Insall, Ranawat], A69
- risk of long-term radial artery cannulation: evaluation by multivariate discriminant analysis [Martin, Lambert, Sureau, Boneru, Gouin], A1028
- venous, after central venous catheterization via axillary vein [Martin, Auffray, El sayed Hassan, Saux, Gouin], A1006
- total parenteral nutrition increases mortality following methotrexate-induced endogenous sepsis [Zaloga, Prielipp, Ward], A1232
- trauma**
- multiple, glycerol as fuel substrate in [Singer, Bursztein, Elwyn, Kvetan, Askanazi], A261
- safety of airway management in [Hanson, Rotundo, McGonigal, Kauder, Schwab], A287
- in vitro evaluation of relative perforation potentials of six epidural catheters [Blackshear, Gravenstein, Wissler], A1046
- Computers. See also Equipment**
- adaptable model of economic effects of alternative anesthetic regimens in outpatient surgery [Marais, Maher, Wetchler, Sung], A54
- analysis and frequency of artifacts generated by anesthesia information management systems [Edsall], A481
- clinical evaluation of "private eye": a "heads-up" display of anesthesia data [Block Jr., Swan, Yablok, McDonald], A534
- comparison of manual and automatic charting with a commercially-available automatic anesthesia recordkeeper [Block, Jr., Minic, McDonald], A521
- comparison of vigilance using automated vs. hand written records [Yablok], A416
- documentation time requirement computerized information management systems vs. handwritten records [Edsall], A439
- effect of intravenous epinephrine on heart rate as monitored with computerized tachometer [Huang], A762
- evaluation of a breathing circuit alarm system based on neural networks [Orr, Westenskow], A445
- expert system to teach how to troubleshoot common problems of



automated anesthesia recordkeeper [Block Jr., McDonald], A1087  
gas man simulation of overpressure is verified by correct alveolar plateaus [Philip], A1025  
incidence of vital sign artifact in automated anesthesia records [Stanley, III, Smith, White, Melisko, Hu], A483  
management of quality assessment monitoring data [Scamman, Todd, Jadryev], A1039  
pharmacokinetic and pharmacodynamic modelling for anesthesia simulation [Beinlich, Gaba, Williams, Ebling], A1041  
prototype expert system aids in differential diagnosis of acute decrease in end-tidal CO<sub>2</sub> [van der Aa, Pan, Gomez, van Oostrom], A1024  
real time simulation of cardiac electrophysiology [Gaba, Beinlich], A1069  
resident evaluation [Ramanathan, Turndorf], A1081  
**Continuous positive pressure breathing.** *See under Ventilation*  
**Contractility.** *See under Heart; Muscle, skeletal*  
**Convulsions.** *See under Brain*  
**Cooling.** *See under Temperature*  
**Cornea.** *See under Eyes*  
**Coronary occlusion.** *See under Heart*  
**Cortex.** *See under Brain*  
**Corticosteroids.** *See under Hormones*  
**Cyclosporine.** *See under Pharmacology*

## D

**Deadspace.** *See under Lungs*  
**Denervation.** *See under Muscle, skeletal*  
**Depth anesthesia.** *See under Anesthesia*  
**3-Desacetylvecuronium.** *See under Neuromuscular relaxants*  
**Desbutylbupivacaine.** *See under Toxicity*  
**Desflurane.** *See under Anesthetics, volatile*  
**Desmopressin.** *See under Blood; Pharmacology*  
**Dexmedetomidine.** *See under Sympathetic nervous system*  
**Diabetes.** *See under Metabolism*  
**Diaphragm.** *See under Muscle, skeletal*  
**Diazepam.** *See under Anesthetics, intravenous; Hypnotics*  
**Diethyl ether.** *See under Anesthetics, volatile*  
**Diltiazem.** *See under Heart; Pharmacology*  
**Dobutamine.** *See under Heart; Pharmacology; Sympathetic nervous system*  
**Dopamine.** *See under Sympathetic nervous system*  
**Dopexamine.** *See under Sympathetic nervous system*  
**Doppler equipment.** *See under Equipment*  
**Doppler measurement.** *See under Measurement techniques*  
**Dorsal horn ganglia.** *See under Spinal cord*  
**Doxorubicin.** *See under Pharmacology*  
**Dronabinol.** *See under Pharmacology*  
**Drug interactions.** *See Interactions (Drug)*  
**d-tubocurarine.** *See under Neuromuscular relaxants*  
**Dystrophy.** *See under Sympathetic nervous system*

## E

**Echocardiography.** *See under Heart*  
**Eclampsia.** *See under Complications*  
**ED50.** *See under Potency, anesthetic*  
**Edema.** *See under Lungs*  
**Edrophonium.** *See under Antagonists, neuromuscular relaxants*  
**Education**  
assessment of medical student confidence in recognizing position of endotracheal tube position after intubation [O'Flaherty, Adams], A1032

faculty advisors: mentors: role models? employment counselors? [Rosenberg, Horrow, Polonsky], A1036  
gas man simulation of overpressure is verified by correct alveolar plateaus [Philip], A1025  
malignant hyperthermia simulator [Schwid, O'Donnell], A1058  
**medical students**  
current perceptions of, on anesthesiology as career [Schulte, Block Jr., McDonald], A1048  
pre- and post-clerkship tests are good indicators of [Pandit, Levy, Sanders], A1071  
pharmacokinetic and pharmacodynamic modelling for anesthesia simulation [Beinlich, Gaba, Williams, Ebling], A1041  
plethysmographic pulse oximetry: a teaching tool in lumbar sympathetic blockade [Ngeow, Shay, Neudachin], A1086  
real time simulation of cardiac electrophysiology [Gaba, Beinlich], A1069

## residents

clinical experience influences final in-training examination results [Ronai, Molloy Jr.], A1047  
computerized evaluation of [Ramanathan, Turndorf], A1081  
controlled study on cognitive and performance impacts of sleep deprivation in anaesthetic registrars [Zelcer, Manton, Paull], A1065  
correlation between peer and, evaluation of anesthesia lectures [Sivarajan], A1042  
nongognitive variables: primary determinants of clinical performance and precursors of critical incidents in five anesthesiology training programs [Rhoton, Barnes, Flashbur, Ronai, Springman], A1059  
selection of, is not influenced by timing of interview [Pearson, From, Moyers, Kreiter, Albanese, Gomez, Hindman, Murray, Tinker], A1078  
start date of anesthesiology training: effect on academic and clinical performance [Furgerson, Rhoton], A1056  
structure of CA-3 year: a look at current status and recent trends [Meakem], A1076  
role of experience in response to simulated critical incidents [DeAnda, Gaba, Lee], A1085  
stress in attending anesthesiologist [Bitetti, Hartwell, Chin, Lichtmann, Naulty], A1004

**Electrical measurements.** *See under Measurement techniques*  
**Electrocardiography.** *See under Heart; Measurement techniques; Monitoring*

**Electroconvulsive therapy.** *See under Anesthesia*

**Electroencephalography.** *See under Brain*

**Embolism.** *See also Complications*

## air

comparison of central venous catheters for aspiration of [Hanna, Gravenstein, Pashayan], A504  
incidence of, in radical neck dissection surgery [Rice, Gonzalez, Labate, Cwalina, Tome], A1082

**Endobronchial insufflation.** *See under Anesthetic techniques*

**Endorphins.** *See under Polypeptides*

**Endothelin.** *See under Polypeptides*

**Endotracheal intubation.** *See under Complications; see also Intubation, tracheal*

**Endotracheal tubes.** *See under Equipment*

**Enflurane.** *See under Anesthetics, volatile*

**Enkephalins.** *See under Polypeptides*

**Enoximone.** *See under Pharmacology*

## Enzymes

### pseudocholinesterase

inhibition of activity, protects from cocaine-induced cardiorespiratory toxicity in rats [Kambam, Naukam, Parris, Franks, Wright], A581

**superoxide dismutase**

polyethylene glycol conjugated, improves recovery of hypercapnic reactivity following ischemia [Kirsch, Helfaer, Haun, Traystman], A631

**Epidural anesthesia. See under Anesthetic techniques****Epidural equipment. See under Equipment****Epinephrine. See under Heart; Sympathetic nervous system****Equipment****adapters**

evaluation of a simple technique to prevent disconnections of 15 mm tracheal tube adapter [Sosis, Dillon, Harwood], A537  
metered dose inhaler actuator-adapters: comparison of particle size and drug delivery through an endotracheal tube [Bishop, Larson, Buschman], A1187

**analyzers**

evaluation of Poet II (Criticare) multigas infrared analyzer [Munshi, Brennan], A478

**anesthesia circuits**

breathing circuit related respiratory effort in infants recovering from respiratory failure [Räsänen, Leijala], A225  
evaluation of a breathing circuit alarm system based on neural networks [Orr, Westenskow], A445

**anesthesia machines**

anesthetists cannot identify audible alarms [Loeb, Jones, Behrman, Leonard], A539  
detection of leaks during controlled ventilation in anesthetized dogs [Jameson, Popic], A1064  
detection of leaks with nitrogen, end-tidal CO<sub>2</sub>, PACO<sub>2</sub> and pulse oximetry during spontaneous ventilation in anesthetized dogs [Jameson, Popic], A1031  
effect of fresh gas flow on inspired and expired concentrations of anesthetics in man [Deriaz, Baras, Lienhart], A452  
new, development of a monitoring-for-change algorithm for [Philip, Scott, Topulos, Calalang, Raemer], A466

**catheters**

A22G compatible continuous spinal catheter, evaluation of [Krejcie, Leifheit, Ovassapian], A856  
blood contamination and intravenous injection ports [Sprague, Schmidt, Culling, Menk], A1009  
central venous, comparison of, for aspiration of venous air embolism [Hanna, Gravenstein, Pashayan], A504  
epidural, comparison of tensile strengths of seven types of [Blackshear, Gravenstein, Wissler, Bjoraker], A961  
epidural, in vitro evaluation of relative perforation potentials of [Blackshear, Gravenstein, Wissler], A1046  
metered dose inhaler delivery dose in tracheal tubes and [Taylor, Lerman], A1153  
mixed-venous oxygen saturation, clinical evaluation of [Scuderi, Bowton, Meredith, Harris, Brockschmidt], A484  
multi-orificed CVP, pressure waveform localization of [Culling, Mongan, Peterson], A208  
pacing pulmonary artery, indications for [Risk, D'Ambra, Koski, Brandon, Philbin], A160  
PA introducers: do component parts affect flow rate? [Hyman, Smith, England, Naukam, Berman], A265  
right ventricular ejection fraction, evaluation of, using a right ventricular pulsatile flow bench model [Mayer, Gelineau, Bunegin, Jones, Hantler], A519  
simple extension improves delivery efficiency of metered dose inhalers: a quantitative evaluation [Peterfreund], A486  
spinal microcatheters, tensile strength of [Wissler, Blackshear, Bjoraker, Gravenstein], A505

**computers**

an alternative parallel-computing approach to intelligent hemodynamic monitoring [Cohn, Rosenbaum, Miller], A541

automated recording of pulse oximetry [Pan, Gravenstein], A503  
development of an automated laser interrupter for helium protocol [Gibby, Hathiram], A527

**Doppler**

reliability of new generation transesophageal device for cardiac output monitoring [Schmid, Spahn, Tornic], A415  
early clinical trials of intravenous oxygenator in patients with adult respiratory distress syndrome [High, Snider, Campbell, Russell, Stene, Thieme], A270

**endotracheal**

evaluation of a simple technique to prevent disconnections of 15 mm adapter [Sosis, Dillon, Harwood], A537  
intraluminal gauge pressure affects ignition by CO<sub>2</sub> laser [Davis, Pashayan, Cassisi, Roan, Gravenstein], A1070  
metered dose inhaler actuator-adapters: comparison of particle size and drug delivery through [Bishop, Larson, Buschman], A1187  
metered dose inhaler delivery dose in catheters and [Taylor, Lerman], A1153  
phonocardiographic monitoring using a special tube [Doyle, Teves], A497

**epidural**

comparison of tensile strengths of seven types of catheters [Blackshear, Gravenstein, Wissler, Bjoraker], A961  
in vitro evaluation of relative perforation potentials of six catheters [Blackshear, Gravenstein, Wissler], A1046

**filters**

assessing prostacyclin efficacy in continuous hemofiltration using a new hemofilter permeability index [Journiois, Safran, Mauriat, Chanu, Castelain], A271

**humidifiers**

circuit, impact of lung compliance and, tidal volume measurement errors [Feldman, Muller], A469  
humidity affecting a chemically based monitor of exhaled carbon dioxide [Ponitz, Gravenstein, Banner], A515

**infusion systems**

build yourself a low cost pneumatic pressure bag inflating device [Mazala], A518  
new, flow rates and temperatures of resuscitation fluids by [Kavee, Boolbol, Capan], A516

**intravenous**

blood contamination and injection ports [Sprague, Schmidt, Culling, Menk], A1009  
comparison of central venous catheters for aspiration of venous air embolism [Hanna, Gravenstein, Pashayan], A504  
pressure waveform localization of multi-orificed CVP catheters [Culling, Mongan, Peterson], A208

**lasers**

CO<sub>2</sub>, intraluminal gauge pressure affects tracheal tube ignition by [Davis, Pashayan, Cassisi, Roan, Gravenstein], A1070  
KTP/532, effect of helium on endotracheal tube flammability during use of [AlHaddad, Brenner], A491

**nuclear magnetic resonance**

improved MR imaging by ECT-triggered high-frequency ventilation [Groh, Welte, Seiderer, Staebler, Peter], A477  
Ohmeda (R) fluotec-4 vaporizer output near MRI magnet [Rao, Krishna, Baldwin, Robbeloth], A476

**pacemakers**

indications for use of pacing pulmonary artery catheters [Risk, D'Ambra, Koski, Brandon, Philbin], A160  
pacing artifacts create "pseudoischemia" in processed EEG in patients during cardiopulmonary bypass [Roy, Prough, Phipps], A526

- pulmonary arterial**  
 clinical evaluation of three mixed-venous oxygen saturation catheters [Scuderi, Bowton, Meredith, Harris, Brockschmidt], A484  
 evaluation of right ventricular ejection fraction catheters using a right ventricular pulsatile flow bench model [Mayer, Gelineau, Bunegin, Jones, Hantler], A519  
 indications for use of pacing catheters [Risk, D'Ambra, Koski, Brandon, Philbin], A160
- pulse monitors**  
 PEEP valves may doom pressure control inverse-ratio ventilation [East, Böhm, Peng, Hoffmann, Morris], A308  
 pulseless oximetry: next generation? [Volgyesi, Burrows, Bissonnette], A460  
 respiratory effects of medical antishock trousers [Pansard, Lazard, Riou, Viars], A434  
 response time with smart alarms [Orr, Simon, Ing, Bender, Westenskow], A447  
 role of equipment failure and misuse in anesthetic-related malpractice claims [Vistica, Posner, Caplan, Cheney], A1008  
 shivering in cardiac patient: evaluation of Bair Hugger warming system [Mort, Rintel, Altman], A239  
 smart anesthesia monitoring system [Pan, van der Aa, Gomez, van Oostrom, Beneken, Gravenstein], A450
- tubes**  
 endotracheal, metered dose inhaler actuator-adapters: comparison of particle size and drug delivery through [Bishop, Larson, Buschman], A1187  
 endotracheal, phonocardiographic monitoring using [Doyle, Teves], A497  
 tracheal, metered dose inhaler delivery dose in catheters and [Taylor, Lerman], A1153  
 tracheal, evaluation of a simple technique to prevent disconnections of 15 mm adapter [Sosis, Dillon, Harwood], A537  
 tracheal, intraluminal gauge pressure affects ignition by CO<sub>2</sub> laser [Davis, Pashayan, Cassisi, Roan, Gravenstein], A1070
- valves**  
 expiratory, severity of incompetence alters minimum inspired carbon dioxide and capnogram [Good, Gravenstein, Lampotang, Blackshear], A514
- vaporizers**  
 Ohmeda (R) fluotec-4, output near MRI magnet [Rao, Krishna, Baldwin, Robbeloth], A476
- ventilators**  
 anesthesia, performance of, delivered tidal volume, and PEEP [Pan, van de Aa], A420  
 exquisite management of pressure control inverse ratio ventilation by a computerized protocol [East, Böhm, Peng, Wallace, Morris], A284
- Erythrocytes. See under Blood**  
**Esmolol. See under Sympathetic nervous system**  
**Estrogen. See under Hormones**  
**Etomidate. See under Anesthetics, intravenous**  
**Evoked potentials. See under Brain**  
**Extubation. See under Anesthetic techniques**
- Eyes**  
 blood flow  
 retinal, effects of enflurane on, in cats [Roth, Crittenden], A345  
 retinal, effects of hemodilution on, in cats [Roth, Crittenden], A652  
 cornea  
 ischemia-mediated metabolic alterations produce activation of A-delta and C fibers [MacIver, Tanelian], A667

- intraocular pressure**  
 changes after tracheal intubation in children [Watcha, White, Chu, Stevens], A1096  
 esmolol attenuates increase in, during laryngoscopy and intubation [Badrinath, Braverman, Ivankovich], A382  
 preretinal oxygen tension during enflurane anesthesia in cats [Roth, Neeley, Ernest, Goldstick, Moss], A383
- pupils**  
 human pupillary light reflex during hypothermia [Larson, Sessler], A214  
 isoflurane impairs pupillary light reflex in humans [Larson, Sessler], A408
- reflexes**  
 pupillary light, human, during hypothermia [Larson, Sessler], A214  
 pupillary light, in human, isoflurane impairment of [Larson, Sessler], A408  
 relationship of retrobulbar local anesthetic spread to neural membranes of eyeball, optic nerve and arachnoid villi in optic nerve [Shantha], A850

F

- Famotidine. See under Histamine**  
**Fasciculation. See under Muscle, skeletal**  
**Fentanyl. See under Analgesics; Anesthetics, intravenous**  
**Filters. See under Equipment**  
**Filtration. See under Kidney**  
**Fluid balance**  
 different cardiovascular responses to volume expansion during halothane and isoflurane anesthesia [Mayer, Zimpfer], A568  
 hyponatremia in TURP patient: does IV fluid choice make a difference? [Landry, Schwartz, Cope], A1029  
 impact of postoperative epidural bupivacaine infusion on intravascular and extracellular fluid compartments [Burgess, Brooks, Wade, Perkins, Rodkey], A841  
 resuscitation fluids for treatment of hemorrhagic shock in dogs: effects on myocardial blood flow [Larson, Tait], A633
- Flumazenil. See under Antagonists, miscellaneous**  
**Flunitrazepam. See under Anesthetics, intravenous**  
**Fluorocarbon. See under Blood**  
**Fructose. See under Metabolism**

G

- Gamma-aminobutyric acid. See under Brain**  
**Ganglionic blockade. See under Sympathetic nervous system**  
**Gases, nonanesthetic**  
 carbon monoxide  
 intraoperative toxicity [Moon, Meyer, Scott, Fox, Millington, Norwood], A1049  
 helium  
 continuous flow apneic ventilation with helium-oxygen in dogs with bronchopleural fistula [Garcia, Bunegin, Smith], A1186  
 development of an automated laser interrupter for [Gibby, Hathiram], A527  
 effect of, on endotracheal tube flammability during KTP/532 laser use [AlHaddad, Brenner], A491
- Gas tensions. See under Measurement techniques**  
**Gastrointestinal tract**  
 antacids  
 antiemetic action of ranitidine in outpatient laparoscopy under propofol-isoflurane anesthesia [Kraynack, Bates], A14  
 comparative study of, in emergency obstetrical anesthesia: effects

- on pH and volume of gastric content [Armand, Jasson, Mazuir, Talafre, Tallet, Conseiller], A987
- effect of H<sub>2</sub> antagonists on gastric volume and pH [Hass, Pablo, Brian, Olsen], A29
- oral effervescent cimetidine in daycase anesthesia: effects on gastric pH and volume [Narchi, Edouard, Bourget, Cattaneo, Peiti, Benhamou], A6
- ranitidine: role of dose and time effect study for prophylaxis of perioperative acid aspiration [Vinik, Covarrubias], A13
- sucralate does not reduce risk of aspiration pneumonia [Toung, Aizawa, Grayson, Reily, Dorman, Traystman], A274
- effects of three modes of abdominal compression on vital organ blood flow in piglet CPR model [Eberle, Schleien, Shaffner, Koehler, Traystman], A300
- intestine**
- contribution of carotid chemoreceptors to changes in mesenteric vein diameter during acute hypercapnia in rabbit [Tominaga, Stekiel, McCallum, Bosnjak, Kampine], A632
- halothane attenuates mesenteric venoconstriction in response to graded hypercapnea [Stekiel, Tominaga, Bosnjak, Kampine], A578
- oxygenation of porcine gut is reduced by halothane but is maintained by ketamine [Tokuy, Loick, Stothert, Jr., Traber, Herndon], A312
- rate of enteral feeding is important for gut maintenance [Zaloga, Prielipp, Ward], A283
- stomach**
- autonomic neuropathy and gastric volume in anesthetized patient [Cejudo, Kawas, Giesecke], A16
- comparative study of two oral antacids in emergency obstetrical anesthesia: effects on pH and volume of gastric content [Armand, Jasson, Mazuir, Talafre, Tallet, Conseiller], A987
- effect of prostaglandin E1 on gastric secretion in humans during anesthesia [Mashimo, Takashina, Uchiyama, Seto, Yoshiya], A182
- effects of famotidine on gastric acidity and volume in ambulatory surgery patients [Kao, Schaub, Tellez], A47
- influence of rectal cisapride on morphine-induced gastric stasis [Kluger, Owen, Plummer], A326
- ultrasound examination of contents of, in pregnant patients [Carp, Jayaram, Cramp], A957
- Genetic factors**
- comparison of caffeine halothane contracture test with molecular genetics diagnosis of malignant hyperthermia [Allen, MacKenzie, Lahey, Crossan, Nolan, Mettler, Worton, MacLenan, Korneluk], A711
- enhanced expression of proto-oncogene C-FOS protein in rats given ketamine [Mueller, Gillam, Grimes, Breese], A724
- malignant hyperthermia susceptibility: hormone sensitive lipase suggested as candidate gene [Levitt, McKusick, Shutack, Heiman-Patterson, Rosenberg, Fletcher], A700
- Geriatric anesthesia. See under Anesthesia**
- GI-64. See under Neuromuscular relaxants**
- Glomerular function. See under Kidney**
- Glucagon. See under Hormones**
- Glucocorticoids. See under Hormones**
- Glucose. See under Metabolism**
- Growth hormone. See under Hormones**
- Gynecological surgery. See under Surgery**
- H**
- Halothane. See under Anesthetics, volatile**
- Headache. See under Complications**
- Heart. See also under Surgery, transplantation**
- adenosine
- coronary microvessel segmental resistances during vasodilation by isoflurane, nitroglycerin and, in dogs [Conzen, Habazettl, Christ, Baier, Vollmar, Goetz, Brendel, Peter], A613
- amrinone**
- dobutamine and, effect of order of administration of, on guinea-pig heart muscle [Cork, Behr, Mackey, DiNardo], A375
- dobutamine and, interaction effects on guinea pig heart muscle and [Cork, Behr, Gallo], A665
- regional myocardial metabolism, hypoperfusion in dogs, and [Sidi, Pool, Rush], A547
- anesthetics**
- effects of ketamine and thiopental on myocardial contractility and function in hypovolemic swine [Silverman, Ward, Kingsley, Williams, Farooqui], A65
- arrhythmia**
- effects of isoflurane on coronary flow and development of dysrhythmias during ischemia and reperfusion [Boban, Buljubasic, Stowe, Marijic, Bosnjak], A654
- global ischemia and reperfusion in vitro: effects of halothane on contractility and development of dysrhythmias [Buljubasic, Marijic, Stowe, Kampine, Bosnjak], A579
- hemodynamic interaction of epinephrine with specific bradycardic agent UL-FS 49 [Lasker, Hillel, Benjamin, Shiang], A593
- intraoperative changes in respiratory sinus arrhythmia: an indicator of anesthetic depth [Latson, Martin, Isaac], A520
- respiratory sinus, analysis of, during spinal anesthesia: evaluation of vagal tone in relation to anesthetic level [Baeuerle, Fox, Menk, Kingsley, Dellinger], A510
- transesophageal atrial pacing for intraoperative bradycardia: pacing thresholds with modified esophageal stethoscope in adults [Pattison, Mathews, Entress, Altee], A138
- artificial**
- transesophageal atrial pacing for intraoperative bradycardia: pacing thresholds with modified esophageal stethoscope in adults [Pattison, Mathews, Entress, Altee], A138
- atria**
- improved intraoperative detection of interatrial shunts by transesophageal echocardiography [Konstadt, Louie, Kanuri, Rao, Scanlon], A1209
- interatrial septal responses to transatrial pressure gradients and their potential for predicting pulmonary capillary wedge pressure [Kusumoto, Muhiudeen, Cahalan, Schiller], A149
- blood flow**
- attenuation of baroreflex response to acute hypotension by nitroprusside during intracoronary infusion of ATP [Taneyama, Goto, Nakazawa, Unruh, Arakawa], A650
- contrast echocardiography: direct, on-line, intraoperative assessment of regional myocardial perfusion during CABG surgery [Aronson, Lee, Wiencek, Feinstein, Roizen, Karp, Ellis], A1208
- coronary bypass graft flow vasodilation induced by isoflurane has only negligible effects on left ventricular systolic function [Leclerc, Fratacci, Dupuy, Payen], A147
- coronary microvessel diameters and coronary hemodynamics during nitrous oxide in dogs [Vollmar, Conzen, Habazettl, Adili, Peter, Brendel], A565
- coronary microvessel segmental resistances during vasodilation by isoflurane, nitroglycerin and adenosine in dogs [Conzen, Habazettl, Christ, Baier, Vollmar, Goetz, Brendel, Peter], A613
- desflurane: hemodynamic actions compared to halothane, isoflurane and enflurane in chronically instrumented dogs [Pagel, Schmeling, Kampine, Warltier], A580
- dose response study comparing coronary circulatory effects of isoflurane and enflurane in normal dog [Elia, Liu], A634

- effect of two inhalation anesthetics on hemodynamics, coronary flow, and myocardial metabolism in patients with left main coronary lesion [Kirvassilis, Pulley, Kater, Genton, Kelermenos, Lappas], A89
- effects of desflurane and isoflurane on cardiovascular and coronary dynamics in chronically instrumented dog [Merin, Bernard, Doursout, Chelly], A552
- effects of isoflurane on coronary flow and development of dysrhythmias during ischemia and reperfusion [Boban, Buljubasic, Stowe, Marijic, Bosnjak], A654
- effects of midazolam and flumazenil on coronary circulation and contractility of isolated rabbit heart [Samain, Baron, Mouren, Dreux, Soughir, Viars], A642
- effects of propofol on coronary circulation and myocardial performance of isolated rabbit heart [Baron, Soughir, Arthaud, Mouren, Viars], A561
- high  $PO_2$  improves flow and function in ischemic myocardium [Cason, Wisneski, Hickey, Shnier, Gertz], A598
- hypocapnia and hypercapnia cause heterogeneous changes in, [Czinn, Salem, Crystal], A661
- integrated coronary and systemic hemodynamic response to graded inspiratory resistive loading in chronically instrumented anesthetized dogs [Peters, Ihle], A611
- isoflurane induces coronary steal compared to enflurane in dog model of critical coronary stenosis [Elia, Liu], A657
- isradipine reverses coronary constrictor effects of dexmedetomidine [Flacke, Flacke, de Lange, Lawrence, Prinzen], A608
- mechanisms mediating modulation of baroreflex regulation of coronary conductance by fenatnyl in chronically instrumented dogs [Moore, Porges, White, Quail], A664
- nitrous oxide and coronary artery constriction in pigs [Pettis, Sill, Bertha, Witzeling, Rorie], A553
- propofol, thiopental and contractile responses in isolated pig coronary arteries and cultured vascular smooth muscle cells [Ozhan, Sill, Katusic, Rorie, Uhl], A583
- resuscitation fluids for treatment of hemorrhagic shock in dogs: effects on [Larson, Tait], A633
- total coronary resistance and vessel segment resistances during adenosine-induced hypotension [Habazettl, Conzen, Christ, Baier, Vollmar, Peter, Brendel], A645
- bradycardia**
- hemodynamic interaction of epinephrine with UL-FS 49 [Lasker, Hillel, Benjamin, Shiang], A593
- transesophageal atrial pacing for: pacing thresholds with modified esophageal stethoscope in adults [Pattison, Mathews, Entress, Altee], A138
- cardiac output**
- comparative cardiovascular depression of halothane in neonates and infants [Murray, Forbes, Mahoney], A1132
- different cardiovascular responses to volume expansion during halothane and isoflurane anesthesia [Mayer, Zimpfer], A568
- distribution in dogs hemodiluted with 5% albumin or 10% hemoglobin [Rooney, Wat, Hirsch, Mathru, Rao], A659
- does use of methymethacrylate cement induce hemodynamic or pulmonary instability? [Huffnagle, Torjman, Marr, Fenlin, Seltzer], A1021
- effects of anesthetic overdose with isoflurane and sevoflurane on hemodynamics and oxygenation [Cork, DiNardo, Hilwig, Kern], A1077
- effects of hemopump on organ blood flow distribution during cardiogenic shock in dogs [Wouters, Möllhoff, Mees, Van Aken, Flameng], A444
- effects of isoflurane on hemodynamic changes following infrarenal aortic cross clamping [Menguy, Winckler], A77
- effects of three modes of abdominal compression on vital organ blood flow in piglet CPR model [Eberle, Schleien, Shaffner, Koehler, Traystman], A300
- failure to increase with pacing in cardiac surgical patients [Johnston, Robertie, Dudas, Kon, Vinten-Johansen], A81
- hemodynamic and oxygenation changes with continuous venous-venous hemodialysis [Gerard, Patel, Mohr, Johnson], A267
- hypocapnia and hypercapnia cause heterogeneous changes in regional organ blood flow [Czinn, Salem, Crystal], A661
- low-dose thoracic epidural anesthesia induces discrete thoracic analgesia without reduction in [Tanaka, Harada], A127
- main factor of variation of mixed venous oxygen saturation during general anesthesia [Annat, Ravat, Viale, Pommier, Brudon], A1199
- reliability of new generation transesophageal Doppler device for monitoring of [Schmid, Spahn, Tornic], A415
- conduction**
- actions of halothane, enflurane and isoflurane on purkinje fibers in noninfarcted and infarcted canine hearts [Turner, Polic, Marijic, Hoffman, Bosnjak], A588
- effects of halothane and epinephrine on automaticity of dominant and subsidiary atrial pacemakers [Bosnjak, Polic, Laszlo, Kampine, Atlee], A576
- contractility**
- amiodarone and halothane: effects on canine purkinje fiber action potentials [Gallagher, Bianchi, Gessman], A663
- amrinone, dobutamine, and interaction effects on guinea pig heart muscle [Cork, Behr, Gallo], A665
- comparative dose response cardiac effects of thiopental, etomidate, ketamine and propofol in perfused, isolated guinea pig hearts [Stowe, Peller, Buljubasic, Marijic, Kampine, Bosnjak], A589
- depressive effect of isoflurane on myocardial beta-adrenergic responsiveness is not related to alternation of beta-receptor density [Lancon, Marty, Delforge, Janier, Syrota], A638
- desflurane: hemodynamic actions compared to halothane, isoflurane and enflurane in chronically instrumented dogs [Pagel, Schmeling, Kampine, Warltier], A580
- effects of halothane on development of dysrhythmias and: global ischemia and reperfusion in vitro [Buljubasic, Marijic, Stowe, Kampine, Bosnjak], A579
- effects of hemodilution and anesthesia on regional function of compromised myocardium [Leone, Spahn, McRae, Smith], A596
- effects of ketamine and thiopental on, in hypovolemic swine [Silverman, Ward, Kingsley, Williams, Farooqui], A65
- effects of midazolam and flumazenil on coronary circulation and, of isolated rabbit heart [Samain, Baron, Mouren, Dreux, Soughir, Viars], A642
- effects of nitrous oxide on, of isolated mammalian ventricular myocardium [Carton, Wanek, Housmans], A1271
- effects of preload and afterload on contraction of post-ischemic myocardium [Buffington, Coyle], A649
- effects of propofol on, of isolated rabbit papillary muscles under various stimulation conditions [Rusy, Thomas-King, King, Komai], A560
- heparin: a myocardial depressant? [Lee, Virtussio, Lin, Wu], A605
- inotropic effect of etomidate on cardiac papillary muscle in normal and cardiomyopathic hamsters [Riou, Lecarpentier, Viars], A647
- inotropic effect of ketamine on cardiac papillary muscle in normal and cardiomyopathic hamsters [Riou, Lecarpentier, Viars], A555
- myocardial depression by nitrous oxide: mechanism of action [Caron, Wanek, Housmans], A575
- myocardial depression induced by magnesium and nifedipine in

- isolated perfused rat heart [Payne, Roper, Spielman, Carter, Mueller, Thorp], A945
- propofol, thiopental and, in isolated pig coronary arteries and cultured vascular smooth muscle cells [Ozhan, Sill, Katusic, Rorie, Uhl], A583
- coronary occlusion**
- actions of halothane, enflurane and isoflurane on purkinje fibers in noninfarcted and infarcted canine hearts [Turner, Polic, Marijic, Hoffman, Bosnjak], A588
  - comparison of cold pressor stress test with computerized 22 site ECG/ST mapping system and dipyridamole stress thallium scanning for determining significant coronary artery disease [Seegobin, Wilmshurst, Morrels, Cleloe], A119
  - effect of anesthetic technique on right coronary artery disease patients who have elevated pulmonary artery pressure [Howie, Romanelli, Rypel, Howie], A154
  - effect of aortic occlusion on canine stunned myocardium [Mazer, Beauchamp, Belo, Kay, Irish], A594
  - effect of carbon dioxide on regional myocardial tissue oxygen tension in dogs with coronary stenosis [Okazaki, Hashimoto, Okutsu, Okumura, Fukunaga], A549
  - effect of diltiazem on regional left ventricular function in presence of gradual coronary constriction in dog [Goldberg, Diederichs, Sear, Ryder, Foex], A637
  - effects of propofol on function of normal, collateral dependent and ischemic myocardium [Mayer, Weinstable, Legat, Zimpfer], A569
  - endothelium dependent relaxation in canine coronary collateral vessels [Flynn, Bosnjak, Warltier, Kampine], A590
  - hemodynamic effects of intravenous dilevalol in patients with coronary artery disease [Demeyere, Flameng, Tjandra Maga], A122
  - isoflurane induces coronary steal compared to enflurane in dog model of critical coronary stenosis [Elia, Liu], A657
  - tachycardia increases extent of right ventricular necrosis following reperfusion and [Johnston, Vinten-Johansen, Tammasi], A639
- diltiazem**
- effect of, on regional left ventricular function in presence of gradual coronary constriction in dog [Goldberg, Diederichs, Sear, Ryder, Foex], A637
- dobutamine**
- amrinone and, interaction effects on guinea pig heart muscle and [Cork, Behr, Gallo], A665
  - effect of order of administration of amrinone and, on guinea-pig heart muscle [Cork, Behr, Mackey, DiNardo], A375
  - effects of, on hepatic blood flow and oxygen balance during anesthesia of liver surgery [Kainuma, Nonami, Kimura, Nakashima, Shimada], A66
  - influence of, on relationship between O<sub>2</sub> delivery and O<sub>2</sub> consumption during anesthesia and hemodilution [Janvier, Payen, Dardel, Mary], A159
- echocardiography**
- combination of thoracic epidural and light general anesthesia does not induce myocardial segmental wall motion abnormalities [Saada, Catoire, Delaunay, Brun, Bonnet], A132
  - contrast, direct, on-line, intraoperative assessment of regional myocardial perfusion during CABG surgery [Aronson, Lee, Wiencek, Feinstein, Roizen, Karp, Ellis], A1208
  - contrast, assessment of regional myocardial cardioplegia distribution with, in dogs: retrograde vs. antegrade delivery methods [Aronson, Lee, Leddicoat, Wiencek, Zaroff, Ellis Feinstein, Roizen], A567
  - in evaluation of maternal myocardial function during cesarean delivery under regional anesthesia [Palmer, Fenster, Boswell, Scipione], A939
  - intraoperative, in children with congenital cardiac shunt lesions: comparison of transesophageal and epicardial [Muhiudeen, Roberson, Silverman, Turley, Haas, Corver, Cahalan], A103
  - intraoperative, in infants and children with regurgitant valvar lesions: comparison of TEE and epicardial [Muhiudeen, Roberson, Silverman, Turley, Haas, Corver, Cahalan], A104
  - "pressure rate quotient" is not an indicator of myocardial ischemia in humans: an echocardiographic evaluation [Harris, Gordon, Urban, O'Connor, Barash], A157
  - reliability of new generation transesophageal Doppler device for cardiac output monitoring [Schmid, Spahn, Tornic], A415
  - right ventricular wall motion following cardiopulmonary bypass [Rafferty, Durkin, Eleftheriades, Hines, O'Connor], A158
  - transesophageal, abnormal findings of descending thoracic aorta in patients undergoing coronary artery bypass surgery examined by [Orihashi, Keehn, Hong, Sisto, Goldiner, Oka], A431
  - transesophageal, atelectasis and pleural fluid examined by, during coronary artery bypass grafting [Hong, Orihashi, Keehn, Sisto, Goldiner, Oka], A454
  - transesophageal, improved intraoperative detection of interatrial shunts by [Konstadt, Louie, Kanuri, Rao, Scanlon], A1209
  - transesophageal, left ventricular function in brain dead donors: assessment using [Goarin, Cohen, Jacquens, LeBret, Clergue, Viars], A84
  - transesophageal, locations of retained intracardiac air in coronary artery bypass grafting using [Orihashi, Hong, Keehn, Goldiner, Oka], A430
  - transesophageal, TAPSE can be reproducibly quantified by [Durkin, Rafferty], A468
  - transesophageal Doppler cardiac output determination in critical care patients [Glance, Keefe, Carlon], A501
  - transesophageal Doppler mitral flow indices and ventricular relaxation [Hillel, Thys], A116
  - two-dimensional echocardiographic determination of right ventricular maximum minor axis dimension fractional shortening [Durkin, Rafferty], A542
- electrocardiography**
- detection of ST segment abnormalities using artificial neural networks [Navabi, Hameroff, Watt, Mylrea], A436
  - estimation of ischemic territory by continuous vectorcardiography in closed chest myocardial infarction model [Reiz, Näslund, Häggmark, Johansson], A418
  - preoperative, should they be officially interpreted by cardiologists prior to anesthesia? [Wolman, Lasecki, Shapiro, Porter, Kane], A1026
  - real time simulation of cardiac electrophysiology [Gaba, Benlich], A1069
  - real time ST segment analysis following abdominal aortic aneurysm resection [Mathews, Weissman], A1228
- epinephrine**
- does propofol sensitize heart to? [Kamibayashi, Sumikawa, Yamatodani, Hayashi, Yoshiya], A562
  - effects of halothane and, on automaticity of dominant and subsidiary atrial pacemakers [Bosnjak, Polic, Laszlo, Kampine, Atlee], A576
  - hemodynamic interaction of, with specific bradycardic agent UL-FS 49 [Lasker, Hillel, Benjamin, Shiang], A593
- flunarizine**
- indications for use of pacing pulmonary artery catheters [Risk, D'Ambra, Koski, Brandon, Philbin], A160
  - pretreatment prevents myocardial stunning [Boutros, Mattheussen, Van Aken, Flameng], A573
- inotropism**
- amrinone, regional myocardial metabolism, and hypoperfusion in dogs [Sidi, Pool, Rush], A547

- effect of order of administration of amrinone and dobutamine on guinea-pig heart muscle [Cork, Behr, Mackey, DiNardo], A375
- hemodynamic effects of PDE inhibitor piroximone to assist in weaning from CPB [Tarr, Frazer, Moore, Desmond], A120
- hemodynamic effects of variable dose IV milrinone following cardiac surgery [European Multicenter Milrinone Trial Group], A133
- influence of dobutamine on relationship between O<sub>2</sub> delivery and O<sub>2</sub> consumption during anesthesia and hemodilution [Janvier, Payen, Dardel, Mary], A159
- inotropic and electrophysiological effects of propofol on isolated ventricular myocardium [Roewer, Winguth, Proske, Dziadzka, Schulte am Esch], A381
- inotropic effect of etomidate on cardiac papillary muscle in normal and cardiomyopathic hamsters [Riou, Lecarpentier, Viars], A647
- inotropic effect of ketamine on cardiac papillary muscle in normal and cardiomyopathic hamsters [Riou, Lecarpentier, Viars], A555
- inotropic effects of nitroglycerin, nitroprusside and trimethaphan on isolated rabbit myocardium [Lee, Virtusio, Lin, Wu], A629
- naloxone potentiates inotropic but not chronotropic effects of isoproterenol in vitro [Lechner], A587
- ischemia**
- actions of halothane, enflurane and isoflurane on purkinje fibers in noninfarcted and infarcted canine hearts [Turner, Polic, Marijic, Hoffman, Bosnjak], A588
- bupivacaine and, study in pig in situ heart [Freysz, Timour, Loufoua, Bertrix, Gerentes, Faucon], A610
- in canine heart, effects of bunazosin, a new alpha-1 blocker, on regional myocardial function [Kono, Morita, Hayashi, Sato], A616
- combination of thoracic epidural and light general anesthesia does not induce myocardial segmental wall motion abnormalities [Saada, Catoire, Delaunay, Brun, Bonnet], A132
- comparison of cold pressor stress test with computerized 22 site ECG/ST mapping system and dipyridamole stress thallium scanning for determining significant coronary artery disease [Seegobin, Wilmshurst, Morrels, Cleloe], A119
- dipyridamole thallium scan is not accurate in detecting coronary stenosis in patients undergoing abdominal aortic surgery [Bertrand, Coriat, Baron, Barre, Thomas, Viars], A86
- does choice of anesthetic have effect on, during anesthetic induction and intubation? [Leung, Levenson, Hollenberg], A99
- effect of two inhalation anesthetics on hemodynamics, coronary flow, and myocardial metabolism in patients with left main coronary lesion [Kirvassilis, Pulley, Kater, Genton, Kelermenos, Lappas], A89
- effects of anesthetics and steal-prone anatomy on [Leung, O'Kelly, Mangano], A100
- effects of isoflurane on coronary flow and development of dysrhythmias during reperfusion and [Boban, Buljubasic, Stowe, Marijic, Bosnjak], A654
- effects of preload and afterload on contraction of post-ischemic myocardium [Buffington, Coyle], A649
- estimation of ischemic territory by continuous vectorcardiography in closed chest myocardial infarction model [Reiz, Näslund, Häggmark, Johansson], A418
- failure of A21-aminosteroid to improve postischemic myocardial function of isolated rat heart [Pretto], A301
- functional damage of coronary endothelium after a short duration of, is reversible [Fomsgaard, White, Moore, Kim], A582
- global, and reperfusion in vitro: effects of halothane on contractility and development of dysrhythmias [Buljubasic, Marijic, Stowe, Kampine, Bosnjak], A579
- in healthy parturients during cesarean delivery [Mathew, Fleisher, Sevarion, Rosenbaum], A992
- high PO<sub>2</sub> improves flow and function in [Cason, Wisneski, Hickey, Shnier, Gertz], A598
- impedance as an early marker for, [Romanelli, Howie, Hartzler, Liu, Kern, McSweeney], A482
- incidence of, during weaning and extubation in high-risk surgical intensive care patients [Wang, Leibowitz, Halpern, Oropello, DiStefano, Abalos, Iberti], A525
- influence of anesthesia on pacing-induced threshold in [Spahn, Leone, McRae, Smith], A595
- limited predictive value of dipyridamole thallium imaging in non-cardiac surgery patients [Fleisher, Hawes, Rosenbaum], A75
- perioperative myocardial ischemia is associated with elevated left ventricular wall mass [Busse, Ellis], A67
- postoperative myocardial ischemia in patients undergoing coronary artery bypass graft surgery [Smith, Leung, Mangano], A79
- preoperative, predictive value of, for postoperative, in vascular and nonvascular surgery patients [Fleisher, Rosenbaum, Hawes, Barash], A76
- preoperative predictive factors of, prior to bypass to CABG patients [Fischler, Ceddaha, Schlumberger, Raffin, Dubois], A151
- "pressure rate quotient" is not an indicator of, in humans: an echocardiographic evaluation [Harris, Gordon, Urban, O'Connor, Barash], A157
- real time ST segment analysis following abdominal aortic aneurysm resection [Mathews, Weissman], A1228
- systolic pressure variation may unmask, upon weaning from cardiopulmonary bypass [Perel, Koman, Geva, Smolinsky], A137
- isradipine**
- reverses coronary constrictor effects of dexmedetomidine [Flacke, Flacke, de Lange, Lawrence, Prinzen], A608
- metabolism**
- amiodarone and halothane: effects on canine purkinje fiber action potentials [Gallagher, Bianchi, Gessman], A663
- amrinone, hypoperfusion and, in dogs [Sidi, Pool, Rush], A547
- effect of aortic occlusion on canine stunned myocardium [Mazer, Beauchamp, Belo, Kay, Irish], A594
- effect of two inhalation anesthetics on hemodynamics, coronary flow, and, in patients with left main coronary lesion [Kirvassilis, Pulley, Kater, Genton, Kelermenos, Lappas], A89
- effects of lidocaine analog QX-314 on single cardiac sodium channels [Gingrich, Yue], A372
- endothelium dependent relaxation in canine coronary collateral vessels [Flynn, Bosnjak, Warltier, Kampine], A590
- evidence for existence of inositol pentakis/hexakisphosphate in heart by new picomolar-mass HPLC analysis [Scholz, Troll, Sandig, Schmitz, Schulte am Esch], A713
- functional damage of coronary endothelium after a short duration of ischemia is reversible [Fomsgaard, White, Moore, Kim], A582
- halothane depresses gallopomil binding to bovine heart sarcolemma [Hoehner, Quigg, Blanck], A370
- heart rate dependent effects of volatile anesthetics on cardiac sarcoplasmic reticulum [Winguth, Roewer, Hunerbein, Rumberger, Schulte am Esch], A658
- hypoxemia does not inhibit cardiac mitochondrial enzymes [Rothstein, Cao], A643
- isoflurane, halothane and responses to endothelin in pig coronary

- arteries and cultured vascular smooth muscle cells [Ozhan, Sill, Hughes, Uhl, Blaise], A584
- isoflurane, halothane and second messenger pathways in isolated pig coronary arteries [Ozhan, Sill, Katusic, Nelson, Iaizzo], A554
- isoflurane and halothane and responses of cultured pig coronary artery endothelial cells [Uhl, Sill, Nelson, Johnson, Blaise], A621
- myocardial intracellular  $\text{Ca}^{++}$  "overload" is cause of arrhythmia during hypokalemia [Albrecht, Hansen, Miletich], A636
- oxygen dependency of doxorubicin cardiotoxicity in perfused rat hearts [Mueller, Carter, Ganey, Thurman], A563
- propofol, thiopental and contractile responses in isolated pig coronary arteries and cultured vascular smooth muscle cells [Ozhan, Sill, Katusic, Rorie, Uhl], A583
- propofol decreases voltage activated calcium currents in rabbit heart myocytes [Wegrzynowicz, Matsuda, Volk, Shibata, Wachtel], A592
- myocardial function**
- amrinone, dobutamine, and interaction effects on guinea pig heart muscle [Cork, Behr, Gallo], A665
- amrinone, regional myocardial metabolism, and hypoperfusion in dogs [Sidi, Pool, Rush], A547
- assessment of regional myocardial cardioplegia distribution with contrast echocardiography in dogs: retrograde vs. antegrade delivery methods [Aronson, Lee, Leddicot, Wiencek, Zaroff, Ellis Feinstein, Roizen], A567
- combination of thoracic epidural and light general anesthesia does not induce myocardial segmental wall motion abnormalities [Saada, Catoire, Delaunay, Brun, Bonnet], A132
- comparative dose response cardiac effects of thiopental, etomidate, ketamine and propofol in perfused, isolated guinea pig hearts [Stowe, Peller, Buljubasic, Marjic, Kampine, Bosnjak], A589
- compared to enflurane, isoflurane produces less depression of stroke volume and autonomic response of canines given phenylephrine [Hoffman, Koev, Solomon, Banks, Yatsiv, Dolan, Clements, Natanson], A410
- contrast echocardiography: direct, on-line, intraoperative assessment of regional myocardial perfusion during CABG surgery [Aronson, Lee, Wiencek, Feinstein, Roizen, Karp, Ellis], A1208
- coronary bypass graft flow vasodilation induced by isoflurane has negligible effects on left ventricular systolic function [Leclerc, Fratacci, Dupuy, Payen], A147
- correlation between left-ventricular end-diastolic volume and PWCP [Glance, Keefe, Carlson], A499
- determinants of ventricular performance during induction of anesthesia on heart transplant recipients [Dikel, Gruber, Watkins, Estrin], A107
- dipyridamole thallium scan is not accurate in detecting coronary stenosis in patients undergoing abdominal aortic surgery [Bertrand, Coriat, Baron, Barre, Thomas, Viars], A86
- direct and indirect effects of ketamine on mammalian ventricular myocardium [Cook, Caron, Housmans], A617
- do radial artery pressure waveforms reflect it? [Pauca, Wallenhaupt, Kon], A60
- effect of anesthetic technique on right coronary artery disease patients who have elevated pulmonary artery pressure [Howie, Romanelli, Rypel, Howie], A154
- effect of aortic occlusion on canine stunned myocardium [Mazer, Beauchamp, Belo, Kay, Irish], A594
- effect of hypertonic saline resuscitation on, in hemorrhagic shock model: assessment by pressure-volume loops [Mathru, Rooney, Vengurlekar, Hirsch, Rao], A635
- effect of two inhalation anesthetics on hemodynamics, coronary flow, and myocardial metabolism in patients with left main coronary lesion [Kivassilis, Pulley, Kater, Genton, Kelermenos, Lappas], A89
- effect of volatile anesthetics on hypothermic myocardium [Matheussen, Boutros, Van Aken, Flameng], A574
- effects of hemopump on organ blood flow distribution during cardiogenic shock in dogs [Wouters, Möllhoff, Mees, Van Aken, Flameng], A444
- effects of hypothermia and potassium variations on maximum diastolic potential [Laszlo, Sprung, Polic, Kampine, Bosnjak], A263
- effects of isoflurane on hemodynamic changes following infrarenal aortic cross clamping [Menguy, Winckler], A77
- effects of ketamine and thiopental on myocardial contractility and function in hypovolemic swine [Silverman, Ward, Kingsley, Williams, Farooqui], A65
- effects of nitrous oxide on contractility and relaxation of isolated mammalian ventricular myocardium [Carton, Wanek, Housmans], A1271
- effects of preload and afterload on contraction of post-ischemic myocardium [Buffington, Coyle], A649
- effects of propofol on coronary circulation and, of isolated rabbit heart [Baron, Soughir, Arthaud, Mouren, Viars], A561
- effects of propofol on function of normal, collateral dependent and ischemic myocardium [Mayer, Weinstable, Legat, Zimpfer], A569
- effects of vasoactive agents, hypoxia and volume on estimation of left atrial pressure in pigs [Gunning, Paulsen], A655
- flunarizine pretreatment prevents myocardial stunning [Boutros, Matheussen, Van Aken, Flameng], A573
- global, do changes in myocardial wall-thickening fractions reflect changes in? [Williams, Brooks, Chelly, Sweeney, Hanley, Rabinovitz, Hartley], A162
- heart rate dependent effects of volatile anesthetics on cardiac sarcoplasmic reticulum [Winguth, Roewer, Hunerbein, Rumberger, Schulte am Esch], A658
- hemodynamic effects of intravenous dilevalol in patients with coronary artery disease [Demeyere, Flameng, Tjandra Maga], A122
- hemodynamic effects of PDE inhibitor piroximone to assist in weaning from CPB [Tarr, Frazer, Moore, Desmond], A120
- heparin: a myocardial depressant? [Lee, Virtussio, Lin, Wu], A605
- high  $\text{PO}_2$  improves flow and function in ischemic myocardium [Cason, Wisneski, Hickey, Shnier, Gertz], A598
- influence of anesthesia on pacing-induced ischemia threshold [Spahn, Leone, McRae, Smith], A595
- inotropic and electrophysiological effects of propofol on isolated ventricular myocardium [Roewer, Winguth, Proske, Dziadzka, Schulte am Esch], A381
- inotropic effect of etomidate on cardiac papillary muscle in normal and cardiomyopathic hamsters [Riou, Lecarpentier, Viars], A647
- inotropic effects of nitroglycerin, nitroprusside and trimethaphan on isolated rabbit myocardium [Lee, Virtussio, Lin, Wu], A629
- interatrial septal responses to transatrial pressure gradients and their potential for predicting pulmonary capillary wedge pressure [Kusumoto, Muhiudeen, Cahalan, Schiller], A149
- is viral myocarditis an asymptomatic disease? [Roizen, Apfelbaum, Coalson, Rupani, Finn, Roberts, Lichtor, Schreider], A1038
- left ventricular, ephedrine vs. phenylephrine for hypotension due to thoracic epidural anesthesia associated with general anesthesia: effects on [Samain, Coriat, LeBret, Baron, Vrints, Viars], A82
- left ventricular, in brain dead donors: assessment using trans-



- esophageal echocardiography [Goarin, Cohen, Jacquens, LeBret, Clergue, Viars], A84
- left ventricular, poor, etomidate modifies hemodynamic response to high dose fentanyl induction in patients with, randomized study [Schlumberger, Cedda, Raffin, Dubois, Fischler], A152
- left ventricular ejection fraction and compliance in patients with cardiorespiratory failure with and without septic shock [Kuss, Hannemann, Bayer, Steingasser, Reinhart], A291
- left ventricular systolic thickening velocity, not fraction, is index of [Dupuy, Boisson, Schurando, Tibourtine, Payen], A131
- limited predictive value of dipyridamole thallium imaging in non-cardiac surgery patients [Fleisher, Hawes, Rosenbaum], A75
- myocardial adaptation during extreme hemodilution in humans [Mathru, Kleinman, Dries, Blakeman, Zecca], A236
- myocardial depression by nitrous oxide: mechanism of action [Caron, Wanek, Housmans], A575
- myocardial depression induced by magnesium and nifedipine in isolated perfused rat heart [Payne, Roper, Spielman, Carter, Mueller, Thorp], A945
- myocardial intracellular  $Ca^{++}$  "overload" is cause of arrhythmia during hypokalemia [Albrecht, Hansen, Miletich], A636
- negative inotropic effects of propofol vs. thiopental: assessment in isolated ventricular septum model [Lin, Lee, Lee, Virtusio, Wu], A564
- perioperative myocardial ischemia is associated with elevated left ventricular wall mass [Busse, Ellis], A67
- postischemic, failure of A2I-aminosteroid to improve, of isolated rat heart [Pretto], A301
- rat model of chronic hypoxia [Rothstein, Cao], A612
- regional, effect of diltiazem on, in presence of gradual coronary constriction in dog [Goldberg, Diederichs, Sear, Ryder, Foex], A637
- regional, effects of bunazosin on, in ischemic canine heart [Kono, Morita, Hayashi, Sato], A616
- regional, effects of hemodilution and anesthesia on, of compromised myocardium [Leone, Spahn, McRae, Smith], A596
- right heart, accurate assessment of, in acute respiratory failure [Her, Lees], A264
- right heart failure and prostaglandin E1 after heart transplantation [Sorbara, Pittarello, Bonato, Gallucci, Giron], A223
- right ventricular, during orthotopic liver transplantation [De Wolf, Gasior, Begliomini, Kang, Pinsky], A97
- right ventricular, during orthotopic liver transplantation with or without bypass [Soilleux, Gillon, Descorps-Declere, Barthe, Ecoffey], A493
- right ventricular, effects of urapidil on [Lepage, Pinaud, De Dieuleveult, Malinovsky, Souron], A125
- right ventricular end-systolic pressure volume relationship during norepinephrine infusion in septic shock patients [Martin, Saux, Eon, Auffray, Gouin], A136
- right ventricular wall motion following cardiopulmonary bypass [Rafferty, Durkin, Eleftheriades, Hines, O'Connor], A158
- systolic pressure variation may unmask acute left ventricular ischemic dysfunction upon weaning from cardiopulmonary bypass [Perel, Koman, Geva, Smolinsky], A137
- tachycardia increases extent of right ventricular necrosis following right coronary artery occlusion and reperfusion [Johnston, Vinten-Johansen, Tammasi], A639
- TAPSE can be reproducibly quantified by transesophageal echocardiography [Durkin, Rafferty], A468
- transesophageal Doppler mitral flow indices and ventricular relaxation [Hillel, Thys], A116
- tumor necrosis factor injected in vivo causes ex vivo left atrial dysfunction in guinea pigs [Heard, Perkins, Fink], A266
- two-dimensional echocardiographic determination of right ventricular maximum minor axis dimension fractional shortening [Durkin, Rafferty], A542
- nifedipine**
- intranasal, hemodynamic effects and disposition of, for post-CABG hypertension [Boylan, Qureshi, Laganieri, McGilveray, Hassard, O'Leary, Teasdale], A292
- myocardial depression induced by magnesium and, in isolated perfused rat heart [Payne, Roper, Spielman, Carter, Mueller, Thorp], A945
- nitroglycerin**
- coronary microvessel segmental resistances during vasodilation by isoflurane, adenosine and, in dogs [Conzen, Habazettl, Christ, Baier, Vollmar, Goetz, Brendel, Peter], A613
- inotropic effects of nitroprusside, trimethaphan and, on isolated rabbit myocardium [Lee, Virtusio, Lin, Wu], A629
- nitroprusside**
- inotropic effects of nitroglycerin, trimethaphan and, on isolated rabbit myocardium [Lee, Virtusio, Lin, Wu], A629
- oxygen consumption**
- myocardial  $O_2$  supply/demand relations during phenylephrine-induced pressor responses [Crystal, Mahdi, Salem, Kim], A550
- pacemaker**
- transesophageal atrial pacing for intraoperative bradycardia: pacing thresholds with modified esophageal stethoscope in adults [Pattison, Mathews, Entress, Altee], A138
- pharmacology**
- flunarizine pretreatment prevents myocardial stunning [Boutros, Mattheussen, Van Aken, Flameng], A573
- pulse rate**
- changes in variability of, correlate with decreases in blood pressure [Latson, Martin, Whitten, Hyndman, Elmore], A1207
- comparison of the ability of esmolol and alfentanil to attenuate tachycardia and hypertension during emergence from inhalational anesthesia [Ewell, Fuhrman, Pippin, Weaver], A108
- dependent effects of volatile anesthetics on cardiac sarcoplasmic reticulum [Winguth, Roewer, Hunerbein, Rumberger, Schulte am Esch], A658
- effects of ropivacaine, bupivacaine, and lidocaine upon isolated spontaneously beating rabbit heart [Feldman, Pitkanen, Arthur, Manning, Covino], A844
- hemodynamic response to induction of intravenous anesthesia supplemented with pentamorphone or fentanyl [Varlotta, Robertson], A56
- is dobutamine less chronotropic than epinephrine after coronary bypass surgery? [Butterworth, Prielipp, Zaloga, Royster, Robertie], A61
- naloxone potentiates inotropic but not chronotropic effects of isoproterenol in vitro [Lechner], A587
- sufentanil reduces all components of, variability [Latson, Martin, Whitten, Klein, Elmore], A373
- tachycardia increases extent of right ventricular necrosis following right coronary artery occlusion and reperfusion [Johnston, Vinten-Johansen, Tammasi], A639
- resuscitation**
- brain bioenergetics during, [Eleff, Schleien, Koehler, Shaffner, Eberle, Tsitlik, Halperin, Rogers, Traystman], A701
- effects of three modes of abdominal compression on vital organ blood flow in piglet CPR model [Eberle, Schleien, Shaffner, Koehler, Traystman], A300
- sinoatrial node**
- effects of halothane and epinephrine on automaticity of dominant

- and subsidiary atrial pacemakers [Bosnjak, Polic, Laszlo, Kampine, Atlee], A576
- trimethaphan**  
inotropic effects of nitroglycerin, nitroprusside and, on isolated rabbit myocardium [Lee, Virtusio, Lin, Wu], A629
- ventricles**  
accurate assessment of right heart function in acute respiratory failure [Her, Lees], A264  
coronary bypass graft flow vasodilation induced by isoflurane has only negligible effects on left ventricular systolic function [Leclerc, Fratacci, Dupuy, Payen], A147  
correlation between left-ventricular end-diastolic volume and PWCP [Glance, Keefe, Carlon], A499  
direct and indirect effects of ketamine on mammalian ventricular myocardium [Cook, Caron, Housmans], A617  
do changes in myocardial wall-thickening fractions reflect changes in global functions? [Williams, Brooks, Chelly, Sweeney, Hanley, Rabinovitz, Hartley], A162  
effect of diltiazem on regional left ventricular function in presence of gradual coronary constriction in dog [Goldberg, Diedrichs, Sear, Ryder, Foex], A637  
effects of urapidil on right ventricular function [Lepage, Pinaud, De Dieuleveult, Malinovsky, Souron], A125  
etomidate modifies hemodynamic response to high dose fentanyl induction in patients with poor left ventricular function: randomized study [Schlumberger, Ceddaha, Raffin, Dubois, Fischler], A152  
left ventricular ejection fraction and compliance in patients with cardiorespiratory failure with and without septic shock [Kuss, Hannemann, Bayer, Steingässer, Reinhart], A291  
left ventricular systolic thickening velocity, not fraction, is an index of myocardial function [Dupuy, Boisson, Schurando, Ti-bourtime, Payen], A131  
negative inotropic effects of propofol vs. thiopental: assessment in isolated ventricular septum model [Lin, Lee, Lee, Virtusio, Wu], A564  
right heart failure and prostaglandin E1 after heart transplantation [Sorbara, Pittarello, Bonato, Gallucci, Giron], A223  
right ventricular end-systolic pressure volume relationship during norepinephrine infusion in septic shock patients [Martin, Saux, Eon, Auffray, Gouin], A136  
right ventricular function during orthotopic liver transplantation [De Wolf, Gasior, Begliomini, Kang, Pinsky], A97  
right ventricular function during orthotopic liver transplantation with or without bypass [Soilleux, Gillon, Descorps-Declere, Barthe, Ecoffey], A493  
right ventricular wall motion following cardiopulmonary bypass [Rafferty, Durkin, Eleftheriades, Hines, O'Connor], A158  
systolic pressure variation may unmask acute left ventricular ischemic dysfunction upon weaning from cardiopulmonary bypass [Perel, Koman, Geva, Smolinsky], A137  
TAPSE can be reproducibly quantified by transesophageal echocardiography [Durkin, Rafferty], A468  
transesophageal Doppler mitral flow indices and ventricular relaxation [Hillel, Thys], A116  
two-dimensional echocardiographic determination of right ventricular maximum minor axis dimension fractional shortening [Durkin, Rafferty], A542
- Heating. See under Temperature**
- Helium. See under Gases, nonanesthetic**
- Hemodilution. See under Blood**
- Hemoglobin. See under Blood**
- Hemorrhage**  
effect of anesthetics injected into vertebral artery before and after pericardial tamponade and [Liao], A402
- heparin management protocol for cardiopulmonary bypass does not influence postoperative bleeding [Gravlee, Rogers, Dudas, Whitaker, Case], A114
- intrathecal clonidine and response to, [Eisenach], A758
- pediatric model, small volume hypertonic NaCl resuscitation in, [Ramamoorthy, Rooney, Wat, Kalatheevitil, Mathru, Rao], A1111
- routine application of high-dose aprotinin in open-heart surgery: study on 1,784 patients [Dietrich, Hähnel, Richter], A146
- shed mediastinal blood and 2,3-diphosphoglycerate after cardiac surgery [Isetta, Samat, Masseyeff, Kotaiche, Jourdan], A128
- shock, resuscitation fluids for treatment of, in dogs: effects on myocardial blood flow [Larson, Tait], A633
- shock, trauma plus, reduction of hypoperfusion and prevention of EEG changes in, using a kappa opiate antagonist [DeWitt, Whitley Prough], A698
- shock model, effect of hypertonic saline resuscitation on myocardial performance in,; assessment by pressure-volume loops [Mathru, Rooney, Vengurlekar, Hirsch, Rao], A635
- tranexamic acid, not desmopressin or both, decreases bleeding after open heart surgery [Horrow, Van Riper, Parmet, Strong, Brodsky, Osborne], A63
- Heparin. See under Blood**
- Hepatic toxicity. See under Toxicity**
- High frequency ventilation. See under Ventilation**
- Hippocampus. See under Brain**
- Histamine**  
**cimetidine**  
effect of H<sub>2</sub> antagonists on gastric volume and pH [Hass, Pablo, Brian, Olsen], A29  
oral effervescent, in daycase anesthesia: effects on gastric pH and volume [Narchi, Edouard, Bourget, Cattaneo, Peiti, Benhamou], A6  
differential effects of amrinone on pulmonary responses to, [Grayson, Tobias, Hirshman], A1166
- famotidine**  
effects of, on gastric acidity and volume in ambulatory surgery patients [Kao, Schaub, Tellez], A47  
oral, efficacy of different dosages of, in comparison to ranitidine for aspiration prophylaxis [Talke, Solanki], A1075
- ranitidine**  
antiemetic action of, in outpatient laparoscopy under propofol-isoflurane anesthesia [Kraynack, Bates], A14  
efficacy of different dosages of oral famotidine in comparison to, for aspiration prophylaxis [Talke, Solanki], A1075  
reduction of nausea and vomiting after thiopental-isoflurane anesthesia [Kraynack, Bates], A42  
role of dose and time effect study for prophylaxis of perioperative acid aspiration [Vinik, Covarrubias], A13
- Hormones**  
**adrenal**  
metabolic and endocrine responses to general anesthesia and surgery in diabetic patient [Lugrin, Raucoules, Ichai, Pham Hung, Grimaud], A248
- antidiuretic**  
vasopressin constricts peripheral but dilates cerebral arteries [Tong, Eisenach], A551
- corticosteroid**  
hormonal therapy in human brain-dead potential organ donors: comparative study [Mariot, Jacob, Voltz, Perrier, Strub], A246  
metabolic and endocrine responses to general anesthesia and surgery in diabetic patient [Lugrin, Raucoules, Ichai, Pham Hung, Grimaud], A248

# estrogen

increase in cardiac sensitivity to bupivacaine induced by [Moller, Datta, Covino], A953

# glucagon

metabolic and endocrine responses to general anesthesia and surgery in diabetic patient [Lugrin, Raucoules, Ichai, Pham Hung, Grimaud], A248

# glucocorticoids

methylprednisolone prevents propranolol-induced increases in airway responsiveness in basenji-greyhound dogs [Sauder, Tobias], A1158

# growth

metabolic and endocrine responses to general anesthesia and surgery in diabetic patient [Lugrin, Raucoules, Ichai, Pham Hung, Grimaud], A248

# insulin

therapy, influence of types of diabetes mellitus and, on metabolic and endocrine parameters during anesthesia and surgery [Raucoules, Ichai, Ghariani, Philip, Dolisi, Grimaud], A249

# parathyroid

effects of hyperparathyroidism on vecuronium-induced neuromuscular blockade [Roland, Roupie, Wierda, Sarfati, Villers, Dubost, Eruin], A901

# progesterone

cerebral hemodynamic response to [Schwalbe, Lu, Marx, Gibson, Goldiner], A938

# prostaglandins

E<sub>1</sub>, clinical evaluation of administration of, during cesarean section [Aoki, Watanabe, Fukushima, Mori, Kobayashi], A997

E<sub>1</sub>, nitroprusside and pulmonary blood flow distribution during one lung ventilation in dog [Heerdts], A599

effect of, on gastric secretion in humans during anesthesia [Mashimo, Takashina, Uchiyama, Seto, Yoshiya], A182

effect of, on skin blood flow and thermoregulation during enflurane anesthesia [Takashina, Kamada, Sasaki, Mashimo, Yoshiya], A59

effects of fluid balance and, on reimplantation pulmonary edema in heart-lung transplant recipient [Norgaard, McGlinch, Di-ikel, Estrin], A1189

effects of ibuprofen on endotoxin-induced inhibition of pulmonary pressor response to hypoxia in dogs [Ishibe, Shiokawa, Umeda, Izumi, Nakamura, Suekane], A1169

failure of A21-aminosteroid to improve postischemic myocardial function of isolated rat heart [Pretto], A301

importance of, in calcium chelator-induced bronchospasm [Downey, Lindeman, Hirshman], A1197

influence of SKF96148 on vasoconstrictor responses in pulmonary vascular system of cat [Nossaman, Abraham, Kadowitz], A280

interleukin 1 levels during and after normothermic cardiopulmonary bypass [Mazer, Freedman, Hayward], A155

levels of, phospholipase A<sub>2</sub> activity and, during cardiac surgery [Nakamura, Philbin, Peterson, deBros, Bonentre], A118

mechanism of thromboxane-induced pulmonary edema [Wak-erlin, Pearl], A1165

metabolic and eicosanoid profiles in hepatic ischemia-anoxic and reperfusion injury [Pretto, Evans], A738

microdialysis measurements of arachidonic acid metabolites in rat Cal hippocampus during transient cerebral ischemia [Benveniste, Hüttemeier, Brothers, Su, Watkins], A715

postductal hypoxemia is associated with plasma eicosanoids in neonates with congenital diaphragmatic hernia [Nakayama, Evans, Motoyama], A1240

prostacyclin, assessment of efficacy of, in continuous hemofiltration using a new hemofilter permeability index [Journiois, Safran, Mauriat, Chanu, Castelain], A271

prostacyclin, heparin and, in predilutional hemofiltration [Legat, Steltzer, Hufnagl, Zekert, Zimpfer], A253

pulmonary vascular response to cyclooxygenase inhibition is abolished during halothane anesthesia [Nyhan, Chen, Fehr, Rock, Murray], A627

renal hemodynamics in functional renal failure following interleukin 2 in man [Mercatello, Haadj-Aïssa, Tognet, Al-laouchiche, Negrier, Pozet, Favrot, Moskovtchenko, Philip], A241

right heart failure and, after heart transplantation [Sorbara, Pittarello, Bonato, Gallucci, Giron], A223

# thyroid

function of, on ECMO [Schwartz, Fackler], A310

**Horner's syndrome.** *See under Sympathetic nervous system*

**Humidifiers.** *See under Equipment*

# Hyperbaria

hyperbaric nitrous oxide anesthesia in rats for MAC determination [Russell, Graybeal], A399

**Hypercarbia.** *See under Carbon dioxide*

**Hyperglycemia.** *See under Metabolism*

**Hypertension.** *See Blood Pressure; Complications*

# Hyperthermia

## malignant

altered hormone-sensitive lipase activity as defect in, [Fletcher, Tripolitis, Erwin, Conti, Rosenberg], A749

altered phospholipid content of triads from pig skeletal muscle [Millamn, D'Amico], A876

comparative effects of halothane on single skinned muscle fibers from normal patients and patients with, [Adnet, Britt, Scott, Frodis], A353

comparative effects of ryanodine-halothane on resting tension of muscle in normal patients and patients susceptible to, [Adnet, Britt, Frodis, Scott], A352

comparison of caffeine halothane contracture test with molecular genetics diagnosis of, [Allen, MacKenzie, Lahey, Crossan, Nolan, Mettler, Worton, MacLenan, Korneluk], A711

comparison of European and North American protocols for diagnosis of, with halothane [Rosenberg, Fletcher, Davidson, Conti, Huggins], A1220

does chronic verapamil treatment alter diagnostic skeletal muscle contracture tests? [Bendriss, Nelson, Varaghese, Chelly], A190

false positive diagnosis of susceptibility to, in control subjects using North American caffeine halothane contracture test [Larach, Landis], A1013

influence of calcium antagonist bay K8644 on mechanical responses of skeletal muscle from nonsusceptible patients and patients susceptible to, [Adnet, Krivosic-Horber, Adamantidis, Haudecoeur, Reyfort], A315

microheterogeneity of Ca<sup>2+</sup>ATPase in skeletal muscle from pigs with, [Mullikin-Kilpatrick, Ekenbarger, Welch, Townsend, Leonard], A696

nonrigid, positive in vitro halothane contracture test in pigs exhibiting [Fletcher, Huggins, Davidson, Conti, Rosenberg], A206

ryanodine binding in swine correlates with strain differences, not MH [Vita, Fletcher, Tripolitis, Conti, Rosenberg], A690

simulator [Schwid, O'Donnell], A1058

susceptibility to,; hormone sensitive lipase suggested as candidate gene [Levitt, McKusick, Shutack, Heiman-Patterson, Rosenberg, Fletcher], A700

# Hypnotics

## barbiturates

airway constriction induced by, in guinea pig trachea: structure-

- function relationship [Curry, Lenox, Mitzner, Hirshman], A1161
- attenuation of agonist affinity in cerebral arteries correlates with lipid solubility [Germann, Laher, Bevan], A339
- effect of secobarbital and halothane on cholinergic binding to neuronal nicotinic receptors [Dodson, Braswell], A699
- high concentrations of, can enhance neuronal injury in substrate-deprived cortical cell cultures [Giffard, Weiss, Choi], A693
- influence of anesthetics on bupivacaine toxicity in rats [Lina, Dauchot, Jezeski], A855
- pentobarbital increases cAMP accumulation in S49 cells independent of guanine nucleotide binding proteins [Gonzales, Molinoff], A670
- role of benzodiazepine receptor system in benzodiazepine-barbiturate anesthetic system [Kissin, Brown, Bradley Jr.], A723
- benzodiazepines**
- aging increases patient sensitivity to hypnotic effects of midazolam [Marty, Goodman, Smith, Jacobs, Reves], A395
- antinociceptive effect of intrathecal midazolam and fentanyl in sheep [Arkoosh, Norris], A1260
- benzodiazepine antagonist, RO-15-1788, antagonizes cardiovascular depressant effect of lorazepam [Nakazawa, Ohara, Taneyama, Unruh, Arakawa], A619
- complaints of sexual fantasies following benzodiazepine sedation in women [Dundee], A27
- does RO15-4513 act specifically, or functionally, to increase anesthetic requirement? [Pearce-Smith, Winter, Firestone], A407
- dose-related amnesic and sedative properties of intravenous midazolam [McClune, Pandit, Wright, Moore], A179
- effects of midazolam and flumazenil on coronary circulation and contractility of isolated rabbit heart [Samain, Baron, Mouren, Dreux, Soughir, Viars], A642
- halothane requirement in mice selectively bred for sensitivity and resistance to diazepam [McCrae, Gallaher, Winter, Firestone], A708
- involvement of spinal opioid receptors in midazolam-induced antinociception [Tejwani, Rattan, McDonald], A1270
- lorazepam uptake by different designs of membrane oxygenators [Rosen, Rosen, Leong], A474
- midazolam and flumazenil decrease vascular tone in isolated dog saphenous vein preparation [Glisson], A660
- neurotoxicity of intrathecal midazolam in rabbits [Malinovsky, Mussini, Cozian, Lepage, Pinaud], A677
- oral midazolam premedication: optimal timing and effect of atropine [Weldon, Watcha, White], A1243
- quantitative assessment of antinociceptive effects of midazolam, amitriptyline and carbamazepine alone and in combination with morphine in mice [Liao, Liu, Takemori], A753
- receptor system, role of, in benzodiazepine-barbiturate anesthetic system [Kissin, Brown, Bradley Jr.], A723
- spinal anesthesia and midazolam exert antagonistic effects on CO<sub>2</sub> response [Gauthier, Chung, Dyck, Romanelli, Chapman], A846
- uptake of lorazepam and midazolam by scimed membrane oxygenator [Rosen, Rosen, Leong], A474
- diazepam**
- halothane requirement in mice selectively bred for sensitivity and resistance to, [McCrae, Gallaher, Winter, Firestone], A708
- lorazepam**
- benzodiazepine antagonist, RO-15-1788, antagonizes cardiovascular depressant effect of, [Nakazawa, Ohara, Taneyama, Unruh, Arakawa], A619
- uptake of, by different designs of membrane oxygenators [Rosen, Rosen, Leong], A437
- uptake of midazolam and, by scimed membrane oxygenator [Rosen, Rosen, Leong], A474
- midazolam**
- antinociception induced by, involvement of spinal opioid receptors in [Tejwani, Rattan, McDonald], A1270
- antinociceptive effects of amitriptyline, carbamazepine and, alone and in combination with morphine, in mice, quantitative assessment of [Liao, Liu, Takemori], A753
- effects of flumazenil and, on coronary circulation and contractility of isolated rabbit heart [Samain, Baron, Mouren, Dreux, Soughir, Viars], A642
- flumazenil and, decrease vascular tone in isolated dog saphenous vein preparation [Glisson], A660
- hypnotic effects of, aging increases patient sensitivity to [Marty, Goodman, Smith, Jacobs, Reves], A395
- intrathecal, neurotoxicity of, in rabbits [Malinovsky, Mussini, Cozian, Lepage, Pinaud], A677
- intrathecal fentanyl and, antinociceptive effect of, in sheep [Arkoosh, Norris], A1260
- intravenous, dose-related amnesic and sedative properties of [McClune, Pandit, Wright, Moore], A179
- oral, premedication: optimal timing and effect of atropine [Weldon, Watcha, White], A1243
- role of benzodiazepine receptor system in benzodiazepine-barbiturate anesthetic system [Kissin, Brown, Bradley Jr.], A723
- spinal anesthesia and, exert antagonistic effects on CO<sub>2</sub> response [Gauthier, Chung, Dyck, Romanelli, Chapman], A846
- uptake of lorazepam and, by scimed membrane oxygenator [Rosen, Rosen, Leong], A474
- pentobarbital**
- increase of cAMP accumulation by, in S49 cells independent of guanine nucleotide binding proteins [Gonzales, Molinoff], A670
- influence of anesthetics on bupivacaine toxicity in rats [Lina, Dauchot, Jezeski], A855
- Hypocarbica. See under Carbon dioxide**
- Hypoglycemia. See under Metabolism**
- Hypotension. See under Blood pressure; Complications**
- Hypotensive anesthetic techniques. See under Anesthetic techniques**
- Hypothalamus. See under Brain**
- Hypothermia. See also under Anesthetic techniques**
- inadvertent**
- spontaneous post-anesthetic tremor triggered by [Sessler, Rubinstein], A173
- Hypoxia. See also under Brain**
- acetyl-salicylic acid reverses nitroglycerin-induced fall in PaO<sub>2</sub> in anesthetized obese patients [In-nami, Takasaki, Kawaguchi, Okada], A1179
- alveolar, increases plasma endothelin-1 level in conscious rats [Shirakami, Magaribuchi, Saito, Nalao, Mori], A615
- chronic, rat model of [Rothstein, Cao], A612
- effect of isoflurane and cardiac output on hypoxic pulmonary vasoconstriction [Chen], A1171
- effects of vasoactive agents, volume and, on estimation of left atrial pressure in pigs [Gunning, Paulsen], A655
- endothelial cells are not required for HPV response in isolated pulmonary arteries [Marshall, Marshall], A1141
- evaluation of CSF concentrations of glutamate during spinal cord ischemia [Amory, Jasaitis, Nicklas, Zeevalk], A691
- excitotoxins, hypoglycemia, calcium, magnesium and, neuronal damage and [Rigor, West, Schurr], A666
- hypoxemia does not inhibit cardiac mitochondrial enzymes [Rothstein, Cao], A643
- incidence of hypoxemic events during anesthesia in children with upper respiratory infection [Rolf, Cote], A1124

influence of vascular pressure on hypoxic pulmonary vasoconstriction [Marshall, Kim, Marshall], A1139  
ischemia-mediated metabolic alterations produce activation of corneal A-delta and C fibers [MacIver, Tanelian], A667  
magnesium to protect against spinal cord ischemia [Amory, Jasaitis, Wright], A732  
metabolic and eicosanoid profiles in hepatic ischemia-anoxic and reperfusion injury [Pretto, Evans], A738  
monitoring with pulse oximetry during anesthesia and in recovery room: is incidence degree and duration of, reduced? [Moller, Iversen, Jensen, Johannessen, Espersen], A1089  
placental metabolism during [Grant, Arismendy, Ramanathan, Turndorf], A731  
postductal hypoxemia is associated with plasma eicosanoids in neonates with congenital diaphragmatic hernia [Nakayama, Evans, Motoyama], A1240  
predicting hypoxemia during one-lung ventilation [Slinger, Suissa, Adam, Triolet], A1170  
pulmonary macro- and microhemodynamics during normoxic and hypoxic ventilation [Goetz, Leipfinger, Kuhnle, Conzen, Peter, Brendel], A585  
pulmonary pressor response to, effects of ibuprofen on endotoxin-induced inhibition of, in dogs [Ishibe, Shiokawa, Umeda, Izumi, Nakamura, Suekane], A1169  
slow injection of midazolam does not reduce risk of [Teller, Alexander, Gross], A1251  
stimulus for hypoxic pulmonary vasoconstriction in dogs [Marshall, Clarke, Costarino, Chen, Miller, Marshall], A1138  
sustained, effects of nitrous oxide on ventilatory response to, in man [Dahan, Ward], A1168  
toxicity vs. protection by halothane during: relationship to glutathione [Johnson, Van Dyke], A365

I

**Ibuprofen.** *See under Analgesics*

**Immune response**

cellular, effects of catecholamines and blood transfusion on, following trauma [Eustache, Lees, Petit, Godier, Oksenhendler, Winckler], A226  
clinical and, in AIDS patients receiving LCT-based parenteral nutrition [Singer, Rubinstein, Rothkopf, Kirvelä, Kvetan, Askanazi], A293  
evidence for immunological effects of catecholamines after cardiac surgery [Eustache, Lees, Deghmani, Petit, Oksenhendler, Winckler], A1202  
immunological and hormonal, to lung surgery during one-lung ventilation [Tønnesen, Hähndorf, Brinklov, Andersen, Bendtzen], A1174  
production and detection of volatile anesthetic-associated neoantigens in vitro [Brown, Hastings, Gandolfi], A350  
virus-specific, to influenza infection, altered by halothane in mice [Tait, Davidson, Johnson, Remick, Knight], A340

**Inadvertent hypothermia.** *See under Hypothermia*

**Indocyanine green.** *See under Pharmacology*

**Induction.** *See also under Anesthetic techniques*  
**anesthesia**

choice of agent affects discharge time following ambulatory surgery in children, A21  
comparison of methods of preoxygenation and denitrogenation [Chekan, Weber, Wickas], A442  
cricoid pressure prevents gaseous distention of stomach during manual inflation of lungs in infants [Feld, Archer, Kreitzman, Brock-Utne], A1090  
desflurane vs. isoflurane: intubating conditions and related he-

modynamic response [Azad, Bartkowski, Witkowski, Marr, Lessin, Seltzer], A327

determinants of ventricular performance during, on heart transplant recipients [Dikel, Gruber, Watkins, Estrin], A107

does choice of anesthetic have effect on myocardial ischemia intubation and? [Leung, Levenson, Hollenberg], A99

effect of preinduction alfentanil on blood pressure and heart rate on laryngoscopy [Joseph, Assil], A49

evaluation of adolescents' preference and perception of [Cohen, Atkins, Hannallah], A1121

hemodynamic stability and thiopental, ketamine, thiopental/fentanyl and ketamine/fentanyl [Katz, Alexander], A324

preoxygenation in elderly: how long a period? [McCarthy, Mirakhor, McLoughlin, Elliott], A1007

propofol allows intubation without relaxants [Kallar], A22

rapid sequence induction, effect of, on lower leg fascial compartment pressure [Varlotta, Beckenstein, DiPasquale, Doyle], A908

respiratory complications and hypoxic episodes during, with isoflurane in children: effect of technique [Warde, Nagi, Rafferty], A1119

**Infection.** *See also under Complications*

**acquired immune deficiency syndrome**

clinical and immune responses in patients receiving LCT-based parenteral nutrition [Singer, Rubinstein, Rothkopf, Kirvelä, Kvetan, Askanazi], A293

**antimicrobial therapy and the anesthesiologist [Cheng], A1043**

**bacteremia**

complement moderation of cardiopulmonary response to, in sheep [Dehring, Traber, Traber, Arens], A232

is viral myocarditis an asymptomatic disease? [Roizen, Apfelbaum, Coalson, Rupani, Finn, Roberts, Lichtor, Schreider], A1038

**septicemia**

adrenal neuropeptide concentrations in endotoxic shock [Werner, Murray, Lunn, Stoddard, Go, Rorie], A231

can serum TNF open therapeutically relevant diagnostic "window" in septic patients? [Hammerle, Krafft, Winternitz, Weinstabl, Plattner], A244

effects of combined treatment with norepinephrine and dopexamine in human septic shock [Slomka, Nouira, Vaxelaire, Brunet, Dhainaut], A141

effects of endotoxin and TNF $\alpha$  on pulmonary vascular resistance [Johnson, Hurst, Mayers], A545

left ventricular ejection fraction and compliance in patients with cardiorespiratory failure with and without septic shock [Kuss, Hannemann, Bayer, Steingässer, Reinhart], A291

microvascular permeability in liver during endotoxin shock [Sigurdsson, Youssef, Christenson, Owunwanne], A262

neuropeptides: plasma levels in endotoxic shock [Werner, Murray, Lunn, Stoddard, Go, Rorie], A311

relationship between tissue oxygenation and plasma adenosine during sepsis [Bardenheuer, Forst, Haller, Peter], A222

right ventricular end-systolic pressure volume relationship during norepinephrine infusion in septic shock patients [Martin, Saux, Eon, Auffray, Gouin], A136

septic shock: goal-directed therapy [Martin, Eon, Saux, Akinin, Gouin], A219

topical nitroglycerin in treatment of purpura fulminans [Irazuzta, McManus], A307

total parenteral nutrition increases mortality following methotrexate-induced endogenous sepsis [Zaloga, Prielipp, Ward], A1232

tumor necrosis factor injected in vivo causes ex vivo left atrial dysfunction in guinea pigs [Heard, Perkins, Fink], A266

**Infrared spectroscopy.** *See under Measurement techniques*

**Infusion systems.** *See under Equipment*

**Inhalation.** *See under Anesthetic techniques*

**Inotropism.** *See under Heart*

**Insulin.** *See under Hormones*

**Interactions (drug)**

- cross-tolerance and synergy between intrathecal tizanidine and morphine [Lubenow, McCarthy, Penn, Ivankovich], A1261
- hemodynamic, of epinephrine with specific bradycardic agent UL-FS 49 [Lasker, Hillel, Benjamin, Shiang], A593
- inhibition of human liver alfentanil metabolism by medetomidine stereoisomers [Kharasch, Hill, Eddy], A379
- midazolam for coinduction of thiopental anesthesia in patients [Vinik, Bradley Jr., Kissin], A1216
- pipecuronium-antibiotic, study of [Stanley, Mirakhur, Clarke], A898
- quantitative assessment of antinociceptive effects of midazolam, amitriptyline and carbamazepine alone and in combination with morphine in mice [Liao, Liu, Takemori], A753
- role of benzodiazepine receptor system in benzodiazepine-barbiturate anesthetic system [Kissin, Brown, Bradley Jr.], A723
- vecuronium-propofol, study of [McCarthy, Pandit, McLoughlin, Mirakhur, Clarke], A899

**Intercostal anesthesia.** *See under Anesthetic techniques*

**Intermittent positive pressure breathing.** *See under Ventilation*

**Intestine.** *See under Gastrointestinal tract*

**Intracranial pressure.** *See under Brain*

**Intraocular pressure.** *See under Eyes*

**Intravenous anesthesia.** *See under Anesthetic techniques*

**Intravenous anesthetics.** *See Anesthetics, intravenous*

**Intravenous equipment.** *See under Equipment*

**Intubation, tracheal.** *See also under Complications*

**complications**

- auscultation at sternal notch does not distinguish between endotracheal and esophageal intubation [Mizutani, Ozaki, Benumof, Scheller], A448
- capsaicin and pulmonary effects of endotracheal intubation [Hogman, Hua, Dueck, Yaksh], A1185
- consequences of prolonged endotracheal intubation on swallowing reflex [de Larminat, Dureuil, Montravers, Amous, Desmonts], A1223
- difficult intubation: incidence and predictability: a prospective study on 8284 adult patients [Deller, Schreiber, Gramer, Aahnefeld], A1054
- incidence of failed intubation in obstetrics: is there an irreducible minimum? [Glasenberg Vaisrub, Albright], A1062
- incidence of maxillary sinusitis in recently intubated critically ill patients [Gosgnach, Ghedira, Xiang, Rouby, Nicolas, Zouaoui, Marceau, Viars], A1224
- risk factors associated with difficult airway in normotensive parturients [Dupont, Hamza, Jullien, Narchi], A999
- esmolol attenuates increase in intraocular pressure during laryngoscopy and intubation [Badrinath, Braverman, Ivankovich], A382
- intraocular pressure changes after tracheal intubation in children [Watcha, White, Chu, Stevens], A1096
- is pregnancy-induced hypertension a risk factor for difficult intubation? [Dupont, Jamza, Jullien, Narchi], A985

**technique**

- awake nasotracheal intubation, comparison of [Abou-Madi, Trop, Falkenstein], A288
- difficult intubation: incidence and predictability: a prospective study on 8284 adult patients [Deller, Schreiber, Gramer, Aahnefeld], A1054
- difficult intubations, bubble inclinometer for prediction of, a simple, inexpensive device [Roberts, Ali, Shroten], A1035
- difficult intubations, laryngeal indices caliper for prediction of, [Roberts, Ali, Shorten], A1011

- effects of 3 intubating doses of ORG9426 in humans [Lapeyre, Dubois, Lea, Kataria, Tran], A906
- emergency intubation, clinical utility of colorimetric end-tidal carbon dioxide detector in [Varon, Morrina, Civetta], A413
- endotracheal and esophageal intubation, auscultation at sternal notch does not distinguish between [Mizutani, Ozaki, Benumof, Scheller], A448
- evaluation of esophageal detector device [Kolesar, Ananthanarayan, Kapala], A417
- evaluation of Tessalon perles for topical oro-pharyngeal anesthesia [Mongan, Culling], A810
- risk factors associated with difficult airway in normotensive parturients [Dupont, Hamza, Jullien, Narchi], A999
- why cervical flexion facilitates laryngoscopy with a Macintosh laryngoscope, but hinders it with a flexible fiberoptic [Roberts, Ali, Shorten, Gorbach], A1012

**training**

- assessment of medical student confidence in recognizing position of endotracheal tube position after intubation [O'Flaherty, Adams], A1032

**Ions**

**calcium**

- administration of, during liver transplantation: influence of sampling method used for measurement of [Just, Delva, Camus, Lienhart], A297
- antagonist, regional intravenous injection of, in treatment of Raynaud's syndrome and reflex sympathetic dystrophy [Kawanishi, Hosoda, Kurokawa, Enomoto, Shimada], A809
- antagonist bay K8644, influence of, on mechanical responses of skeletal muscle from nonsusceptible patients and patients susceptible to malignant hyperthermia [Adnet, Krivosic-Horber, Adamantidis, Haudecoeur, Reyfort], A315
- chelator-induced bronchospasm, importance of prostaglandins in [Downey, Lindeman, Hirshman], A1197
- does chronic verapamil treatment alter malignant hyperthermia diagnostic skeletal muscle contracture tests? [Bendriss, Nelson, Varaghese, Chelly], A190
- effect of diltiazem on regional left ventricular function in presence of gradual coronary constriction in dog [Goldberg, Diedrichs, Sear, Ryder, Foex], A637
- effects of hypocapnic alkalosis on vasodilating action of nicardipine [Combes, Fauvage, Hubert, Guerret, Girardet], A145
- endothelin-stimulated release of, regulation of, from intracellular stores in vascular smooth muscle cells by isoproterenol [Xuan, Whorton, Watkins], A717
- excitotoxins, hypoxia, hypoglycemia, magnesium, and, and neuronal damage [Rigor, West, Schurr], A666
- flunarizine pretreatment prevents myocardial stunning [Boutros, Mattheussen, Van Aken, Flameng], A573
- halothane, isoflurane and transients of, in cultured vascular smooth muscle cells [Iaizzo, Sill, Olsen, Powis, Van Dyke], A344
- halothane decreases ionic fluxes due to metabolic inhibition, hypothermia or ischemia in atrial muscle strips [Eckenhoff], A644
- hemodynamic effects and disposition of intranasal nifedipine for post-CABG hypertension [Boylan, Qureshi, Laganieri, McGilveray, Hassard, O'Leary, Teasdale], A292
- impaired mobilization of, in children undergoing cardiopulmonary bypass [Robertie, Butterworth IV, Dudas, Ward, Zaloga], A1137
- interaction of nicardipine and hypocapnic alkalosis on cerebral vasomotricity and intracranial pressure [Durand, Combes, Girardet], A196
- intracellular, elevation of, halothane enhances tonic GABA<sub>A</sub>-me-

- diated neuronal inhibition by [Mody, MacIver, Tanelian], A668
- intracellular fluxes of, modulation of, in oxidant-injured endothelial cells by halothane and isoflurane [Shayevitz, Varani, Knight], A341
- ionized, relation of acid base status to, during pediatric liver transplant [Goldman, Vazquez, Jara, Polo, Cruz], A234
- isradipine for treatment of hypertension during abdominal surgery [Dartayet, Edouard, Samii], A142
- isradipine reverses coronary constrictor effects of dexmedetomidine [Flacke, Flacke, de Lange, Lawrence, Prinzen], A608
- microheterogeneity of, in skeletal muscle from pigs with malignant hyperthermia [Mullikin- Kilpatrick, Ekenbarger, Welch, Townsend, Leonard], A696
- myocardial intracellular "overload" of, is cause of arrhythmia during hypokalemia [Albrecht, Hansen, Miletich], A636
- oligodendroglial cell death occurs in absence of, in deenergization model of hypoxia and periventricular leukomalacia [Jurkowitz-Alexander, Horrocks, Simmons, Hohl, Altschuld, McDonald], A743
- propofol decreases voltage activated currents of, in rabbit heart myocytes [Wegrzynowicz, Matsuda, Volk, Shibata, Wachtel], A592
- chloride**
- enhancement of gaba-activated conductance of, in cultured rat hippocampal neurons by enflurane [Jones, Brooks, Harrison], A710
- volatile anesthetics gate a novel conductance of, in cultured postnatal rat hippocampal neurons [Yang, Zorumski], A714
- magnesium**
- does magnesium sulfate alter maternal cardiovascular response to vasopressor agents in gravid ewes? [Sipes, Chestnut, Vincent, Weiner], A969
- does magnesium sulfate worsen maternal hypotension during epidural anesthesia in gravid ewes? [Vincent, Chestnut, Sipes, Thompson, DeBruyn, Bleuer], A926
- effect of magnesium sulfate on hemodynamics and reflex sympathetic vasoconstriction [Liao, Iijima, Palahniuk], A942
- excitotoxins, hypoxia, hypoglycemia, calcium, and, and neuronal damage [Rigor, West, Schurr], A666
- inhibition of  $\alpha$ 1-adrenergic actions of epinephrine by, in postoperative coronary artery bypass graft patients [Prielipp, Zaloga, Butterworth, Robertie, Royster], A282
- inhibition of platelet activating factor release by magnesium sulfate in guinea pig alveolar macrophages [Tapia, Hursh, Karth], A740
- myocardial depression induced by, nifedipine and, in isolated perfused rat heart [Payne, Roper, Spielman, Carter, Mueller, Thorp], A945
- to protect against spinal cord ischemia [Amory, Jasaitis, Wright], A732
- potassium**
- effects of hypothermia and variations of, on maximum diastolic potential [Laszlo, Sprung, Polic, Kampine, Bosnjak], A263
- halothane decreases ionic fluxes due to metabolic inhibition, hypothermia or ischemia in atrial muscle strips [Eckenhoff], A644
- intracerebroventricular channel agonists do not decrease MAC in rats [Zucker, Calkins], A676
- L-644,711 decreases focal cerebral ischemic injury [Cole, Kohut, Kimelberg, Ghazal, Osborne], A733
- myocardial intracellular  $\text{Ca}^{++}$  "overload" is cause of arrhythmia during hypokalemia [Albrecht, Hansen, Miletich], A636
- thiopental attenuates anoxia-induced concentration changes in Na and, in rat hippocampal slice [Abramowicz, Kass, Cottrell], A685

- sodium**
- acute hypotension immediately following rapid hypertonic saline infusion in anesthetized dogs [Kien, Kramer, White], A571
- dilutional hyponatremia associated with glycine irrigation in intrauterine endoscopic surgery [Maroun, Zayneh, Bryssine, Bouletreau], A1051
- halothane decreases ionic fluxes due to metabolic inhibition, hypothermia or ischemia in atrial muscle strips [Eckenhoff], A644
- hyponatremia in TURP patient: does IV fluid choice make a difference? [Landry, Schwartz, Cope], A1029
- L-644,711 decreases focal cerebral ischemic injury [Cole, Kohut, Kimelberg, Ghazal, Osborne], A733
- preferential inhibition of impulses in C-fibers of rabbit vagus nerve by veratridine, an activator of sodium channels [Schneider, Datta, Strichartz], A790
- small volume hypertonic  $\text{NaCl}$  resuscitation in pediatric hemorrhage model [Ramamoorthy, Rooney, Wat, Kalatheevitil, Mathru, Rao], A1111
- thiopental attenuates anoxia-induced concentration changes in K and, in rat hippocampal slice [Abramowicz, Kass, Cottrell], A685
- Ischemia. See under Heart**
- Isoflurane. See under Anesthetics, volatile**
- Isoproterenol. See under Sympathetic nervous system**
- Isradipine. See under Heart; Pharmacology**

## J

- Jugular vein. See under Veins**

## K

- Ketamine. See under Anesthetics, intravenous**
- Kidney**
- blood flow**
- dissociation between renal hemodynamic and functional effects of titrated doses of dopamine in human kidney transplant [Jacob, Villiers, Boudaoud, Pruna, Payen, Teillac, Idatte, Eruin], A224
- effects of inferior vena cava clamping on renal perfusion pressure during pediatric liver transplantation [Belani, Estrin], A1134
- enflurane preservation of [Jarnberg, Marrone, Priano], A572
- epinephrine vs. phenylephrine: effects on renal autoregulation during epidural hypotensive anesthesia [Zayas, Sharrock, Blumenfeld, McDonald, Sealey], A70
- nifedipine but not enalapril prevents renal hemodynamic alteration during infrarenal aortic cross-clamping [Colson, Gouin, Marty-Ane, Mary, Roquefeuil], A95
- renal hemodynamics during liver transplantation utilizing venovenous bypass [Gunning, Brown, Swygert, Paulsen, Gonwa, Ramsay], A304
- renal hemodynamics in functional renal failure following interleukin 2 in man [Mercatello, Haadj-Aissa, Tognet, Al-laouchiche, Negrier, Pozet, Favrot, Moskovtchenko, Philip], A241
- dose requirements and plasma levels of pipecuronium during renal exclusion and orthotopic liver transplantation in pigs [Pittet, Tassonyi, Schopfer, Morel, Mentha, Le Coultre, Benakis], A883
- failure**
- acute, reduced morbidity in, with high amino acid regimen [Singer, Bursztajn, Segal, Kvetan, Askanazi], A260
- hemodynamic and oxygenation changes with continuous venovenous hemodialysis [Gerard, Patel, Mohr, Johnson], A267

- intensive care unit outcome of patients receiving chronic hemodialysis [Corwin, Gettinger, Brochu], A294
- metabolism of atracurium in patients with [Schwarz, Lackner, Hrska, Weindlmayr-Goettel, Tüchy, Steinbereithner], A917
- filtration**
- epinephrine vs. phenylephrine: effects on renal autoregulation during epidural hypotensive anesthesia [Zayas, Sharrock, Blumenfeld, McDonald, Sealey], A70
- function**
- following cyclosporine and enflurane [Fish, Rice, Peterson], A361
- intracoronary infusion of ATP attenuates renal sympathetic nerve activity mediated by ventricular baroreceptors [Taneyama, Nakazawa, Goto, Benson], A686
- nitrendipine and superoxide dismutase reduce ischemic renal injury [Schell, Jacobsen, Matsumura, Cole, Stewart], A1231
- pharmacodynamics of vecuronium in patients with and without renal failure [Peschaud, Kienlen, Rey, Marres, Momas, d'Athis, de Cailar], A916
- glomerular function**
- epinephrine vs. phenylephrine: effects on renal autoregulation during epidural hypotensive anesthesia [Zayas, Sharrock, Blumenfeld, McDonald, Sealey], A70
- metabolism**
- nitrendipine and superoxide dismutase reduce ischemic renal injury [Schell, Jacobsen, Matsumura, Cole, Stewart], A1231
- uremia**
- methyguanidine increases evoked release of acetylcholine from rat brain [Ohta, Nitta, Vizi, Nagashima, Foldes], A684
- L**
- Labetalol.** *See under* Sympathetic nervous system
- Lasers.** *See under* Equipment
- Leukocytes.** *See under* Blood
- Lidocaine.** *See under* Anesthetics, local; Toxicity
- Lipid.** *See under* Metabolism
- Lipid solubility.** *See under* Theories of anesthetic action
- Liver**
- blood flow**
- does severe normovolemic hemodilution adversely affect splanchnic oxygenation? [Noldge, Priebe, Buttler, Muller, Armbruster, Geiger], A609
- effect of propofol on [Diedericks, Sear, Foex], A624
- effects of dobutamine on oxygen balance and, during anesthesia of liver surgery [Kainuma, Nonami, Kimura, Nakashima, Shimada], A66
- effects of isoflurane on splanchnic oxygenation during normovolemic hemodilution [Noldge, Priebe, Schmidt, Kopp, Geiger], A546
- effects of sevoflurane, isoflurane and halothane on oxygenation and, in chronically instrumented greyhound dogs [Frink, Morgan, Coetzee, Scipione, Brown], A558
- to splanchnic organs and tissue oxygenation of liver and pancreas during enflurane-induced hypotension [Vollmar, Kerner, Vierl, Conzen, Habazettl, Waldner, Peter, Brendel], A614
- systemic and hepatic hemodynamics associated with fulminant hepatic failure [Gunning, Paulsen, Brajtford], A305
- disease**
- cerebral blood flow and cerebral swelling in fulminant hepatic failure [Aggarwall, Yonas, Kang, Martin, Kramer, Obrist, Darby], A211
- systemic and hepatic hemodynamics associated with fulminant hepatic failure [Gunning, Paulsen, Brajtford], A305
- function**
- cerebral blood flow and cerebral swelling in fulminant hepatic failure [Aggarwall, Yonas, Kang, Martin, Kramer, Obrist, Darby], A211
- effect of volatile anesthetics on albumin synthesis and secretion in guinea pig liver slices [Ghantous, Fernando, Hastings, Gandolfi, Brendel], A359
- pharmacokinetic model characterizing antipyrine disposition from moment of its administration [Shanks, Henthron, Kaczynski, Asada, Krejcie, Avram], A377
- isoflurane partially protects energy balance in isolated hepatocytes during in vitro anoxia [Pathak, Becker, Reilly, Hanson, Landers], A336
- is whole body oxygen uptake a good indicator of liver allograft function? [Albaladejo, Jugan, Descorps-Declere], A443
- metabolic and eicosanoid profiles in hepatic ischemia-anoxic and reperfusion injury [Pretto, Evans], A738
- metabolism**
- effects of propofol on mitochondrial oxidative phosphorylation in rat liver [Bendriss, Nelson, Dabadie, Mazat], A687
- microvascular permeability in liver during endotoxin shock [Sigurdsson, Youssef, Christenson, Owunwanne], A262
- orthotopic transplantation, cerebral perfusion pressure during, for liver acute failure [Albaladejo, Jugan, Daibes, Orloff, Ecoffey], A289
- orthotopic transplantation, continuous monitoring of mixed venous oxygen saturation during, [Jugan, Albaladejo, Descorps Declere, Jayais, Ecoffey], A494
- orthotopic transplantation, dose requirements and plasma levels of pipercuronium during renal exclusion and, in pigs [Pittet, Tassonyi, Schopfer, Morel, Mentha, Le Coultre, Benakis], A883
- orthotopic transplantation, forced air warming minimizes hypothermia during [Kelley, Csete, Prager, Sessler, Roberts, Ascher], A433
- orthotopic transplantation, right ventricular function during [De Wolf, Gasior, Begliomini, Kang, Pinsky], A97
- orthotopic transplantation, right ventricular function during, with or without bypass [Soilleux, Gillon, Descorps-Declere, Barthe, Ecoffey], A493
- orthotopic transplantation, vecuronium or atracurium for? [O'Kelly, Jayais, Veroli, Lhuissier, Ecoffey], A905
- oxygen consumption**
- blood flow to splanchnic organs and tissue oxygenation of liver and pancreas during enflurane-induced hypotension [Vollmar, Kerner, Vierl, Conzen, Habazettl, Waldner, Peter, Brendel], A614
- does severe normovolemic hemodilution adversely affect splanchnic oxygenation? [Noldge, Priebe, Buttler, Muller, Armbruster, Geiger], A609
- effects of dobutamine on hepatic blood flow and oxygen balance during anesthesia of liver surgery [Kainuma, Nonami, Kimura, Nakashima, Shimada], A66
- effects of propofol on mitochondrial oxidative phosphorylation in rat liver [Bendriss, Nelson, Dabadie, Mazat], A687
- hepatic O<sub>2</sub> regulation during endotoxemia [Schlichtig, Klions], A1188
- oxygen saturation of hepatic vein reflects changes in hepatic energy charge in rats [Nakashima, Kainuma, Kimura, Kurokawa, Shimada], A429
- perioperative decrease in hepatic venous oxygen saturation affects serum transaminases after liver surgery [Kainuma, Kimura, Nakashima, Shimada], A428
- pediatric transplantation, effects of inferior vena cava clamping on renal perfusion pressure during [Belani, Estrin], A1134
- pediatric transplantation, relation of acid base status to ionized calcium during [Goldman, Vazquez, Jara, Polo, Cruz], A234



- transplantation, adjustment of ventilation to control acidosis without sodium bicarbonate during [Just, Delva, Camus, Lienhart], A296
- transplantation, calcium administration during: influence of sampling method used for  $\text{Ca}^{++}$  measurement [Just, Delva, Camus, Lienhart], A297
- transplantation, continuous monitoring of total body oxygen consumption during, in adult patients [Dieterich, Forst, Groh, Denecke, Peter], A488
- transplantation, increases in arterial oxygen tension during [Gunning, Ramsay, Paulsen], A278
- transplantation, indication of venous bypass according to preliminary test of hepatic vascular exclusion during, in adults [Delva, Just, Camus, Hannoun, Parc, Lienhart], A295
- transplantation, relationship of blood sugar and oxygen consumption heralds graft dysfunction after [Steltzer, Hiesmayr, Tuechy, Zimpher], A235
- transplantation, renal hemodynamics during, utilizing veno-venous bypass [Gunning, Brown, Swygert, Paulsen, Gonwa, Ramsay], A304
- trifluoroacetylated proteins in livers of rats treated with potential chlorofluorocarbon replacement [Martin, Harris, Anders, Pohl], A348
- Local anesthetics.** *See* Anesthetics, local; *See also under* Toxicity
- Lorazepam.** *See under* Hypnotics
- Lumbar sympathetic block.** *See under* Anesthetic techniques
- Lung**
  - anticonvulsant and pulmonary effect of endotracheally-administered midazolam in a model of status epilepticus [Rothenberg, Jones, Dainauskas, McCarthy], A233
- aspiration**
  - perioperative pulmonary: incidence and risk factors [Weber, Warner, Warner], A1017
- atelectasis**
  - pleural fluid and, examined by transesophageal echocardiography during coronary artery bypass grafting [Hong, Orihashi, Keehn, Sisto, Goldiner, Oka], A454
- bacteriologic assessment of lower respiratory tract using three sampling methods in ventilated patients [Papazian, Derbel, De Francia, Charrel, Gouin], A251
- bilateral single transplantation: anesthetic management and intraoperative considerations [Triantafyllou, Heerdt, Herbst, Pond, Despotis], A90
- blood flow**
  - alteration of pulmonary oxygenation by pulmonary artery occluded pressure measurements in intensive care patients [Ishizawa, Dohi], A250
  - effect of ketamine and halothane on splanchnic circulation in pig [Loick, Tokyay, Herndon], A607
  - effect of nitroglycerin infusion on effective pulmonary capillary pressure in postoperative period of major vascular surgery [Amardeil, Fargnoli, Peyrin, Girardet, Grimberty], A144
  - halothane anesthesia attenuates sympathetic adrenergic regulation of pulmonary circulation following hypotension and hypoperfusion [Murray, Fehr, Chen, Nyhan], A601
  - influence of halothane and fentanyl on time course of pulmonary redistribution of, during one lung ventilation [Heerdt, Blesios], A741
  - inversely related to pulmonary vascular resistance in patients with left ventricular assist device [Siegel, Ramasamy, Oyer, Greene, Portner], A101
  - PA catheter introducers: do component parts affect rate of? [Hyman, Smith, England, Naukam, Berman], A265
  - prostaglandin  $\text{E}_1$ , nitroprusside and pulmonary distribution of, during one lung ventilation in dog [Heerdt], A599

- bronchus**
  - effect of halothane on guinea pig and human bronchi [Zhou, Vann, Will], A1193
- compliance**
  - chest wall mechanics during propofol anesthesia [Fierobe, Cantineau, Pande, Desmonts], A1144
  - tidal volume measurement errors: impact of circuit humidifier and [Feldman, Muller], A469
- deadspace**
  - blood gas solubility and acinar anatomy joint influence on [Aukburg, Gobran, Neufeld, Scherer], A1155
- differential effects of amrinone on pulmonary responses to histamine [Grayson, Tobias, Hirshman], A1166
- diseases**
  - intraoperative  $\text{FIO}_2$  and development of mitomycin-induced postoperative interstitial pneumonitis [Desiderio, Alagesan, Fischer, Bedford, Rusch], A1177
  - is conventional ventilation adequate in COPD patients during single-lung transplantation? [Rogers, Sharp, Hantler, Calhoun, Erian], A1184
  - is coronary revascularization using internal mammary artery contraindicated in patients with COPD? [McCarthy, Tuman, Ivankovich], A1210
  - is pulseoximetry useful for preoperative screening of pulmonary disorders? [Weindler, Schaller, Pscheidl, Georgieff], A485
- edema**
  - intraoperative  $\text{FIO}_2$  and development of mitomycin-induced postoperative interstitial pneumonitis [Desiderio, Alagesan, Fischer, Bedford, Rusch], A1177
  - reimplantation, effects of fluid balance and prostaglandin  $\text{E}_1$  on, in heart-lung transplant recipient [Norgaard, McGlinch, Dikel, Estrin], A1189
  - thromboxane-induced, mechanism of [Wakerlin, Pearl], A1165
  - electron microscopic localization of antioxidant enzymes in rat lung [Coursin, Cihla, Bindley, Wallow, Oberley, Oberley], A1225
- function**
  - capsaicin and pulmonary effects of endotracheal intubation [Hogman, Hua, Dueck, Yaksh], A1185
  - changes in pulmonary function tests during high-dose lumbar epidural anesthesia [Urmey, McDonald], A1154
  - comparison of pulmonary function testing, arterial blood gas analysis and Roizen classification in predicting postoperative pulmonary complications in head and neck surgical patients [Reilley, Rao, Schuller], A286
  - pulmonary, best after cholecystectomy with intrapleural analgesia [Frenette, Boudreault, Guay], A829
  - pulmonary effects of preoperative extracorporeal membrane oxygenation in congenital diaphragmatic hernia [Nakayama, Motoyama, Smith, Tagge], A1241
  - right heart, accurate assessment of, in acute respiratory failure [Her, Lees], A264
- incidence of nosocomial bronchopulmonary infection in ventilated patients using standard means of prevention [Auftray, Papazian, Martin, Eon, Gouin], A221
- perioperative pulmonary complications in extremely obese patients: no major effect on outcome [Layne, Warner, Warner], A1073
- pulmonary artery**
  - alteration of pulmonary oxygenation by pulmonary artery occluded pressure measurements in intensive care patients [Ishizawa, Dohi], A250
  - effect of nitroglycerin infusion on effective pulmonary capillary pressure in postoperative period of major vascular surgery [Amardeil, Fargnoli, Peyrin, Girardet, Grimberty], A144

- endothelial cells are not required for HPV response in isolated pulmonary arteries [Marshall, Marshall], A1141
- PA catheter introducers: do component parts affect flow rate? [Hyman, Smith, England, Naukam, Berman], A265
- pentoxifylline inhibits hypoxia-induced pulmonary hypertension in pig [Toung, Aizawa, Grayson, Reily, Traystman], A273
- respiratory distress syndrome**
- accurate assessment of right heart function in acute respiratory failure [Her, Lees], A264
- almitrine-induced  $\text{PaO}_2$  increase persists in absence of pulmonary pressure increase [Plaisance, Mebazaa, Payen], A1150
- early clinical trials of intravenous oxygenator in [High, Snider, Campbell, Russell, Stene, Thieme], A270
- effects of prolonged almitrine intravenous infusion on gas exchange and hemodynamics in [Plaisance, Loriferne, Brun-Buisson, Lemaire], A1178
- fructose 1,6diphosphate in [Sommer, Carlon, Young], A1180
- intermittent mandatory pressure release ventilation in patients with acute respiratory failure [Vrillon, Rouby, Andreev, Jawish, Ameer, Viars], A255
- use of UHFJV in management of [Patel, Mohr, Mathews, Pincus, Gluck], A257
- respiratory resistance**
- effects of fentanyl on pulmonary resistive properties: an occlusion method study [Cohendy, Iracine, Rebiere, Calvet, Eledjam], A1148
- hypotension, flushing and bronchospasm in myelodysplasia patients [Holzman, Sethna, Sockin], A1123
- measurement of respiratory system elastance and, during conventional mechanical ventilation [Barnas, MacKenzie, Campbell, Mendham, Ho], A1157
- methylprednisolone prevents propranolol-induced increases in airway responsiveness in basenji-greyhound dogs [Sauder, Tobias], A1158
- shunting**
- amrinone increases venous admixture and decreases arterial oxygenation after coronary artery bypass graft surgery [Priest, Butterworth IV, Zaloga, Robertie, Royster], A1230
- does use of methymethacrylate cement induce hemodynamic or pulmonary instability? [Huffnagle, Torjman, Marr, Fenlin, Seltzer], A1021
- tidal volume**
- measurement errors: impact of lung compliance and a circuit humidifier [Feldman, Muller], A469
- transplantation, single and double, arterial to end-tidal carbon dioxide tension difference during [Raffin, Moutafis, Bonnette, Bisson, Fischler], A298
- vasculature**
- amrinone reduces elevated pulmonary vascular resistance in isolated, perfused rabbit lungs [Murray, Powers, Clarke], A1162
- bronchial artery oxygen tension influences pulmonary vascular tone [Marshall, Marshall, Magno, Lilagen, Pietra], A1140
- dose-dependent effect of dopamine on hypoxic pulmonary vasoconstriction in anesthetized sheep [Loick, Traber, Tokyay, Traber], A606
- effect of isoflurane and cardiac output on hypoxic pulmonary vasoconstriction [Chen], A1171
- effect of leukopenia on pulmonary hypertension following heparin-protamine in pigs [Habazettl, Conzen, Yekebas, Vollmar, Hobbhahn, Peter, Brendel], A646
- effects of endotoxin and TNF $\alpha$  on pulmonary vascular resistance [Johnson, Hurst, Mayers], A545
- effects of ibuprofen on endotoxin-induced inhibition of pulmonary pressor response to hypoxia in dogs [Ishibe, Shiokawa, Umeda, Izumi, Nakamura, Suekane], A1169
- effects of positive pressure ventilation on microhemodynamics in arteriolar networks of lung [Goetz, Kuhnle, Leipfinger, Groh, Kuebler, Peter, Brendel], A1156
- endothelial cells are not required for HPV response in isolated pulmonary arteries [Marshall, Marshall], A1141
- influence of SKF96148 on vasoconstrictor responses in pulmonary vascular system of cat [Nossaman, Abraham, Kadowitz], A280
- influence of vascular pressure on hypoxic pulmonary vasoconstriction [Marshall, Kim, Marshall], A1139
- pentoxifylline inhibits hypoxia-induced pulmonary hypertension in pig [Toung, Aizawa, Grayson, Reily, Traystman], A273
- pulmonary capillary pressure changes following smoke inhalation in sheep [Isago, Traber, Herndon, Traber], A1234
- pulmonary macro- and microhemodynamics during normoxic and hypoxic ventilation [Goetz, Leipfinger, Kuhnle, Conzen, Peter, Brendel], A585
- pulmonary vascular response to cyclooxygenase inhibition is abolished during halothane anesthesia [Nyhan, Chen, Fehr, Rock, Murray], A627
- stimulus for Hypoxic pulmonary vasoconstriction in dogs [Marshall, Clarke, Costarino, Chen, Miller, Marshall], A1138
- vasoreactivity in isolated perfused human lungs [Pearl, Stinson, Starnes, Murad], A1164
- volume**
- epidural analgesia prevents loss of lung volume [Buckley, MacIntosh], A764
- tidal volume measurement errors: impact of lung compliance and a circuit humidifier [Feldman, Muller], A469

## M

**MAC.** *See under* Potency, anesthetic

**Macrophage.** *See under* Brain

**Magnesium.** *See under* Ions

**Malignant hyperthermia.** *See under* Hyperthermia

**Mass spectroscopy.** *See under* Measurement techniques

**Maxillofacial surgery.** *See under* Surgery

**Measurement techniques.** *See also* Equipment; Monitoring

a "band-aid" to detect alcohol levels in blood [Roizen, Lichtor, Lane], A512

**anesthetics**

effect of ethanol vapor on detection of inhalational anesthetics using infrared and piezoelectric monitors [Crawford, Volgyesi, Carmichael, Creighton, Lerman], A522

evaluation of two newly developed anesthetic agent monitors: BRÜEL and KJ $^{\circ}$  anesthetic agent monitor 1304 and datex capnomac ULTIMA [Nielsen, Kann, Moller], A538

technology implementation and performance in anesthetic gas analysis [Wallen], A508

are formulas for estimating body surface area valid? [Moss, Wang, Thisted], A1037

**blood flow**

cerebral, comparison of curve analysis methodology for  $^{133}\text{Xe}$ , during CPB [Wuill, Croughwell, Lu, Newmann, Greeley, Reves], A718

cerebral, validation of xenon clearance as measure of [Quill, Spahn, Lu, Kern, Greeley, McRae, Reves, Leone], A597

**blood pressure**

comparison of direct arterial and finapres [Bardoczky, Levarlet, Engelman, Schmartz, D'Hollander], A489

do radial artery pressure waveforms reflect myocardial performance? [Pauca, Wallenhaupt, Kon], A60

improved automated noninvasive monitoring in infants [Siker, Proctor], A1130

systolic, variation in postoperative ventilated patients: a sensitive

- indicator of low preload states [Vrillon, LeBret, Vrints, Barre, Coriat, Viars], A243
- cardiac output**
- clinical correlation of noninvasive measurement of, and thermodilution technique among surgical intensive care patients [Silverstein, Welkowitz, Qi, Cui, Abalos, Leibowitz, Iberti], A524
  - comparison of, from continuous transtracheal Doppler with standardized thermodilution [Peper, Biervliet, de Jong, Kloek, van Hardevelt], A530
  - comparison of, measured by transtracheal Doppler and thermodilution in anesthetized patients [Saeki, Namba, Nakayama, Tokioka, Morita, Kosaka], A511
  - continuous measurement in ICU patients [Yelderman, Ramsay, Quinn, Paulsen, McKown], A421
  - continuous transtracheal Doppler determination of, in pediatric patients: correlation with transthoracic continuous wave Doppler, [Newman, Sanders, McCurnin, Martin, Morrow], A1126
  - end-tidal PCO<sub>2</sub> reflects changes of [Shibutani, Komatsu, Kashiwagi, Bairamian, Kumar], A506
  - noninvasive continuous estimate of, derived from Finapres wave form [Gratz, Kraidin, deCastro, Jacobi, Spagna], A475
  - pulse contour, a new method for measurement of [Stern, Donovan, Hines], A455
  - pulse contour analysis derived determination of, comparison with thermodilution in ICU setting [Tannenbaum, Mathews, Weissman], A422
  - pulse contour continuous, when does vascular compliance change? [Mulier, Vandermeersch, Van Aken], A509
  - simultaneous measurements by transtracheal Doppler, electromagnetic flow probe and thermodilution during various hemodynamic states in pigs [Gregoretti, Henderson, Bradley Jr.], A533
  - transesophageal Doppler determination of, impact of ejection time in suprasternal calibration upon accuracy of [Spahn, Schmid, Tornic], A517
  - transesophageal Doppler determination of, in critical care patients [Glance, Keefe, Carlon], A501
  - transesophageal echocardiography vs. thermodilution [Troianos, Savino, Weiss], A62
- detection of ST segment abnormalities using artificial neural networks [Navabi, Hameroff, Watt, Mylrea], A436
- dipyridamole thallium scan is not accurate in detecting coronary stenosis in patients undergoing abdominal aortic surgery [Bertrand, Coriat, Baron, Barre, Thomas, Viars], A86
- Doppler**
- assessment of collateral circulation in hand of patients undergoing major cardiovascular surgery: modified Allen Test and use of pulse oximetry vs. Doppler ultrasound [Raffin, Michel-Cherqui, Ambros, Saint-Marc, de Tovar], A1066
  - comparison of cardiac output from continuous transtracheal Doppler with standardized thermodilution [Peper, Biervliet, de Jong, Kloek, van Hardevelt], A530
  - comparison of cardiac outputs measured by transtracheal Doppler and thermodilution in anesthetized patients [Saeki, Namba, Nakayama, Tokioka, Morita, Kosaka], A511
  - continuous transtracheal Doppler cardiac output determination in pediatric patients: correlation with transthoracic continuous wave Doppler cardiac output [Newman, Sanders, McCurnin, Martin, Morrow], A1126
  - impact of ejection time in suprasternal calibration upon accuracy of transesophageal Doppler cardiac output determination [Spahn, Schmid, Tornic], A517
  - intracranial air embolism is detected by transcranial Doppler during cardiopulmonary bypass procedures [Albin, Hantler, Bunegin, Grover, Cohen, Mitzel], A458
  - simultaneous cardiac output measurements by transtracheal Doppler, electromagnetic flow probe and thermodilution during various hemodynamic states in pigs [Gregoretti, Henderson, Bradley Jr.], A533
  - transesophageal Doppler cardiac output determination in critical care patients [Glance, Keefe, Carlon], A501
- electrical**
- impedance as an early marker for myocardial ischemia [Romanelli, Howie, Hartzler, Liu, Kern, McSweeney], A482
- electrocardiography**
- comparison of cold pressor stress test with computerized 22 site ECG/ST mapping system and dipyridamole stress thallium scanning for determining significant coronary artery disease [Seegobin, Wilmschurst, Morrels, Cleloe], A119
- gas tensions**
- breath by breath gas exchange measurement during general anesthesia [Beatty, Beech, Healy], A487
  - evaluation of a continuous blood gas monitor in patients [Larson, Divers, Riccitelli], A500
  - side-by-side comparison of blood gas controls using four different blood gas analyzers [MacGregor, Scuderi, Harris, Bowton, Brockschmidt], A423
- impedance**
- as early marker for myocardial ischemia [Romanelli, Howie, Hartzler, Liu, Kern, McSweeney], A482
- infrared**
- evaluation of brain oxygenation during cardiopulmonary bypass and total circulatory arrest in children by near infrared spectroscopy [Bracey, Greeley, Greibel, Kern, Ungerleider, Reves, Piantadosi], A110
- intraoperative echocardiography**
- in children with congenital cardiac shunt lesions: comparison of transesophageal and epicardial echocardiography [Muhiudeen, Roberson, Silverman, Turley, Haas, Corver, Cahalan], A103
  - in infants and children with regurgitant valvar lesions: comparison of TEE and epicardial echocardiography [Muhiudeen, Roberson, Silverman, Turley, Haas, Corver, Cahalan], A104
- is thromboelastograph a clinically useful predictor of blood loss after bypass?** [Van Riper, Horrow, Osborne], A1206
- is thromboelastography useful for evaluation of coagulopathies in high-risk parturients?** [Campbell, Nahrwold], A993
- limited predictive value of dipyridamole thallium imaging in non-cardiac surgery patients** [Fleisher, Hawes, Rosenbaum], A75
- lower esophageal contractility monitoring prolongs recovery after outpatient anesthesia** [Zahl, Shapiro, Sampson, Mingus, Prasad, Silvey], A40
- mass spectroscopy**
- detection and quantification of mixed volatile anesthetics by Poet II and [Jameson], A441
- neuromuscular blockade**
- consistency of accelerographic train-of-four ratios at varying currents [Brull, Connelly, O'Connor, Silverman], A867
  - effect of tetanus on subsequent tetanic fade [Silverman, Connelly, O'Connor, Brull], A865
  - is Relaxograph a reliable pediatric monitor of neuromuscular transmission? [Werner], A913
  - methods-comparison study of acceleration, EMG and force responses during recovery from non-depolarizing block in children [Werner], A912
  - nondepolarizing, double burst stimulation assessment of [Jones, Lennon, Stensrud, Weber, Joyner], A879
  - nondepolarizing, double burst stimulation assessment of, com-

- parison with 50 Hz tetany [Anderson, Jones, Stensrud, Lennon], A880
- optimal electrode site on hand for evoked EMG monitoring [Kalli], A911
- single twitch accelographic responses at submaximal and supra-maximal currents [Brull, Connelly, O'Connor, Silverman], A866
- succinylcholine-induced fasciculations: correlation to loss of twitch response at different stimulating frequencies [Brull, Connelly, Silverman], A868
- visual assessment of fade with low intensity stimulating current [Brull, Connelly, Sutherland, Silverman], A864
- nuclear magnetic resonance**
- relationship between fatigue and metabolism of diaphragm using NMR spectroscopy in vivo [Nichols, Buck, Eleff, Shungu, Koehler, Traystman], A1190
- total intravenous anesthesia with propofol and without intubation for magnetic resonance imaging in pediatric patients [Vangerven, Wouters, Vandermeersch, Van Aken], A1239
- oximeters**
- assessment of collateral circulation in hand of patients undergoing major cardiovascular surgery: modified Allen Test and use of pulse oximetry vs. Doppler ultrasound [Raffin, Michel-Cherqui, Ambros, Saint-Marc, de Tovar], A1066
- automated recording of pulse oximetry [Pan, Gravenstein], A503
- clinical accuracy of new modular mixed-venous saturation oximeter [Gettinger, Brochu, Mroz, Wager], A238
- clinical evaluation of Monitron cardiorespiratory monitor: minimizing false alarms [Rung, Bennett], A523
- clinical evaluation of three mixed-venous oxygen saturation catheters [Scuderi, Bowton, Meredith, Harris, Brockschmidt], A484
- CO-Hb in 1000 smokers and nonsmokers: biological half life of CO-Hb, and consequences of pulseoximetry [Deller, Forstner, Stenz, Schreiber, Fösel], A507
- continuous monitoring of mixed venous oxygen saturation during orthotopic liver transplantation [Jugan, Albaladejo, Descorps Declere, Jayais, Ecoffey], A494
- detection of anesthesia machine leaks with nitrogen, end-tidal CO<sub>2</sub>, PACO<sub>2</sub> and pulse oximetry during spontaneous ventilation in anesthetized dogs [Jameson, Popic], A1031
- effect of pulse oximetry, age and ASA physical status on severity of anesthesia complications: an outcome analysis [Cullen, Nemeskal, Cooper, Zaslavsky, Dwyer], A1249
- factors influencing SVO<sub>2</sub> in critically ill patients [Moutafis, Rouby, Kirstetter, Lherm, Dreux, Viars], A256
- failure rate of pulse oximetry in post-anesthesia care unit [Gillies, Overand, Bosse, Freund, Cheney], A1010
- feasibility of telemetric pulse oximetry monitoring on a postpartum ward [Pan, James], A543
- forehead reflectance pulse oximetry: time response to rapid saturation change [Barker, Hyatt, Long], A544
- initial clinical experience using in vivo optical spectroscopy to quantify brain oxygen saturation [Prough, Scuderi, Lewis, Stump, Goetting], A424
- is pulseoximetry useful for preoperative screening of pulmonary disorders? [Weindler, Schaller, Pscheidl, Georgieff], A485
- longterm-accuracy of continuous fiberoptic SVO<sub>2</sub> monitoring [Boeden, Spies, Zaune, Gabriel, Martin], A495
- mixed venous oximetry in cardiac surgical patients [Hanson, III, Geer], A438
- monitoring with pulse oximetry during anesthesia and in recovery room: is incidence degree and duration of hypoxemia reduced? [Moller, Iversen, Jensen, Johannessen, Espersen], A1089
- plethysmographic pulse oximetry: a teaching tool in lumbar sympathetic blockade [Ngeow, Shay, Neudachin], A1086
- post-cesarean oxygen saturation via telemetric pulse oximetry network [Pan, James], A943
- pulseless oximetry: next generation? [Volgyesi, Burrows, Bissonnette], A460
- pulse oximetry: reducing cost and improving quality of care with smart technology [Roizen, Schreider, Austin], A536
- simple device for testing pulse oximeters [Volgyesi, Kolesar, Lerman], A427
- single-blind study of combined pulse oximetry and capnography in children [Rolf, Cote, Liu, Gousouzian, Ryan], A1125
- phonocardiography**
- using a special endotracheal tube [Doyle, Teves], A497
- predictive value of preoperative silent ischemia for postoperative ischemic cardiac events in vascular and nonvascular surgery patients [Fleisher, Rosenbaum, Hawes, Barash], A76
- pulmonary artery**
- adequacy of Swan-Ganz catheter for calculation of pulmonary capillary pressure after arterial occlusion [Lenzi, Camporesi, Hakin], A1175
- carbon dioxide rebreathing during catheter insertion [Bowe, Muth, Payne, Hyman, Klein], A1080
- cardiac output is main factor of variation of mixed venous oxygen saturation during general anesthesia [Annat, Ravat, Viale, Pommier, Brudon], A1199
- clinical use of watch catheter [Robertie, Johnston, Williamson, Wallenhaupt, Ganz], A85
- clinical accuracy of new modular mixed-venous saturation oximeter [Gettinger, Brochu, Mroz, Wager], A238
- clinical correlation of noninvasive measurement of cardiac output and thermodilution technique among surgical intensive care patients [Silverstein, Welkowitz, Qi, Cui, Abalos, Leibowitz, Iberti], A524
- comparison of cardiac output from continuous transtracheal Doppler with standardized thermodilution [Peper, Biervliet, de Jong, Klock, van Hardevelt], A530
- comparison of cardiac outputs measured by transtracheal Doppler and thermodilution in anesthetized patients [Saeki, Namba, Nakayama, Tokioka, Morita, Kosaka], A511
- continuous monitoring of mixed venous oxygen saturation during orthotopic liver transplantation [Jugan, Albaladejo, Descorps Declere, Jayais, Ecoffey], A494
- continuous monitoring of mixed venous oxygen saturation during sitting neurosurgical procedures [Khoury, Cagny-Bellet, Tondriaux, Tchaoussoff, Ossart], A184
- correlation between left-ventricular end-diastolic volume and PWCP [Glance, Keefe, Carlon], A499
- factors influencing SVO<sub>2</sub> in critically ill patients [Moutafis, Rouby, Kirstetter, Lherm, Dreux, Viars], A256
- interatrial septal responses to transatrial pressure gradients and their potential for predicting pulmonary capillary wedge pressure [Kusumoto, Muhiudeen, Cahalan, Schiller], A149
- longterm-accuracy of continuous fiberoptic SVO<sub>2</sub> monitoring [Boeden, Spies, Zaune, Gabriel, Martin], A495
- mixed venous oximetry in cardiac surgical patients [Hanson, III, Geer], A438
- pulmonary capillary pressure measurement from occlusion pressure profile analysis [Wakerlin, Flavin, Siegel, Benson, Pearl], A1163
- simultaneous cardiac output measurements by transtracheal Doppler, electromagnetic flow probe and thermodilution during various hemodynamic states in pigs [Gregoretti, Henderson, Bradley Jr.], A533

**pulse monitors**

- automated recording of pulse oximetry [Pan, Gravenstein], A503
- clinical evaluation of Monitron cardiorespiratory monitor: minimizing false alarms [Rung, Bennett], A523
- detection of anesthesia machine leaks with nitrogen, end-tidal CO<sub>2</sub>, PACO<sub>2</sub> and pulse oximetry during spontaneous ventilation in anesthetized dogs [Jameson, Popic], A1031
- effect of intravenous epinephrine on heart rate as monitored with computerized tachometer [Huang], A762
- effect of pulse oximetry, age and ASA physical status on severity of anesthesia complications: an outcome analysis [Cullen, Nemeskal, Cooper, Zaslavsky, Dwyer], A1249
- failure rate of pulse oximetry in post-anesthesia care unit [Gillies, Overand, Bosse, Freund, Cheney], A1010
- feasibility of telemetric pulse oximetry monitoring on a postpartum ward [Pan, James], A543
- forehead reflectance pulse oximetry: time response to rapid saturation change [Barker, Hyatt, Long], A544
- pulse contour continuous cardiac output: when does vascular compliance change? [Mulier, Vandermeersch, Van Aken], A509
- pulse oximetry: reducing cost and improving quality of care with smart technology [Roizen, Schreider, Austin], A536

**regional**

- isoproterenol for test-dosing in pediatric regional blockade [Perillo, Sethna, Berde], A1127

**spectroscopy**

- continuous noninvasive assessment of brain oxygenation and blood volume during cardiopulmonary bypass in children undergoing ASD closure [Steven, Kurth, Nicolson, Phoon, Chance], A457
- near infrared, evaluation of brain oxygenation during cardiopulmonary bypass and total circulatory arrest in children by [Bracey, Greeley, Greibel, Kern, Ungerleider, Reves, Piantadosi], A1109
- optical, in vivo, initial clinical experience using, to quantify brain oxygen saturation [Prough, Scuderi, Lewis, Stump, Goetting], A424
- phase-modulation, influence of head circumference and probe configuration on optical pathlength of light through head as assessed by, in children [Steven, Kurth, Benaron, Chance], A471
- thromboelastographic evaluation of effect of cell saver blood on coagulation in post cardiopulmonary bypass patient [Weiss, McNulty, Schmitz], A83

**tomography**

- high resolution computer tomography to assess changes in airway resistance during anesthesia [Brown, Herold, Hirshman, Mitzner, Zerhouni], A1159

**ultrasound**

- cannulation of internal jugular vein guided by [Troianos, Jobes, Ellison], A451

**Mechanical ventilation.** *See under Ventilation*

**Medetomidine.** *See under Sympathetic nervous system*

**Mediastinoscopy.** *See under Surgery*

**Medical students.** *See under Education*

**Medicolegal**

- role of equipment failure and misuse in anesthetic-related malpractice claims [Vistica, Posner, Caplan, Cheney], A1008

**Meperidine.** *See under Analgesics*

**Mepivacaine.** *See under Anesthetics, local*

**Metabolic acidosis.** *See under Acid-base equilibrium*

**Metabolism.** *See also under individual organs; Muscle, skeletal; Nerves; Temperature*

**adenosine**

- plasma, relationship between tissue oxygenation and, during sepsis [Bardenheuer, Forst, Haller, Peter], A222
- systemic and cerebral, effect of acute aortic constriction on, in man [Bardenheuer, Pauli, Lauterjung, Cantjohanser, Martin, Peter], A166

**adenosine triphosphate**

- intravenous, attenuates surgical stress responses and reduces inhalation anesthetic requirements in humans [Fukunaga, Kaneko, Ichinohe, Igarashi, Nakakuki], A400
- determination of hyper- and hypometabolism in postoperative ICU patient [Weissman, Kemper], A306

**diabetes**

- cerebrovascular reactivity in diabetic rat [Pelligrino, Kipa, Albrecht], A748
- effect of insulin infusion on brain and blood glucose in hyperglycemic diabetic rats [Hofer, Lanier], A1272
- effect of N<sub>2</sub>O on vitamin B<sub>12</sub> and folate metabolism in patients [Koblin, Tomerson, Waldman, Lampe], A322
- influence of insulin therapy and types of, on metabolic and endocrine parameters during anesthesia and surgery [Raucoules, Ichai, Ghariani, Philip, Dolisi, Grimaud], A249
- metabolic and endocrine responses to general anesthesia and surgery in [Lugrin, Raucoules, Ichai, Pham Hung, Grimaud], A248
- sensitivity of aortic contraction to phenylephrine induced by, is time and endothelium dependent [Chang, Stevens, Lacy], A559

**fructose**

- in adult respiratory distress syndrome [Sommer, Carlon, Young], A1180

**glucose**

- blood levels, and current pediatric guidelines [Hongnat, Murat, Mathey, Saint-Maurice], A1092
- brain and blood, effect of insulin infusion on, in hyperglycemic diabetic rats [Hofer, Lanier], A1272
- lidocaine HCl increases uptake of, in cultured mouse fibroblasts [Hanley, Knutson], A730
- plasma concentrations, in anesthetized children during administration of lactated Ringer's and 5% dextrose in lactated Ringer's [Liu, McCann, Lum, Rivard], A1136
- glycerol as fuel substrate in multiple trauma [Singer, Bursztein, Elwyn, Kvetan, Askanazi], A261

**hyperglycemia**

- effect of insulin infusion on brain and blood glucose in hyperglycemic diabetic rats [Hofer, Lanier], A1272
- effects of, on seizure-induced brain damage in rat [Kofke, Barnada, Rudy], A216
- relationship of blood sugar and oxygen consumption heralds graft dysfunction after liver transplantation [Steltzer, Hiesmayr, Tuechy, Zimpfer], A235

**hypoglycemia**

- effects of hypocarbia and, on brain pH, ATP phosphocreatine, and blood flow by NMR spectroscopy [Derrer, Sieber, Koehler, Traystman, Saudek], A702
- isoflurane partially protects energy balance in isolated hepatocytes during in vitro anoxia [Pathak, Becker, Reilly, Hanson, Landers], A336

**lipid**

- tolerance and hyperlipemia during long-term sedation with propofol [Boyle, Shear, Whie, Schuller], A245

**oxygen consumption**

- changes in, during recovery from spinal and epidural anesthesia [Constant, Bonnet], A808

- continuous monitoring of, during liver transplantation in adult patients [Dieterich, Forst, Groh, Denecke, Peter], A488
- dobutamine and norepinephrine treatment in relation to oxygen delivery and, in endotoxin shock [Bakker, Vincent], A313
- effects of hematocrit on O<sub>2</sub> tissue extraction capabilities [Van der Linder, Engelman, Gilbert, Paques, Simon, Vincent], A640
- gas exchange during extreme hemodilution in humans [Mathru, Kleinman, Blakeman, Dries, Rao], A237
- indirect calorimetry: comparison of two methods in ventilated patients [Oschmann, Föhring, Schafer, Hannemann, Reinhart], A440
- influence of dobutamine on relationship between O<sub>2</sub> delivery and, during anesthesia and hemodilution [Janvier, Payen, Dardel, Mary], A159
- is whole body oxygen uptake a good indicator of liver allograft function? [Albaladejo, Jugan, Descorps-Declere], A443
- mass spectrometric measurement of oxygen uptake in postoperative period of major abdominal surgery: effect of clonidine [Quintin, Viale, Annat, Butin, Hoen, Cottet-Eymard, Motin], A252
- O<sub>2</sub> delivery and, under general anesthesia and hemodilution [Janvier, Guenard, Winnock, Vallet, Dugrais], A163
- oxygen supply dependency is not a clinically relevant finding in adequately resuscitated critically ill patients [Hannemann, Korell, Kuss, Reinhart], A242
- in postanesthesia shivering, localized radiant heat restoration of, to normal [Harkey, Gulden, Lipton, Giesecke], A535
- postoperative, effect of clonidine on, in humans: a double blind study [Goldfarb, Ang, Debaene, Chhim, Jolis], A317
- protamine induces adverse metabolic effects [Hantler, Wakefield, Wroblewski, Crider, Stanely], A112
- relationship between tissue oxygenation and plasma adenosine during sepsis [Bardenheuer, Forst, Haller, Peter], A222
- relationship of blood sugar and, heralds graft dysfunction after liver transplantation [Steltzer, Hiesmayr, Tuechy, Zimpfer], A235
- sevoflurane reduction of, more than isoflurane in pigs [DiNardo, Cork, Kern, Hilwig], A409
- protein**
- effect of volatile anesthetics on albumin synthesis and secretion in guinea pig liver slices [Ghantous, Fernando, Hastings, Gandolfi, Brendel], A359
- trifluoroacetylated, in livers of rats treated with potential chlorofluorocarbon replacement [Martin, Harris, Anders, Pohl], A348
- Methohexital.** *See under Anesthetics, intravenous*
- Methylguanidine.** *See under Antagonists, neuromuscular relaxants*
- Methylphenidate.** *See under Pharmacology*
- Metoclopramide.** *See under Pharmacology*
- Midazolam.** *See under Anesthetics, intravenous; Hypnotics*
- Milrinone.** *See under Pharmacology*
- Monitoring.** *See also Equipment; Measurement techniques; See also under Carbon dioxide; Oxygen; Temperature*
- an alternative parallel-computing approach to intelligent hemodynamic monitoring [Cohn, Rosenbaum, Miller], A541
- blood pressure**
- continuous non-invasive, to detect hypotension after regional anesthesia in obstetrics [Wilkin, Um, Block Jr., McDonald], A968
- new method for measurement of continuous cardiac output: pulse contour [Stern, Donovan, Hines], A455
- noninvasive, using neural networks [Baker, Orr, Westenskow], A446
- carbon dioxide**
- colorimetric end tidal CO<sub>2</sub> monitoring during interhospital transport of critically ill adult patients [Carli, Rozenberg, Bousquet, Lamour, Orliaguet], A426
- computer assisted CO<sub>2</sub> monitoring using "artificial neural networks" [Navabi, Watt, Hameroff, Mylrea], A435
- disposable end-tidal CO<sub>2</sub> detector: tidal volume threshold [Freid, Good, Bonett, Gravenstein], A464
- clinical evaluation of "private eye": a "heads-up" display of anesthesia data [Block Jr., Swan, Yablok, McDonald], A534
- computer management of quality assessment monitoring data [Scamman, Todd, Jadryev], A1039
- electrocardiography**
- improved MR imaging by ECT-triggered high-frequency ventilation [Groh, Welte, Seiderer, Staebler, Peter], A477
- perioperative changes in the QT interval in response to anesthetics and plasma catecholamines [Amar, Lazar, Gross, Shamoony, Frishman], A135
- evaluation of a portable coagulation monitor in cardiac surgical patients [Despotis, Poler, Heerdt, Lappas], A502
- oxygen**
- accuracy of arterial blood gas analysis of PO<sub>2</sub> compared to tonometered blood [Scuderi, MacGregor, Harris, Bowton, Brockschmidt], A492
- indirect calorimetry: comparison of two methods in ventilated patients [Oschmann, Föhring, Schafer, Hannemann, Reinhart], A440
- response time with smart alarms [Orr, Simon, Ing, Bender, Westenskow], A447
- smart anesthesia monitoring system [Pan, van der Aa, Gomez, van Oostrom, Beneken, Gravenstein], A450
- Morphine.** *See under Analgesics*
- Muscle, skeletal**
- acetylcholine receptors mediate masseter muscle rigidity [Storella, Keykhah], A871
- comparative pharmacology of succinylcholine on jaw, eye and tibialis muscle [Pryn, van der Spek], A859
- contractility**
- does chronic verapamil treatment alter malignant hyperthermia diagnostic tests? [Bendriss, Nelson, Varaghese, Chelly], A190
- effect of individual branched chain amino acids on fatigue and, of diaphragm [Yamada, Kvetan, Ohta, Chaudhry, Nagashima, Askanazi, Elwyn], A259
- increased muscle tone from high dose alfentanil is a peripheral effect [Huang], A351
- denervation**
- effects of upper limb dominance on sensitivity to succinylcholine [Abel, Eisenkraft], A893
- diaphragm**
- canine, body position and displacement of [Sprung, Rodarte], A1181
- contractility and fatigue of, effect of individual branched chain amino acids on [Yamada, Kvetan, Ohta, Chaudhry, Nagashima, Askanazi, Elwyn], A259
- contractility and fatigue of, effects of branched chain amino acids and glucose [Yamada, Ohta, Chaudhry, Nagashima, Askanazi, Elwyn, Kvetan], A1152
- contractility of, partial paralysis with atracurium induces segmental changes in [Goldman, Walsh, Grassino], A1182
- fatigue of, effect of branched chain amino acids on, in vitro [Yamada, Ohta, Chaudhry, Nagashima, Askanazi, Elwyn, Kvetan], A1151
- function of, canine, effects of interpleural bupivacaine on [Kowalski, Bradley, Greengrass, Freeman, Younes], A1191

- microcirculation of, effects of halothane and isoflurane on, in rats [Leon, Boczkowski, Dureuil, Aubier, Desmonts], A1142
- plasma concentration-response relationship of pancuronium for adductor pollicis and, in anesthetized man [Debaene, Guesde, Clergue, Lienhart], A887
- relationship between fatigue and metabolism of, using NMR spectroscopy in vivo [Nichols, Buck, Eleff, Shungu, Koehler, Traystman], A1190
- differential effects of midazolam on inspiratory muscles [Molliex, Dureuil, Desmonts], A1145
- fasciculation**
- succinylcholine-induced, phenytoin suppression of, dose-related response [Gordon, Abou-Madi, Trop, Falkenstein], A183
- metabolism**
- altered phospholipid content of triads from malignant hyperthermic pig skeletal muscle [Millamn, D'Amico], A876
- cytochemical localization of Ca-ATPase in human skeletal muscle [Hon, Landers, Platts], A678
- relationship between fatigue and, of diaphragm using NMR spectroscopy in vivo [Nichols, Buck, Eleff, Shungu, Koehler, Traystman], A1190
- ryanodine binding in swine correlates with strain differences, not malignant hyperthermia [Vita, Fletcher, Tripolitis, Conti, Rosenberg], A690
- nitrous oxide stimulates expiratory muscles in dogs [Warner, Joyner, Loeffler, Rehder], A1172
- sacroplasm**
- cytochemical localization of Ca-ATPase in human skeletal muscle [Hon, Landers, Platts], A678
- structure-activity-relationship difference between prejunctional and postjunctional nicotinic receptors [Baker, Guzzi, Ross, Lowndes], A915
- Myasthenia gravis. See under Complications**
- Myocardial function. See under Heart**

N

- Nalbuphine. See under Analgesics**
- Nalmefene. See under Antagonists, narcotic**
- Naloxonazine. See under Antagonists, narcotic**
- Naloxone. See under Antagonists, narcotic**
- Narcotic antagonist. See Antagonists, narcotic**
- Nausea. See under Vomiting**
- Neostigmine. See under Antagonists, neuromuscular relaxants**
- Nerve block. See under Anesthetic techniques, regional; Nerve**
- Nerve block**
- differential sensitivity of synaptic components to local anesthetics [Tabatabai, Booth], A789
- ophthalmic, effects of alfentanil analgesia for [Stead, Northfield], A769
- sciatic, analgesia for fractured tibia using [Roupie, Mahiou, Fraise, Jean, Pasteyer], A825
- sustained release of dibucaine from biodegradable polymer matrix: potential method for prolonged neural blockade [Berde, Masters, Dutta, Turek, Langer], A776
- effects of capsaicin on sciatic nerve sensory and motor function [Braverman, Kerns, Ivankovich], A752
- ischemia-mediated metabolic alterations produce activation of corneal A-delta and C fibers [MacIver, Tanelian], A667
- metabolism**
- excitotoxins, hypoxia, hypoglycemia, calcium, magnesium and neuronal damage [Rigor, West, Schurr], A666

- neuropathy**
- autonomic, and gastric volume in anesthetized patient [Cejudo, Kawas, Giesecke], A16
- Nerve stimulation, transcutaneous. See under Pain**
- Neurolept anesthesia. See under Anesthetic techniques**
- Neuromuscular blockade. See under Measurement techniques**
- Neuromuscular function**
- antibiotics**
- study of pipecuronium-antibiotic interaction [Stanley, Mirakhur, Clarke], A898
- does cyclosporin A potentiate effect of neuromuscular blocking agents in vitro? [Koller, Khuenl-Brady, Mair, Wieser], A900
- effects of thiopental and d-tubocurarine alone and combined at neuromuscular junction [Bhattacharyya, Sokoll, Davies, Zwagerman], A869
- recovery of respiratory muscle function in surgical outpatients [Stanec, Nuesa, Akturk, Pillon, Capek], A878
- synapsis**
- structure-activity-relationship difference between prejunctional and postjunctional nicotinic receptors [Baker, Guzzi, Ross, Lowndes], A915
- Neuromuscular relaxants. See also Antagonists, neuromuscular relaxants**
- atracurium**
- comparison of effects of desflurane and isoflurane on action of, in man [Smiley, Ornstein, Mathews, Matteo], A882
- computer-controlled infusion of [O'Hara, Derbyshire, Overdyk, Bogen, Marshall], A414
- cortical magnetic motor evoked potentials altered by [Sloan, Erian], A215
- desflurane potentiation of, in humans [Lee, Kwan, Chen, Tsai, Gyermek, Cheng, Cantley], A875
- frequency of residual neuromuscular blockade following: a multicenter randomized study [Jensen, Engbaek, Andersen, et al], A914
- metabolism of, in patients with renal failure [Schwarz, Lackner, Hrska, Weindlmayr-Goettel, Tüchy, Steinbereithner], A917
- for orthotopic liver transplantation? [O'Kelly, Jayais, Veroli, Lhuissier, Ecoffey], A905
- partial paralysis with, induces segmental changes in diaphragmatic contractility [Goldman, Walsh, Grassino], A1182
- pharmacokinetics of, during continuous infusion under fentanyl anesthesia [Beemer, Bjorksten, Crankshaw], A904
- reversal, age does not change dynamics of [Muravchick], A384
- sensitivity to, in myasthenia gravis patients during true remission [Abel, Eisenkraft], A892
- BW954U**
- pharmacology of [Fiamengo, Savarese, Chiscolm, Lien, Wastila], A863
- 3-desacetylvecuronium**
- pharmacokinetics, neuromuscular effects and biodisposition of, in cats [Segredo, Shin, Sharma, Gruenki, Caldwell, Khuenl-Brady, Agoston, Miller], A894
- GI-64**
- new rapidly acting nondepolarizing neuromuscular blocking agent [Gyermek, Nguyen, Lee], A862
- ORG9426**
- dose-response and recovery of, under enflurane anesthesia [Bartkowski, Witkowski, Azad, Epstein, Marr, Lessin], A902
- effects of 3 intubating doses of, in humans [Lapeyre, Dubois, Lea, Kataria, Tran], A906
- human dose response of, under isoflurane general anesthesia [Quill, Begin, Glass, Ginsberg, Gorbach], A910
- interaction of, and other nondepolarizing muscle relaxants in live

- rats [Watanabe, Ohta, Tejeda, Manabe, Nagashima, Foldes], A888
- muscular relaxation with, under balanced anesthesia [Nagashima, Nguyen, Mason, Schiller, Goldiner, Foldes], A890
- onset, duration and recovery from, in elderly [Fiset, Balendran, Bevan], A881
- single-dose response, onset, and duration with halothane anesthesia [Tullock, Wilks, Bandom, Diana, Cook], A877
- pancuronium**
- comparative neuromuscular blocking effect of pipecuronium and, under isoflurane  $N_2O/O_2$  anesthesia [Larijani, Gratz, Afshar, Jacobi, Minassian, Hughes, Scott, deCastro, Weinberger], A891
- desflurane potentiation of, comparison with isoflurane [Witkowski, Azad, Bartkowski, Wpstein, Marr, Lessin], A903
- desflurane vs. isoflurane: dose-response relationship of succinylcholine and [Caldwell, Magorian, Lynam, Segredo, Eger II, Miller], A860
- effect of mixture of vecuronium and, on heart rate during anesthesia for cardiac operations [Braubert], A909
- frequency of residual neuromuscular blockade following atracurium, vecuronium and: a multicenter randomized study [Jensen, Engbaek, Andersen, et al], A914
- interaction of ORG9426 and other nondepolarizing muscle relaxants in live rats [Watanabe, Ohta, Tejeda, Manabe, Nagashima, Foldes], A888
- plasma concentration-response relationship of, for diaphragm and adductor pollicis in anesthetized man [Debaene, Guesde, Clergue, Lienhart], A887
- priming dose of, does not attenuate chest wall rigidity from sufentanil [Abrams, Horrow, Storella, Van Riper, Lambson, Rawa], A148
- reversal of neuromuscular block induced by pipecuronium and, by edrophonium and pyridostigmine [Gyermek, Lee], A874
- pipecuronium**
- comparative neuromuscular blocking effect of pancuronium and, under isoflurane,  $N_2O/O_2$  anesthesia [Larijani, Gratz, Afshar, Jacobi, Minassian, Hughes, Scott, deCastro, Weinberger], A891
- dose requirements and plasma levels of, during renal exclusion and orthotopic liver transplantation in pigs [Pittet, Tassonyi, Schopfer, Morel, Mentha, Le Coultre, Benakis], A883
- effects of concentration of isoflurane on recovery of neuromuscular blockade by, following neostigmine administration [Meistelman, Plaud, Lira, Donati], A886
- interaction of ORG9426 and other nondepolarizing muscle relaxants in live rats [Watanabe, Ohta, Tejeda, Manabe, Nagashima, Foldes], A888
- reversal of neuromuscular block induced by pancuronium and, by edrophonium and pyridostigmine [Gyermek, Lee], A874
- study of pipecuronium-antibiotic interaction [Stanley, Mirakhur, Clarke], A898
- succinylcholine**
- actions in plasma from patients with and without burns [Storella, Hill], A870
- comparative pharmacology of, on jaw, eye and tibialis muscle [Pryn, van der Spek], A859
- desflurane vs. isoflurane: dose-response relationship of pancuronium and [Caldwell, Magorian, Lynam, Segredo, Eger II, Miller], A860
- effects of upper limb dominance on sensitivity to [Abel, Eisenkraft], A893
- fasciculations induced by: correlation to loss of twitch response at different stimulating frequencies [Brull, Connelly, Silverman], A868
- neuromuscular effects of, on vocal cords and adductor pollicis muscle [Meistelman, Plaud, Donati], A885
- neuromuscular pharmacology of, in ferret [Tsai, Gyermak, Lee, Nguyen], A873
- paraben preservatives do not cause increased ICP in cats [Pompy, Karlin, Capuano, Hartung, Cottrell], A1214
- phenytoin suppression of fasciculations induced by, a dose-related response [Gordon, Abou-Madi, Trop, Falkenstein], A183
- study of biochemical changes following administration of, in children with strabismus [McLoughlin, Mirakhur, Trimble, McCarthy, Elliott], A897
- d-tubocurarine**
- continuous infusion of, induces tolerance and increases in nicotinic acetylcholine receptors [Hogue Jr., Itani, Martyn], A1273
- effects of thiopental and, alone and combined at neuromuscular junction [Bhattacharyya, Sokoll, Davies, Zwagerman], A869
- interaction of ORG9426 and other nondepolarizing muscle relaxants in live rats [Watanabe, Ohta, Tejeda, Manabe, Nagashima, Foldes], A888
- motor nerve terminal effects of halothane potentiate curare-induced neuromuscular block [Sokoll, Bhattacharyya, Davies, Zwagerman], A872
- priming before vecuronium: curare vs. vecuronium [Butterworth, Ray, Dudas], A907
- reversal of, by combination of methylguanidine and neostigmine in vivo [Watanabe, Nagashima, Ohta, Foldes], A889
- utilization of muscle relaxants: a cost analysis [Brown, Lichtenthal], A1088
- vecuronium**
- alteration of cortical magnetic motor evoked potentials by [Sloan, Erian], A174
- atracurium or, for orthotopic liver transplantation? [O'Kelly, Jayais, Veroli, Lhuissier, Ecoffey], A905
- differential rate of recovery of neuromuscular function in adductor pollicis and flexor hallucis after [Brandom, Stiller, Cook, Scierka], A1113
- effect of mixture of pancuronium and, on heart rate during anesthesia for cardiac operations [Braubert], A909
- effects of, on flexor hallucis brevis compared with adductor pollicis in anesthetized children [Brandom, Georgiu, Cook], A1112
- effects of different dosages of atropine, mixed with a fixed dose of neostigmine, on reversal of neuromuscular blockade induced by [Baurain, Bernovoi, d'Hollander, Barvais], A896
- effects of hyperparathyroidism on neuromuscular blockade induced by [Roland, Roupie, Wierda, Sarfati, Villers, Dubost, Eruin], A901
- effects of isoflurane anesthesia residual levels on reversal of neuromuscular blockade induced by [Baurain, Melot, d'Hollander, Bernovoi, Barvasi], A895
- frequency of residual neuromuscular blockade following atracurium, pancuronium and, a multicenter randomized study [Jensen, Engbaek, Andersen, et al], A914
- high dose, pharmacodynamics of, in children during balanced anesthesia [Sloan, Bissonnette, Lerman], A1103
- interaction of ORG9426 and other nondepolarizing muscle relaxants in live rats [Watanabe, Ohta, Tejeda, Manabe, Nagashima, Foldes], A888
- neuromuscular blockade, at vocal cords and adductor pollicis in humans [Donati, Plaud, Meistelman], A884
- pharmacodynamics of, in patients with and without renal failure [Peschaud, Kienlen, Rey, Marres, Momas, d'Athis, de Cailar], A916
- priming before: curare vs. [Butterworth, Ray, Dudas], A907
- study of propofol interaction with [McCarthy, Pandit, McLoughlin, Mirakhur, Clarke], A899



vasoconstriction and neuromuscular blockade in humans [Heier, Sessler, Caldwell, Miller], A861  
**Neuropathy.** *See under Nerve*  
**Neurosurgical anesthesia.** *See under Anesthesia*  
**Neurotoxicity.** *See under Toxicity*  
**Nicardipine.** *See under Anesthetic techniques; Pharmacology*  
**Nifedipine.** *See under Heart*  
**Nitrendipine.** *See under Pharmacology*  
**Nitroglycerin.** *See under Heart; Pharmacology*  
**Nitroprusside.** *See under Anesthetic techniques; Heart; Pharmacology*  
**Nitrous oxide.** *See under Anesthetics, gases*  
**Norepinephrine.** *See under Sympathetic nervous system*  
**Nuclear magnetic resonance.** *See under Equipment; Measurement techniques*

## O

**Obesity.** *See under Complications*  
**Obstetric anesthesia.** *See under Anesthesia*  
**Ondansetron.** *See under Pharmacology*  
**Operating rooms**  
     evaluation of anesthesiologist's present check-out methods and a test of validity of FDA checklist for use by anesthesiologists [March, Crowley], A1020  
     standardized drug trays and carts in anesthesiology [Christie], A1019  
**Ophthalmologic anesthesia.** *See under Anesthesia*  
**Opioid receptors.** *See under Receptors*  
**ORG9426.** *See under Neuromuscular relaxants*  
**Orthopedic anesthesia.** *See under Anesthesia*  
**Orthopedic surgery.** *See under Surgery*  
**Otolaryngologic anesthesia.** *See under Anesthesia*  
**Outpatient anesthesia.** *See under Anesthesia*  
**Oximeters.** *See under Measurement techniques*  
**Oxygen.** *See also under Monitoring*  
     **blood levels**  
         increases in arterial oxygen tension during liver transplantation [Gunning, Ramsay, Paulsen], A278  
         persistent occurrence of postoperative arterial oxygen desaturations despite oxygen therapy [Russell, Graybeal], A540  
         variability of arterial and venous blood gas and co-oximetry measurements [Scuderi, Prough, Brockschmidt, Case], A218  
     **consumption**  
         increases in arterial oxygen tension during liver transplantation [Gunning, Ramsay, Paulsen], A278  
         independent simultaneous measurement of oxygen delivery and, during normovolemic hemodilution [Ciofalo, Baron, Arthaud, Viars], A80  
     **delivery systems**  
         persistent occurrence of postoperative arterial oxygen desaturations despite oxygen therapy [Russell, Graybeal], A540  
         high PO<sub>2</sub> improves flow and function in ischemic myocardium [Cason, Wisneski, Hickey, Shnier, Gertz], A598  
     **measurement**  
         co-oximetry, variability of arterial and venous blood gas and [Scuderi, Prough, Brockschmidt, Case], A218  
     **monitoring**  
         oxygen saturation following administration of buprenorphine or morphine during postoperative period [Fischler, Basdevant, Gauthe-Feissel, Raffin, Sperandio], A1252  
         variability of arterial and venous blood gas and co-oximetry measurements [Scuderi, Prough, Brockschmidt, Case], A218  
     **tension**  
         intraoperative FIO<sub>2</sub> and development of mitomycin-induced

postoperative interstitial pneumonitis [Desiderio, Alagesan, Fischer, Bedford, Rusch], A1177  
**toxicity**  
     electron microscopic localization of antioxidant enzymes in rat lung [Coursin, Cihla, Bindley, Wallow, Oberley, Oberley], A1225  
     intraoperative FIO<sub>2</sub> and development of mitomycin-induced postoperative interstitial pneumonitis [Desiderio, Alagesan, Fischer, Bedford, Rusch], A1177  
     modulation of intracellular calcium fluxes in oxidant-injured endothelial cells by halothane and isoflurane [Shayevitz, Varani, Knight], A341  
     perioperative effect of anesthesia on superoxide production in neonates and infants [Mikawa, Maekawa, Obara, Uetani, Nakamura], A1093  
     superoxide production by simulated endothelial cells exposed to varying halothane concentrations [Noorily, Shayevitz, Varani], A403

**Oxygenation.** *See under Brain*

**Oxymorphone.** *See under Analgesics*

## P

**Pacemaker.** *See under Equipment; Heart*

## Pain

### chronic

effect of magnetic field therapy on substance P and methionine enkephalin in rat model of [Parris, Naukam, Lindsey, Bowers, Fraifeld, Wright, Kambam], A1262  
 intermittent single shot interpleural analgesia as adjunct to narcotic therapy for chronic pancreatitis [Morris, Tapia, Gallagher, Kartha], A858  
 long term epidural catheters in terminally ill patients: prospective study of complications in 129 patients [Tryba, Zenz, Strumpf], A784

### mechanism

perioperative substance P levels and incidences of nausea and vomiting and, in inhibition of acetylcholinesterase [Kambam, Blanks, Alhaddad, Naukam, Stowe], A10

### postoperative

balanced anesthesia and: is narcotic important? [Varlotta, Smalto], A848  
 varying narcotic requirements among orthopedic patients [Preble, Paige, Sinatra, O'Connor, Sevarion], A813

### sciatica

effects of capsaicin on sciatic nerve sensory and motor function [Braverman, Kerns, Ivankovich], A752

### transcutaneous nerve stimulation

effect of transcutaneous cranial electrical stimulation on halothane requirements in rats [Mantz, Azerad, Limoge, Thierry, Glowinski, Desmonts], A671

**Pancuronium.** *See under Neuromuscular relaxants*

**Papaverine.** *See under Pharmacology*

**Paracervical block.** *See under Anesthetic techniques*

## Parasympathetic nervous system

acetylcholine receptors mediate masseter muscle rigidity [Storella, Keykhah], A871  
 continuous infusion of d-tubocurarine induces tolerance and increases in nicotinic acetylcholine receptors [Hogue Jr., Itani, Martyn], A1273  
 effect of secobarbital and halothane on cholinergic binding to neuronal nicotinic receptors [Dodson, Braswell], A699  
 impaired beta-adrenergic-cholinergic interaction leading to airway hyperreactivity in basenji-greyhound [Tobias, Sauder, Hirshman], A1160

- methyguanidine increases evoked release of acetylcholine from rat brain [Ohta, Nitta, Vizi, Nagashima, Folds], A684
- scopolamine**  
transdermal, does not decrease incidence of nausea and vomiting after alfentanil anesthesia [Bosek], A371
- vagus**  
preferential inhibition of impulses in C-fibers of rabbit vagus nerve by veratridine, an activator of sodium channels [Schneider, Datta, Strichartz], A790
- Parathyroid hormone. See under Hormones**
- Pediatric anesthesia. See under Anesthesia**
- Pentamorphone. See under Analgesics**
- Pentobarbital. See under Hypnotics**
- Pentoxifylline. See under Pharmacology**
- Peridural space. See under Anatomy**
- Pharmacodynamics**  
**distribution**  
intravascular disposition of indocyanine green from moment of administration [Krejcie, Henthron, Shanks, Asada], A380
- model**  
intravascular disposition of indocyanine green from moment of administration [Krejcie, Henthron, Shanks, Asada], A380
- pharmacodynamics of high-dose vecuronium in children during balanced anesthesia [Sloan, Bissonnette, Lerman], A1103
- pharmacodynamics of vecuronium in patients with and without renal failure [Peschaud, Kienlen, Rey, Marres, Momas, d'Athis, de Cailar], A916
- pharmacokinetic and pharmacodynamic modelling for anesthesia simulation [Beinlich, Gaba, Williams, Ebling], A1041
- Pharmacokinetics**  
age-related cocaine uptake in rats [Morishima, Khan, Hara, Cooper, Miller], A929
- of atracurium during continuous infusion under fentanyl anesthesia [Beemer, Bjorksten, Crankshaw], A904
- computer-controlled infusion of atracurium [O'Hara, Derbyshire, Overdyk, Bogen, Marshall], A414
- diffusion**  
oral transmucosal permeability of fentanyl and isoproterenol in dog model: pH dependence [Zhang, Ebert, de Boer, Niu, Stanley], A367
- distribution**  
plasma protein binding determines partitioning of lidocaine into brain and CSF following intravenous bolus administration in dogs [Bowdle, Artru, Marathe, Shen], A355
- distribution of self-administered morphine and meperidine into human breast milk: acute neonatal neurobehavioral effects [Wittels, Scott, Sinatra], A921
- effects of cardiopulmonary bypass on alfentanil pharmacokinetics and protein binding in infants and children [Davis, Stiller, Cook], A1120
- effects of halothane reduction on regio-specific metabolism of R- and S-Warfarin in hepatic microsomes [Baker, Vasquez, Chiang], A360
- extrahepatic propofol metabolism: an evidence [Veroli, O'Kelly, Bertrand, Trouvin, Farinotti, Ecoffey], A329
- influence of different liposomal formulations on pharmacokinetics of encapsulated bupivacaine [Legros, Luo, Bourgeois, Lafont, Boogaerts], A851
- of intrathecal morphine in cesarean section patients [Zakowski, Grant, Khoo, Ramanathan, Turndorf], A946
- models**  
characterizing antipyrine disposition from moment of its administration [Shanks, Henthron, Kaczynski, Asada, Krejcie, Avram], A377
- midazolam pharmacokinetics in children after intranasal administration [Malinovsky, Le Normand, de Dieuleveult, Lepage, Cozian], A388
- pharmacokinetics of long-term alfentanil infusion used for sedation in patients in ICU [Martin, Albanese, Alazia, Levron], A335
- pharmacokinetics of sufentanil and fentanyl after a long duration infusion [Cathelin, Levron, Maroudy, Andrieu, Viars], A390
- programmed infusion of alfentanil based on lean body mass [Crankshaw, Morgan, Beemer, Karasawa], A332
- in mothers and neonates of fentanyl, alfentanil and sufentanil administered by epidural continuous infusion during labor [Palot, Visseaux, Levron, Le Moing, Rendoing], A1002
- of nalmefene, an opioid antagonist [Levinson, Reynolds, Kisicki, Lee], A356
- neuromuscular effects and biodisposition of 3-desacetylvecuronium in cats [Segredo, Shin, Sharma, Gruenki, Caldwell, Khuenl-Brady, Agoston, Miller], A894
- pharmacodynamic and, modelling for anesthesia simulation [Beinlich, Gaba, Williams, Ebling], A1041
- profiles of epidural alfentanil and fentanyl: bolus followed by continuous infusion technique [Wilhite, Moore, Christmas, Frank], A940
- relationship between serum F<sup>-</sup> and cytochrome P-450 after sevoflurane anesthesia in ethanol treated rats [Masaki, Kondou, Kobayashi], A396
- scimed oxygenator and fentanyl uptake [Rosen, Rosen, Leong], A449
- Pharmacology. See also under Blood; Heart; Sympathetic nervous system**
- acetazolamide**  
in treatment of acute mountain sickness: clinical efficacy and effect on gas exchange [Grisson, Sarnquist, Roach, Hackett], A1183
- adenosine**  
intravenous, analgesic activity of: comparison of potency with morphine sulfate [Ginsburg, Fukunaga, Sasaki, Kikuta, Fukunaga], A362
- adenosine triphosphate**  
intravenous, effect of, on enflurane N<sub>2</sub>O MAC in spontaneously breathing rabbits: assessment of cardiorespiratory effects [Kikuta, Fukunaga, Ginsburg, Fukunaga, Okada], A401
- almitrine**  
PaO<sub>2</sub> increase induced by, persists in absence of pulmonary pressure increase [Plaisance, Mebazaa, Payen], A1150
- prolonged intravenous infusion of, effect on gas exchange and hemodynamics in ARDS patients [Plaisance, Loriferne, Brun-Buisson, Lemaire], A1178
- amiodarone**  
halothane and: effects on canine purkinje fiber action potentials [Gallagher, Bianchi, Gessman], A663
- amrinone**  
differential effects of, on pulmonary responses to histamine [Grayson, Tobias, Hirshman], A1166
- increase of venous admixture and decrease of arterial oxygenation by, after coronary artery bypass graft surgery [Prielipp, Butterworth IV, Zaloga, Robertie, Royster], A1230
- reduction of elevated pulmonary vascular resistance by, in isolated, perfused rabbit lungs [Murray, Powers, Clarke], A1162
- antipyrine**  
pharmacokinetic model characterizing disposition of, from moment of administration [Shanks, Henthron, Kaczynski, Asada, Krejcie, Avram], A377
- aprotinin**  
high-dose, routine application of, in open-heart surgery: study on 1,784 patients [Dietrich, Hähnel, Richter], A146

# **cyclosporin**

- does it potentiate effect of neuromuscular blocking agents in vitro? [Koller, Khuenl-Brady, Mair, Wieser], A900
- renal function following [Fish, Rice, Peterson], A361

# **desmopressin**

- hemodynamic response to, in early postcardiopulmonary bypass period [Weiss-Bloom, Reich, Hamerschlag, Perucho, Thys], A150
- tranexamic acid, not both or, decreases bleeding after open heart surgery [Horrow, Van Riper, Parmet, Strong, Brodsky, Osborne], A63

# **diltiazem**

- pretreatment, bupivacaine cardiorespiratory toxicity reduced by, in rats [Kinney, Kambam, Wright, Naukam], A811
- regional intravenous injection of Ca-antagonist in treatment of Raynaud's syndrome and reflex sympathetic dystrophy [Kawanishi, Hosoda, Kurokawa, Enomoto, Shimada], A809

# **dobutamine**

- comparison of PDE inhibitor enoximone with, following mitral valve replacement [Tarr, Frazer, Moore, Desmond], A121

# **doxorubicin**

- cardiotoxicity, oxygen dependency of, in perfused rat hearts [Mueller, Carter, Ganey, Thurman], A563

# **dronabinol**

- use of, for preanesthetic medication [Taylor, Monk, White], A386

# **enoximone**

- comparison of, with dobutamine following mitral valve replacement [Tarr, Frazer, Moore, Desmond], A121

# **indocyanine green**

- intravascular disposition of, from moment of administration [Krejcie, Henthron, Shanks, Asada], A380

# **isradipine**

- for treatment of hypertension during abdominal surgery [Dartay, Edouard, Samii], A142

# **methylphenidate**

- meperidine vs., for treatment of postanesthesia shivering [Boylan, Gallagher, Kelly, Stritch, MacEvilly], A1067

# **metoclopramide**

- as cause of dysphoria [Horton, Chadwick], A38

# **milrinone**

- hemodynamic effects of, following cardiac surgery [European Multicenter Milrinone Trial Group], A133

# **nicardipine**

- effects of hypocapnic alkalosis on vasodilating action of [Combes, Fauvage, Hubert, Guerret, Girardet], A145
- hemodynamic effects of, used for treatment of sternotomy-induced hypertension [Marty, Pansard, Lancon], A1200
- protection from bupivacaine-induced cardiorespiratory toxicity by, in rats [Matsuda, Kinney, Wright, Kambam], A768
- regional intravenous injection of Ca-antagonist in treatment of Raynaud's syndrome and reflex sympathetic dystrophy [Kawanishi, Hosoda, Kurokawa, Enomoto, Shimada], A809

# **nitrendipine**

- superoxide dismutase and, reduction of ischemic renal injury by [Schell, Jacobsen, Matsumura, Cole, Stewart], A1231

# **nitroglycerin**

- acetyl-salicylic acid reverses fall in PaO<sub>2</sub> induced by, in anesthetized obese patients [In-nami, Takasaki, Kawaguchi, Okada], A1179
- infusion, effect of, on effective pulmonary capillary pressure in postoperative period of major vascular surgery [Amardeil, Fargnoli, Peyrin, Girardet, Grimberty], A144
- topical, in treatment of purpura fulminans [Irazuzta, McManus], A307

# **nitroprusside**

- esmolol vs., for hypotension: dose response during isoflurane anesthesia [DelValle, Edmondson, Reinsel, Shah, Herr, Bedford], A143

# **ondansetron**

- initial evaluation of, a novel antiemetic [Bodner, Poler, White], A328

# **papaverine**

- intrathecal, administration decreases risk for spinal cord ischemia in relation with thoracic aortic aneurysm surgery [Godet, Bertrand, Kieffer, Chiras, Coriat, Daas, Viars], A185

# **pentoxifylline**

- inhibition of hypoxia-induced pulmonary hypertension by, in pig [Toung, Aizawa, Grayson, Reily, Traystman], A273

# **phenytoin**

- suppression of succinylcholine-induced fasciculations by, dose-related response [Gordon, Abou-Madi, Trop, Falkenstein], A183

# **piroximone**

- hemodynamic effects of, to assist in weaning from CPB [Tarr, Frazer, Moore, Desmond], A120

# **superoxide dismutase**

- nitrendipine and, reduce ischemic renal injury [Schell, Jacobsen, Matsumura, Cole, Stewart], A1231

# **urapidil**

- hemodynamic and ventilatory effects of nitroglycerine and, following coronary artery bypass grafting [Mollhoff, Rosiers, Van Aken], A73
- for treatment of sternotomy-induced hypertension [Marty, Pansard, Lancon], A88

# **verapamil**

- pretreatment, bupivacaine cardiorespiratory toxicity reduced by, in rats [Kinney, Kambam, Wright, Naukam], A812
- regional intravenous injection of Ca-antagonist in treatment of Raynaud's syndrome and reflex sympathetic dystrophy [Kawanishi, Hosoda, Kurokawa, Enomoto, Shimada], A809

# **veratridine**

- preferential inhibition of impulses in C-fibers of rabbit vagus nerve by, an activator of sodium channels [Schneider, Datta, Strichartz], A790

# **warfarin**

- effects of halothane reduction on regio-specific metabolism of, in hepatic microsomes [Baker, Vasquez, Chiang], A360

# **Phenylephrine. See under Sympathetic nervous system**

# **Phenytoin. See under Pharmacology**

# **Phonocardiography. See under Measurement techniques**

# **Pipecuronium. See under Neuromuscular relaxants**

# **Piperidine. See under Analgesics**

# **Piroximone. See under Pharmacology**

# **Placenta**

- metabolism during hypoxia [Grant, Arismendy, Ramanathan, Turndorf], A731
- perfused, human, transport of thiopental across [Herman, Downing, Johnson, Knape, Schenker], A973

# **Platelets. See under Blood; Brain**

# **Polypeptides**

- adrenal neuropeptide concentrations in endotoxic shock [Werner, Murray, Lunn, Stoddard, Go, Rorie], A231

# **angiotensin**

- converting enzyme inhibitor captopril improves neurologic outcome from incomplete ischemia rats [Werner, Hoffman, Kochs, Rabito, Albrecht], A695
- prophylactic effect of intravenous enalaprilat on intraoperative hypertension [Heropoulos, Schieren, Seltzer, Bartkowski, Lessin, Torjman, Goldberg], A92

**atrial natriuretic factor**

- plasma concentration of, pulsatile flow during cardiopulmonary bypass for coronary surgery fail to influence [Deswarte-Pipien, Ponzio, Barthelemy, Lobstin, Fabiani, Carayon, Cousin], A453
- can serum TNF open a therapeutically relevant diagnostic "window" in septic patients? [Hammerle, Krafft, Winternitz, Weinstabl, Plattner], A244
- capsaicin and pulmonary effects of endotracheal intubation [Hogman, Hua, Dueck, Yaksh], A1185
- carboxypeptidase N during cardiopulmonary bypass [Rabito, Anders, Soden, Skidgel], A602
- effect of individual branched chain amino acids on contractility and fatigue of diaphragm [Yamada, Kvetan, Ohta, Chaudhry, Nagashima, Askanazi, Elwyn], A259

**endorphins**

- effect of chronic morphine administration on spinal  $\beta$ -endorphin levels [Gutstein, Bronstein, Akil], A683

**endothelin**

- endothelin levels in patients with preeclampsia [Danner, Thorp, Geer, Goetz], A947
- inhibition by isoproterenol of endothelin-mediated production of inositol phosphates in vascular smooth muscle cells [Xuan, Whorton, Watkins], A744
- regulation of endothelin-stimulated calcium release from intracellular stores in vascular smooth muscle cells by isoproterenol [Xuan, Whorton, Watkins], A717

**endothelin**

- alveolar hypoxia increases plasma endothelin-1 level in conscious rats [Shirakami, Magaribuchi, Saito, Nalao, Mori], A615

**enkephalins**

- does chronic intracerebroventricular infusion of thiorphan produce tolerance and dependence in rat? [Eustache, Michael-Titus, Bousselmame, Costentin], A674
- methionine, effect of magnetic field therapy on substance P and, in rat model of chronic pain [Parris, Naukam, Lindsey, Bowers, Fraielfeld, Wright, Kambam], A1262
- neuropeptides: plasma levels in endotoxemic shock [Werner, Murray, Lunn, Stoddard, Go, Rorie], A311
- protein-anesthetic interaction: conformational transition of polypeptide by volatile anesthetics [Chiou, Kamaya, Ueda], A726

**renin-angiotensin**

- catecholamines and plasma renin activity during adenosine and sodium nitroprusside-induced hypotension [Lam, Winn, Grady], A175

**tumor necrosis factor**

- acute vasodilatory effect of, on rabbit carotid artery [Philip, Bernard, Bousseau, Payen, Tedgui], A662
- tumor necrosis factor injected in vivo causes ex vivo left atrial dysfunction in guinea pigs [Heard, Perkins, Fink], A266

**Porphyria. See under Complications****Position****effects**

- body position and displacement of canine diaphragm [Sprung, Rodarte], A1181
- differences between PaCO<sub>2</sub> and PETCO<sub>2</sub> induced by lateral decubitus position during anesthesia [Cholley, Pansard, Clergue, Devilliers, Viars], A490
- of postural changes on postthoracotomy respiratory muscle mechanics during incentive spirometry [Melendez, Alagesan, Weissman, Reinsel, Burt], A1176
- lateral, influence of duration of, during spinal anesthesia on distribution of hyperbaric tetracaine [Salvaj, Gamulin, Schweizer, Forster], A852
- sitting, SSEP monitoring in neurosurgical patients in [Marlar, Shamsi, Tausk, Eisenkraft], A199

**ventilatory**

- body position and displacement of canine diaphragm [Sprung, Rodarte], A1181
- differences between PaCO<sub>2</sub> and PETCO<sub>2</sub> induced by lateral decubitus position during anesthesia [Cholley, Pansard, Clergue, Devilliers, Viars], A490
- effect of postural changes on postthoracotomy respiratory muscle mechanics during incentive spirometry [Melendez, Alagesan, Weissman, Reinsel, Burt], A1176
- what position is more comfortable for parturient during induction of epidural anesthesia? [Vincent, Chestnut, Russell, Walker, Ostman], A978

**Positive end expiratory pressure. See under Ventilation****Postoperative analgesia. See under Analgesia****Postoperative pain. See under Pain****Postoperative ventilation. See under Ventilation****Potassium. See under Ions****Potency, anesthetic****ED50**

- CP50 for sufentanil [Glass, Doherty, Jacobs, Goodman, Reves], A378

**MAC**

- desflurane, effect of fentanyl and nitrous oxide on [Ghouri, White], A392
- desflurane, is decreased but recovery time is unaltered following premedication with midazolam (0.05 mg/kg) [Glostén, Faure, Lichter, Apfelbaum, Roizen, Robert, Bedwell, Karl], A346
- enflurane N<sub>2</sub>O, effect of intravenous ATP on, in spontaneously breathing rabbits: assessment of cardiorespiratory effects [Kikuta, Fukunaga, Ginsburg, Fukunaga, Okada], A401
- halothane, reduction of, by epidural morphine, in humans [Schwieger, Klopfenstein, Forster], A337
- halothane, reduction of, by esmolol, in rats [Partridge, Kon], A333
- hyperbaric nitrous oxide anesthesia in rats for determination of [Russell, Graybeal], A399
- isoflurane, increased by L-644,711, in rats [Matsumura, Cole], A366
- isoflurane, MAC-awake of, evaluated by slow and fast alveolar washout [Mustaki, Gaumann, Tassonyi], A338

**Pregnancy**

- circulatory response to cerebral compression after  $\alpha$ -adrenergic and vasopressin blockade in fetal sheep [Takahashi, Harris, Kohler, Jones Jr., Traystman], A944
- differential influence of, on limbs venous tone in humans [Edouard, Pannier, London, Safar], A955
- does magnesium sulfate alter maternal cardiovascular response to vasopressor agents in gravid ewes? [Sipes, Chestnut, Vincent, Weiner], A969
- does not alter threshold for CNS toxicity to lidocaine in rats [Bucklin, Choi, Warner, Todd, Chestnut], A956
- ultrasound examination of stomach contents in [Carp, Jayaram, Cramp], A957

**Premedication****atropine**

- oral midazolam premedication: optimal timing and effect of [Weldon, Watcha, White], A1243
- clonidine, effect of, on postanesthetic recovery [Bellaiche, Sperandio, Roujas, Lerouge, Bonnet], A187
- clonidine, effects of, for monitored anesthesia [Northfield, Stead], A24
- clonidine, effects of, in neurosurgical patients [Gaumann, Tassonyi, Rivest, Fathi, Reverdin], A1211
- dronabinol for preanesthetic medication [Taylor, Monk, White], A386
- midazolam, desflurane MAC is decreased but recovery time is un-

- altered following [Glosten, Faure, Lichtor, Apfelbaum, Rozen, Robert, Bedwell, Karl], A346
- oral clonidine, effects of, on hemodynamic and catecholamine responses to both brief and prolonged laryngoscopy [Laurito, Baughman, Becker, Pygon, Cunningham, Citron], A98
- oral effervescent cimetidine in daycase anesthesia: effects on gastric pH and volume [Narchi, Edouard, Bourget, Cattaneo, Peiti, Benhamou], A6
- POMS scores in assessment of preoperative anxiety and effect of [Lehtinen, Pippingskold], A191
- Preoperative evaluation.** *See under Anesthesia*
- Procaine.** *See under Anesthetics, local*
- Progesterone.** *See under Hormones*
- Propofol.** *See under Anesthetics, intravenous*
- Propranolol.** *See under Sympathetic nervous system*
- Prostaglandins.** *See under Hormones*
- Protamine.** *See under Blood*
- Protein metabolism.** *See under Metabolism*
- Pseudocholinesterase.** *See under Enzymes*
- Publications**
  - trust, but verify: accuracy of references in four anesthesia journals [McLellan, Brockschmidt, Barnett], A1255
- Pulmonary artery.** *See under Lung*
- Pulmonary artery catheters.** *See under Equipment; Measurement techniques*
- Pulse monitors.** *See under Equipment; Measurement techniques*
- Pulse rate.** *See under Heart*
- Pupils.** *See under Eyes*
- Pyridostigmine.** *See under Antagonists, neuromuscular relaxants*

## R

- Radial artery cannulation.** *See under Arteries*
- Ranitidine.** *See under Histamine*
- Receptors.** *See also under Sympathetic nervous system*
  - acetylcholine, mediate masseter muscle rigidity [Storella, Keykhah], A871
- adrenergic**
  - beta-adrenergic sensitivity in lung periphery of basenji-greyhound and mongrel dogs [Lindeman, Freed, Hirshman], A1198
  - depressive effect of isoflurane on myocardial beta-adrenergic responsiveness is not related to alternation of beta-receptor density [Lancon, Marty, Delforge, Janier, Syrota], A638
  - molecular mechanisms of  $\beta$ -adrenergic hyporesponsiveness in BG model of asthma [Emala, Hirshman, Levine], A1196
  - pentobarbital increases cAMP accumulation in S49 cells independent of guanine nucleotide binding proteins [Gonzales, Molinoff], A670
- continuous infusion of d-tubocurarine induces tolerance and increases in nicotinic acetylcholine receptors [Hogue Jr., Itani, Martyn], A1273
- opioid**
  - chloroprocaine antagonism of epidural narcotic analgesia: receptor specific phenomenon? [Camann, Hartigan, Gilbertson, Johnson, Datta], A934
  - spinal, involvement of, in midazolam-induced antinociception [Tejwani, Rattan, McDonald], A1270
  - structure-activity-relationship difference between prejunctional and postjunctional nicotinic receptors [Baker, Guzzi, Ross, Lowndes], A915
- Records, anesthesia**
  - analysis and frequency of artifacts generated by anesthesia information management systems [Edsall], A481
  - automated, incidence of vital sign artifact in [Stanley, III, Smith, White, Melisko, Hu], A483
  - comparison of manual and automatic charting with a commercially-

- available automatic anesthesia recordkeeper [Block, Jr., Minic, McDonald], A521
- comparison of vigilance using automated vs. hand written records [Yablok], A416
- documentation time requirement computerized information management systems vs. handwritten records [Edsall], A439
- expert system to teach how to troubleshoot common problems of automated anesthesia recordkeeper [Block Jr., McDonald], A1087
- human factors affecting accuracy of hand-written arterial pressure record [Shibutani, Bairamian, Shubhedar, Kashiwagi, Kubal], A1014
- Recovery**
  - characteristics of, comparison of propofol and midazolam-propofol for outpatient anesthesia [Petit, Narchi, Legendre, Benhamou], A31
  - drinking before discharging children from day surgery: is it necessary? [Martin, Whitney, Seidl-Friedman, Nicolson, Schreiner], A1122
  - effect of smoking on duration of recovery room [Handlin, Baker, Woolwich], A1052
  - frequency of residual neuromuscular blockade following atracurium, vecuronium and pancuronium: a multicenter randomized study [Jensen, Engbaek, Andersen, et al], A914
  - hypoventilation and mixed etiology of postoperative hypoxemia [Russell, Graybeal], A1057
  - monitoring with pulse oximetry during anesthesia and in recovery room: is incidence degree and duration of hypoxemia reduced? [Moller, Iversen, Jensen, Johannessen, Espersen], A1089
  - of neuromuscular function in adductor pollicis and flexor hallucis after vecuronium, differential rate of [Brandom, Stiller, Cook, Scierka], A1113
  - onset, duration and, from ORG9426 in elderly [Fiset, Balendran, Bevan], A881
  - oral dexmedetomidine blunts hemodynamic response to emergence from enflurane anesthesia in dogs [Proctor, Schmelling, Kampine, Wartier], A620
  - parameters of, comparison of, propofol vs. midazolam for sedation [Pratila, Fischer, Alagesan, Alagesan, Reinsel, Pratilas], A4
  - postanesthetic, effect of clonidine premedication on [Bellaiche, Sperandio, Roujas, Lerouge, Bonnett], A187
  - postoperative physiological, effectiveness of preanesthetic instructions on [Bennett, Disbrow], A1055
  - of respiratory muscle function in surgical outpatients [Stanec, Nuesa, Akturk, Pillon, Capek], A878
  - recovery room morbidity and mortality associated with renal extracorporeal shock wave lithotripsy [Kovac, Mangold], A1060
- Rectal anesthesia.** *See under Anesthetic techniques*
- Reflexes.** *See under Eyes; Spinal cord*
- Regional anesthesia.** *See under Anesthetic techniques*
- Regional measurements.** *See under Measurement techniques*
- Renin-angiotensin.** *See under Polypeptides*
- Residents.** *See under Education*
- Respiratory distress syndrome.** *See under Lung*
- Respiratory resistance.** *See under Lung*
- Resuscitation.** *See under Heart; Ventilation*
- Retrobulbar local anesthetic.** *See under Anesthetic techniques*
- Ropivacaine.** *See under Anesthetics, local; Toxicity*

## S

- Sacroplasm.** *See under Muscle, skeletal*
- Sciatica.** *See under Pain*
- Scopolamine.** *See under Parasympathetic nervous system*
- Septicemia.** *See under Infection*

**Serotonin**

ondansetron, a selective type 3 antagonist, reduces nausea and vomiting in females following major gynecologic surgery [McKenzie, Odell, Rudy, Joslyn], A739

**Sevoflurane.** *See under* Anesthetics, volatile

**Shivering.** *See under* Complications

**Shock**

cardiogenic, effects of hemopump on organ blood flow distribution during, in dogs [Wouters, Möllhoff, Mees, Van Aken, Flammeng], A444

endotoxemia, hepatic O<sub>2</sub> regulation during [Schlichtig, Klions], A1188

endotoxic, plasma levels in,; neuropeptides [Werner, Murray, Lunn, Stoddard, Go, Rorie], A311

endotoxin, dobutamine and norepinephrine treatment in relation to oxygen delivery and consumption in [Bakker, Vincent], A313

endotoxin, microvascular permeability in liver during [Sigurdsson, Youssef, Christenson, Owunwanne], A262

hemorrhagic, effect of hypertonic saline resuscitation on myocardial performance in,; assessment by pressure-volume loops [Mathru, Rooney, Vengurlekar, Hirsch, Rao], A635

hemorrhagic, in dogs, resuscitation fluids for treatment of,; effects on myocardial blood flow [Larson, Tait], A633

hemorrhagic, trauma plus, reduction of hypoperfusion and prevention of EEG changes in, using a kappa opiate antagonist [DeWitt, Whitley Prough], A698

hypovolemic, treatment of, with hypertonic-hyperoncotic solutions: effects on regional cerebral blood flow [Dautermann, Schürer, Härtl, Berger, Murr, MeBmer, Baethmann], A277

multiple organ failure and platelet trapping in intestine in critically ill patients [Sigurdsson, Christenson, Bader, Sadek], A258

respiratory effects of medical antishock trousers [Pansard, Lazard, Riou, Viars], A434

septic, left ventricular ejection fraction and compliance in patients with cardiorespiratory failure with [Kuss, Hannemann, Bayer, Steingässer, Reinhart], A291

topical nitroglycerin in treatment of purpura fulminans [Irazuzta, McManus], A307

**Shoulder.** *See under* Anesthetic techniques

**Shunting.** *See under* Lung

**Sinoatrial node.** *See under* Heart

**Skeletal muscle.** *See* Muscle, skeletal

**Skin****blood flow**

effect of prostaglandin E<sub>1</sub> on thermoregulation and, during enflurane anesthesia [Takashina, Kamada, Sasaki, Mashimo, Yoshiya], A59

fingertip, skin-surface temperature gradients correlate with fingertip [Rubinstein, Sessler], A432

laser-Doppler measurements of, during sympathetic blockade in patients with reflex sympathetic dystrophy [Irazuzta, Berde, Sethna], A775

vasoconstriction during general anesthesia minimally decreases cutaneous heat loss [Sessler, Moayeri, McGuire, Hynson], A212

comparison of crystalline skin temperature to esophageal temperatures during anesthesia [Brull, O'Connor, Poglitsch, Kosswig, Silverman], A472

**temperature**

effect of prostaglandin E<sub>1</sub> on skin blood flow and thermoregulation during enflurane anesthesia [Takashina, Kamada, Sasaki, Mashimo, Yoshiya], A59

isoflurane-induced vasodilation minimally increases cutaneous heat loss [Sessler, McGuire, Moayeri, Hynson], A87

skin-surface, gradients correlate with fingertip blood flow [Rubinstein, Sessler], A432

vasoconstriction during general anesthesia minimally decreases cutaneous heat loss [Sessler, Moayeri, McGuire, Hynson], A212

**Sodium.** *See under* Ions

**Sodium bicarbonate.** *See under* Acid-base equilibrium

**Solubility**

lipid, barbiturate attenuation of agonist affinity in cerebral arteries correlates with [Germann, Laher, Bevan], A339

**blood**

blood gas solubility and acinar anatomy jointly influences dead-space [Aukburg, Gobran, Neufeld, Scherer], A1155

**Spectroscopy.** *See under* Measurement techniques

**Spinal anesthesia.** *See under* Anesthetic techniques

**Spinal cord****blood flow**

effects of ethanol on, and autoregulation in rats [Koziol- Ehni, Hoffman, Werner, Miletich, Albrecht], A734

effects of propofol on, and autoregulation in rats [Werner, Hoffman, Segil, Miletich, Albrecht], A694

phlebectomy reverses hemodynamic consequences of aortic cross-clamping [Mutch, Thomson, Teskey, Thiessen, Rosenbloom], A630

**dorsal horn ganglia**

cutaneous anesthesia: effects of propofol on non-noxious responses of spinal dorsal horn neurons in cats [Uchida, Collins, Kishikawa, Iwasaki], A697

differential C-FOS oncogene expression in mechanically-vs. chemically-induced visceral nociception [DeLeo, Coombs, McCarthy], A737

interaction between opiate subtypes and serotonin in suppressing noxiously evoked activity of WDR neurons in spinal dorsal horn [Nakatani, Harada, Kitahata, Collins], A735

evaluation of CSF concentrations of glutamate during spinal cord ischemia [Amory, Jasaitis, Nicklas, Zeevalk], A691

involvement of spinal opioid receptors in midazolam-induced antinociception [Tejwani, Rattan, McDonald], A1270

**laminae of dorsal horn**

differential C-FOS oncogene expression in mechanically-vs. chemically-induced visceral nociception [DeLeo, Coombs, McCarthy], A737

magnesium to protect against spinal cord ischemia [Amory, Jasaitis, Wright], A732

**reflexes**

cutaneous anesthesia: effects of propofol on non-noxious responses of spinal dorsal horn neurons in cats [Uchida, Collins, Kishikawa, Iwasaki], A697

differential C-FOS oncogene expression in mechanically-vs. chemically-induced visceral nociception [DeLeo, Coombs, McCarthy], A737

interaction between opiate subtypes and serotonin in suppressing noxiously evoked activity of WDR neurons in spinal dorsal horn [Nakatani, Harada, Kitahata, Collins], A735

minimum alveolar concentration of spinal cord reflexes in rats [Soriano, Benthuyssen, Reitan], A705

**Spinal headache.** *See under* Complications

**Stellate ganglion block.** *See under* Anesthetic techniques

**Steroid anesthesia.** *See under* Anesthetics, intravenous

**Stomach.** *See under* Gastrointestinal tract

**Succinylcholine.** *See under* Neuromuscular relaxants

**Sufentanil.** *See under* Analgesics; Anesthetics, intravenous

**Sufflation.** *See under* Anesthetic techniques

**Superoxide dismutase.** *See under* Enzymes; Pharmacology

# Surgery

## cardiovascular

- abnormal findings of descending thoracic aorta in patients undergoing coronary artery bypass surgery examined by transesophageal echocardiography [Orihashi, Keehn, Hong, Sisto, Goldiner, Oka], A431
- alpha-stat vs. Ph-stat: effect of varying bypass flow rate upon cerebral blood flow [Hindman, Funatsu, Harrington, Kutcomp, Miller, Chun, Todd, Tinker], A570
- amrinone increases venous admixture and decreases arterial oxygenation after coronary artery bypass graft surgery [Priellipp, Butterworth IV, Zaloga, Robertie, Royster], A1230
- analysis of five years experience in over 3,000 patients of intraoperative autologous blood salvage with cardiac surgery [Ikeda, Yaki, Johnston, Schweiss, Horman], A156
- atelectasis and pleural fluid examined by transesophageal echocardiography during coronary artery bypass grafting [Hong, Orihashi, Keehn, Sisto, Goldiner, Oka], A454
- blood flow is inversely related to pulmonary vascular resistance in patients with left ventricular assist device [Siegel, Ramasamy, Oyer, Greene, Portner], A101
- bolus doses of esmolol for prevention of perioperative hypertension and tachycardia in [Duke, Goertzen, Muirhead, Greengrass, Paetkau], A96
- carboxypeptidase N during cardiopulmonary bypass [Rabito, Anders, Soden, Skidgel], A602
- cardiac output fails to increase with pacing in cardiac surgical patients [Johnston, Robertie, Dudas, Kon, Vinten-Johansen], A81
- cerebral autoregulation during cardiopulmonary bypass is temperature dependent in infants [Taylor, Burrows, Bissonnette], A72
- clonidine decreases ischemic events during coronary artery surgery [Kent, Thomsen, Cicala], A129
- comparison of PDE inhibitor enoximone with dobutamine following mitral valve replacement [Tarr, Frazer, Moore, Desmond], A121
- complement moderation of cardiopulmonary response to bacteremia in sheep [Dehring, Traber, Traber, Arens], A232
- continuous endobronchial insufflation during median sternotomy [Watson, Szarko, Sequeira, Mackenzie, Mark], A1192
- continuous noninvasive assessment of brain oxygenation and blood volume during cardiopulmonary bypass in children undergoing ASD closure [Steven, Kurth, Nicolson, Phoon, Chance], A457
- contrast echocardiography: direct, on-line, intraoperative assessment of regional myocardial perfusion during CABG surgery [Aronson, Lee, Wiencek, Feinstein, Roizen, Karp, Ellis], A1208
- coronary bypass graft flow vasodilation induced by isoflurane has only negligible effects on left ventricular systolic function [Leclerc, Fratacci, Dupuy, Payen], A147
- decrements in cognitive function following coronary artery surgery: prospective study [Murkin, Martzke, Sim, Buchan, Sharma], A115
- effect of cerebral perfusion pressure during cardiopulmonary bypass on neuropsychiatric outcome following coronary artery bypass grafting [Stanley, Smith, White, Morrison, Blumenthal, Barker, Schniebolz, Newman, Croughwell, Reves], A93
- effect of elective cardiopulmonary bypass surgery and hemodilution on serum erythropoietin levels and erythropoiesis [D'Ambra, Risk, Schneider, Vlahakes, Lynch], A106
- effects of hemopump on organ blood flow distribution during cardiogenic shock in dogs [Wouters, Möllhoff, Mees, Van Aken, Flameng], A444
- etomidate modifies hemodynamic response to high dose fentanyl induction in patients with poor left ventricular function: randomized study [Schlumberger, Cedda, Raffin, Dubois, Fischler], A152
- evidence for immunological effects of catecholamines after cardiac surgery [Eustache, Lees, Deghmani, Petit, Oksenhendler, Winckler], A1202
- factors influencing cerebral blood flow velocity during cardiopulmonary bypass [Renz, Karliczek, Beyer, Jepsen], A124
- gross neurologic outcome in CABG patients managed with single or multiple aortic crossclamp: preliminary retrospective analysis [Scheller, Glina, Massei], A78
- hemodynamic and ventilatory effects of urapidil and nitroglycerine following coronary artery bypass grafting [Mollhoff, Rosiers, Van Aken], A73
- hemodynamic effects of nicardipine used for treatment of sternotomy-induced hypertension [Marty, Pansard, Lancon], A1200
- hemodynamic effects of PDE inhibitor piroximone to assist in weaning from CPB [Tarr, Frazer, Moore, Desmond], A120
- hemodynamic effects of variable dose IV milrinone following cardiac surgery [European Multicenter Milrinone Trial Group], A133
- hemodynamic response to desmopressin in early postcardiopulmonary bypass period [Weiss-Bloom, Reich, Hamerschlag, Peruchio, Thys], A150
- heparin management protocol for cardiopulmonary bypass does not influence postoperative bleeding [Gravlee, Rogers, Dudas, Whitaker, Case], A114
- improved intraoperative detection of interatrial shunts by transesophageal echocardiography [Konstadt, Louie, Kanuri, Rao, Scanlon], A1209
- influence of isoflurane vs. methohexitone on cerebral blood flow velocity autoregulation during cardiopulmonary bypass [Renz, Kalriczek, Kraus, Höche], A126
- interleukin 1 levels during and after normothermic cardiopulmonary bypass [Mazer, Freedman, Hayward], A155
- intracranial air embolism is detected by transcranial Doppler during cardiopulmonary bypass procedures [Albin, Hantler, Bunegin, Grover, Cohen, Mitzel], A458
- is coronary revascularization using internal mammary artery contraindicated in patients with COPD? [McCarthy, Tuman, Ivankovick], A1210
- is thromboelastograph a clinically useful predictor of blood loss after bypass? [Van Riper, Horrow, Osborne], A1206
- locations of retained intracardiac air in coronary artery bypass grafting using transesophageal echocardiography [Orihashi, Hong, Keehn, Goldiner, Oka], A430
- lorazepam uptake by different designs of membrane oxygenators [Rosen, Rosen, Leong], A437
- mechanisms of bleeding reduction induced by aprotinin during cardiopulmonary bypass: a controlled study [Commin, Lu, Soria, Caen, Piwnica, Echter], A1205
- mixed venous oximetry in cardiac surgical patients [Hanson, III, Geer], A438
- multiple dose administration of DDAVP in uncomplicated cardiac surgery [Marquez, Koehler, Strelec, Benckart, Cottingham, Torepy], A1204
- pacing artifacts create "pseudoischemia" in processed EEG in patients during cardiopulmonary bypass [Roy, Prough, Phipps], A526
- persistence of neuropsychological deficits following CABG [Stump, Newman, Coke, Phipps, Miller], A113
- pH management during hypothermic cardiopulmonary bypass

- does not influence cerebral oxygen consumption [Murkin, Sharpe, Farrar], A117
- phospholipase A<sub>2</sub> activity and prostaglandin levels during cardiac surgery [Nakamura, Philbin, Peterson, deBros, Bonentre], A118
- platelet receptors for adhesive legands are decreased during cardiopulmonary bypass [Rinder, Rinder, Ault, Smith], A74
- postoperative myocardial ischemia in patients undergoing coronary artery bypass graft surgery [Smith, Leung, Mangano], A79
- postoperative neurological function in patients undergoing elective coronary artery surgery: a prospective study [Murkin, Buchan, Sim, Martzke, Sharma], A161
- predeposited autologous blood use reduces frequency of homologous blood transfusion without hemodynamic compromise in cardiac surgery patients [Samule, Geary, Moberg, Sheikh, Lumb], A102
- preoperative predictive factors of myocardial ischemia prior to bypass to CABG patients [Fischler, Ceddaha, Schlumberger, Raffin, Dubois], A151
- pulsatile flow during cardiopulmonary bypass for coronary surgery fail to influence plasma atrial natriuretic factor concentration [Deswarte-Pipien, Ponzio, Barthelemy, Lobstin, Fabiani, Carayon, Cousin], A453
- right heart failure and prostaglandin E1 after heart transplantation [Sorbara, Pittarello, Bonato, Gallucci, Giron], A223
- right ventricular wall motion following cardiopulmonary bypass [Rafferty, Durkin, Eleftheriades, Hines, O'Connor], A158
- risk factors for multisystem organ failure after cardiac surgery [Tuman, McCarthy, Corey, Ivankovich], A314
- role of benzyl alcohol preservative in heparin-induced hypotension prior to cardiopulmonary bypass [Kelleher, Smith, Hull, Blomberg, Ruff], A130
- routine application of high-dose aprotinin in open-heart surgery: study on 1,784 patients [Dietrich, Hähnel, Richter], A146
- scimed oxygenator and fentanyl uptake [Rosen, Rosen, Leong], A449
- shed mediastinal blood and 2,3-diphosphoglycerate after cardiac surgery [Isetta, Samat, Masseyeff, Kotaiche, Jourdan], A128
- somatosensory evoked potential latency changes during hypothermic cardiopulmonary bypass [Ostapovich, Silvay, Salter, Zappulla], A200
- successful transplantation of dog hearts after 24 hours cold storage [Mollhoff, Sukehiro, Flameng, Van Aken], A628
- sufentanil decreases EEG spectral edge frequency more than ketamine during hypothermic cardiopulmonary bypass [Silvay, Salter, Ostapovich, Reich, Zappulla], A201
- systolic pressure variation may unmask acute left ventricular ischemic dysfunction upon weaning from cardiopulmonary bypass [Perel, Koman, Geva, Smolinsky], A137
- thromboelastographic evaluation of effect of cell saver blood on coagulation in post cardiopulmonary bypass patient [Weiss, McNulty, Schmitz], A83
- tranexamic acid, not desmopressin or both, decreases bleeding after open heart surgery [Horrow, Van Riper, Parmet, Strong, Brodsky, Osborne], A63
- uptake of lorazepam and midazolam by scimed membrane oxygenator [Rosen, Rosen, Leong], A474
- urapidil for treatment of sternotomy-induced hypertension [Marty, Pansard, Lancon], A88
- vecuronium infusion vs. meperidine in treatment of shivering following cardiopulmonary bypass [Fassero, Berend, Sladen], A1229
- carotid endarterectomy**
- deep and superficial cervical plexus block with bupivacaine for; pharmacokinetic study [Debaene, Elman, Squalli, Jolis, Mazoit], A782
- lidocaine and bupivacaine dosages in cervical block for [Goursot, Mazoit, Dufieux, Bismut, Carrat], A822
- thiopental effect on cerebral blood flow during [Young, Prohownik, Ostapovich, Correll, Ornstein], A170
- gynecologic**
- comparison of epidural and intravenous PCA after [Walmsley, McDonnell, Colclough, Kennedy, Witt, Littrell, Pedito], A1268
- maxillofacial**
- incidence of venous air embolism in radical neck dissection surgery [Rice, Gonzalez, Labate, Cwalina, Tome], A1082
- mediastinoscopy**
- anesthetic management of mediastinal masses revisited [Fisher, Alagesan, Bedford, Burt], A1079
- orthopedic**
- fractured tibia, analgesia for, using sciatic nerve block [Roupie, Mahiou, Fraisse, Jean, Pasteyer], A825
- joint replacement, "smoother" pain control with epidural vs. patient-controlled IV morphine following surgery [Weller, Rosenblum, Conard, Gross], A823
- shoulder surgery, continuous interscalene analgesia vs. patient control analgesia for [Ali, Dobkowski, Komar, Hawkins, Varkey], A828
- total hip arthroplasty, hemodynamic changes in patients undergoing; cemented vs. noncemented [Ereth, Lennon, Rose, Lewallen], A110
- thoracic**
- heart-lung transplant, effects of fluid balance and prostaglandin E1 on reimplantation pulmonary edema in [Norgaard, McGlinch, Dikel, Estrin], A1189
- lung surgery, immunological and hormonal responses to, during one-lung ventilation [Tønnesen, Hähndorf, Brinklow, Andersen, Bendtzen], A1174
- pneumonectomy, determinants of outcome following [Alfille, Hurford], A1072
- postthoracotomy patients, epidural vs. intravenous fentanyl infusions in; analgesic and pharmacokinetic effects [Panos, Sandler, Stringer, Badner, Lawson, Friedlander, Koren], A831
- postthoracotomy respiratory muscle mechanics, effect of postural changes on, during incentive spirometry [Melendez, Alagesan, Weissman, Reinsel, Burt], A1176
- single-lung transplantation, is conventional ventilation adequate in COPD patients during? [Rogers, Sharp, Hantler, Calhoon, Erian], A1184
- thoracotomy, does intrapleural lidocaine infusion decrease patient controlled analgesia morphine consumption after? [Raffin, Antoniotti, Sperandio, Mazoit, Fischler], A826
- tracheotomy**
- mini-tracheotomy: review of 68 cases [Gayard, Combes, Fauvage, Girardet, Passagia], A290
- transplantation**
- blood flow is inversely related to pulmonary vascular resistance in patients with left ventricular assist device [Siegel, Ramasamy, Oyer, Greene, Portner], A101
- bone marrow harvest, evaluation of hemodynamic effects of, under general anesthesia [Kettler, Aggarwal, Bratanow, Dhamee, Ebert, Entress, Krebs], A109
- heart, determinants of ventricular performance during induction of anesthesia in [Dikel, Gruber, Watkins, Estrin], A107
- heart, right heart failure and prostaglandin E1 after [Sorbara, Pittarello, Bonato, Gallucci, Giron], A223



- heart, successful transplantation of dog hearts after 24 hours cold storage [Mollhoff, Sukehiro, Flameng, Van Aken], A628
- heart-lung, effects of fluid balance and prostaglandin E1 on reimplantation pulmonary edema in recipient [Norgaard, McGlinch, Dikel, Estrin], A1189
- is whole body oxygen uptake a good indicator of liver allograft function? [Albaladejo, Jugan, Descorps-Declere], A443
- kidney, human, dissociation between renal hemodynamic and functional effects of titrated doses of dopamine in [Jacob, Villiers, Boudaoud, Pruna, Payen, Teillac, Idatte, Eruin], A224
- liver, adjustment of ventilation to control acidosis without sodium bicarbonate during [Just, Delva, Camus, Lienhart], A296
- liver, adult, continuous monitoring of total body oxygen consumption during [Dieterich, Forst, Groh, Denecke, Peter], A488
- liver, adult, indication of venous bypass according to preliminary test of hepatic vascular exclusion during [Delva, Just, Camus, Hannoun, Parc, Lienhart], A295
- liver, calcium administration during: influence of sampling method used for  $Ca^{++}$  measurement [Just, Delva, Camus, Lienhart], A297
- liver, increases in arterial oxygen tension during [Gunning, Ramsay, Paulsen], A278
- liver, orthotopic, cerebral perfusion pressure during, for liver acute failure [Albaladejo, Jugan, Daibes, Orloff, Ecoffey], A289
- liver, orthotopic, continuous monitoring of mixed venous oxygen saturation during [Jugan, Albaladejo, Descorps Declere, Jayais, Ecoffey], A494
- liver, orthotopic, dose requirements and plasma levels of pipecuronium during renal exclusion and, in pigs [Pittet, Tassonyi, Schopfer, Morel, Mentha, Le Coultre, Benakis], A883
- liver, orthotopic, forced air warming minimizes hypothermia during [Kelley, Csete Prager, Sessler, Roberts, Ascher], A433
- liver, orthotopic, right ventricular function during [De Wolf, Gasior, Begliomini, Kang, Pinsky], A97
- liver, orthotopic, right ventricular function during, with or without bypass [Soilleux, Gillon, Descorps-Declere, Barthe, Ecoffey], A493
- liver, orthotopic, vecuronium or atracurium for? [O'Kelly, Jayais, Veroli, Lhuissier, Ecoffey], A905
- liver, pediatric, effects of inferior vena cava clamping on renal perfusion pressure during [Belani, Estrin], A1134
- liver, pediatric, relation of acid base status to ionized calcium during [Goldman, Vazquez, Jara, Polo, Cruz], A234
- liver, relationship of blood sugar and oxygen consumption heralds graft dysfunction after [Steltzer, Hiesmayr, Tuechy, Zimpher], A235
- liver, renal hemodynamics during, utilizing veno-venous bypass [Gunning, Brown, Swygert, Paulsen, Gonwa, Ramsay], A304
- lung, arterial to end-tidal carbon dioxide tension difference during [Raffin, Moutafis, Bonnette, Bisson, Fischler], A298
- lung, bilateral single: anesthetic management and intraoperative considerations [Triantafillou, Heerdt, Herbst, Pond, Despotis], A90
- lung, single, is conventional ventilation adequate in COPD patients during? [Rogers, Sharp, Hantler, Calhoon, Erian], A1184
- vascular**
- dipyridamole thallium scan is not accurate in detecting coronary stenosis in patients undergoing abdominal aortic surgery [Bertrand, Coriat, Baron, Barre, Thomas, Viars], A86
- effect of acute aortic constriction on systemic and cerebral adenosine in man [Bardenheuer, Pauli, Lauterjung, Cantjohanser, Martin, Peter], A166
- effect of aortic occlusion on canine stunned myocardium [Mazer, Beauchamp, Belo, Kay, Irish], A594
- effect of nitroglycerin infusion on effective pulmonary capillary pressure in postoperative period of major vascular surgery [Amardeil, Fargnoli, Peyrin, Girardet, Grimbert], A144
- effects of infrarenal aortic occlusion on CSF pressure [Bevacqua, Cleary], A771
- effects of isoflurane on hemodynamic changes following infrarenal aortic cross clamping [Menguy, Winckler], A77
- improved neurologic outcome using naloxone and spinal fluid drainage in surgery of thoracoabdominal aorta [Wynn, Archer], A64
- intrathecal papaverine administration decreases risk for spinal cord ischemia in relation with thoracic aortic aneurysm surgery [Godet, Bertrand, Kieffer, Chiras, Coriat, Daas, Viars], A185
- nicardipine but not enalapril prevents renal hemodynamic alteration during infrarenal aortic cross-clamping [Colson, Gouin, Marty-Anc, Mary, Roquefeuil], A95
- phlebotomy reverses hemodynamic consequences of aortic cross-clamping [Mutch, Thomson, Teskey, Thiessen, Rosenbloom], A630
- predictive value of preoperative silent ischemia for postoperative ischemic cardiac events in vascular and nonvascular surgery patients [Fleisher, Rosenbaum, Hawes, Barash], A76
- real time ST segment analysis following abdominal aortic aneurysm resection [Mathews, Weissman], A1228
- right and left arm blood pressure discrepancies in vascular surgery patients [Frank, Norris, Crowley, Christopherson, Beattie], A105
- Sympathetic block. See under Anesthetic techniques**
- Sympathetic nervous system**
- adrenal neuropeptide concentrations in endotoxic shock [Werner, Murray, Lunn, Stoddard, Go, Rorie], A231
- alpha-adrenergic agonists**
- antinociception and  $CO_2$  response following spinal and systemic dexmedetomidine in dogs [Sabbe, Penning, Yaksh], A1269
- clonidine does not cause epidural inflammatory changes [Robichaux, Cicala], A1267
- compared to enflurane, isoflurane produces less depression of stroke volume and autonomic response of canines given phenylephrine [Hoffman, Koev, Solomon, Banks, Yatsiv, Dolan, Clements, Natanson], A410
- dexmedetomidine as analgesic after laparoscopic tubal ligation [Aho, Lehtinen, Erkola, Korttila], A334
- diabetes-induced sensitivity of aortic contraction to phenylephrine is time and endothelium dependent [Chang, Stevens, Lacy], A559
- does magnesium sulfate alter maternal cardiovascular response to vasopressor agents in gravid ewes? [Sipes, Chestnut, Vincent, Weiner], A969
- effects of clonidine premedication for monitored anesthesia [Northfield, Stead], A24
- effects of clonidine premedication in neurosurgical patients [Gaumann, Tassonyi, Rivest, Fathi, Reverdin], A1211
- increased alpha-1 receptor binding: possible mechanism for halothane-epinephrine "sensitization" [Miletich, Minshall, Albrecht], A721
- inhibition of human liver alfentanil metabolism by medetomidine stereoisomers [Kharasch, Hill, Eddy], A379
- isradipine reverses coronary constrictor effects of dexmedetomidine [Flacke, Flacke, de Lange, Lawrence, Prinzen], A608
- myocardial  $O_2$  supply/demand relations during phenylephrine

- induced pressor responses [Crystal, Mahdi, Salem, Kim], A550
- oral dexmedetomidine blunts hemodynamic response to emergence from enflurane anesthesia in dogs [Proctor, Schmelling, Kampine, Wartier], A620
- sedative and hemodynamic effects of dexmedetomidine in humans [Bloor, Ward, Belleville, Maze], A411
- ventilatory effects of desmedetomidine in humans [Belleville, Ward, Bloor, Maze], A1167
- alpha-adrenergic antagonists**
- circulatory response to cerebral compression after  $\alpha$ -adrenergic and vasopressin blockade in fetal sheep [Takahashi, Harris, Koehler, Jones Jr., Traystman], A944
- effects of bunazosin, a new alpha-1 blocker, on regional myocardial function in ischemic canine heart [Kono, Morita, Hayashi, Sato], A616
- effects of urapidil on right ventricular function [Lepage, Pinaud, De Dieuleveult, Malinovsky, Souron], A125
- anesthesia**
- comparison of alfentanil and isoflurane anesthesia on pressor and catecholamine responses during outpatient laparoscopic surgery [Ramanathan, Nocollerat, Birch, Coleman, Heerdt], A50
- beta-adrenergic agonists**
- inhibition by isoproterenol of endothelin-mediated production of inositol phosphates in vascular smooth muscle cells [Xuan, Whorton, Watkins], A744
- maternal and fetal hemodynamic effects of isoproterenol in gravid ewes [Norris, Arkoosh, Kirkland], A948
- naloxone potentiates inotropic but not chronotropic effects of isoproterenol in vitro [Lechner], A587
- oral transmucosal permeability of fentanyl and isoproterenol in dog model: pH dependence [Zhang, Ebert, de Boer, Niu, Stanley], A367
- reduced sensitivity to, reversed by methylprednisolone [Sauder, Tobias, Hirshman], A1195
- beta-adrenergic antagonists**
- bolus doses of esmolol for prevention of perio-operative hypertension and tachycardia in cardiovascular surgery patients [Duke, Goertzen, Muirhead, Greengrass, Paetkau], A96
- change in effectiveness of esmolol when used in repeated doses in electroconvulsive therapy [Howie, McSweeney, Zvara, Coffman, Black], A374
- comparison of the ability of esmolol and alfentanil to attenuate tachycardia and hypertension during emergence from inhalational anesthesia [Ewell, Fuhrman, Pippin, Weaver], A108
- effects of esmolol on pulmonary reactivity in basenji-greyhound [Tobias, Sauder, Hirshman], A1194
- effects of esmolol on cerebral microcirculation [Peck, Lu, Statkus, Gibson, Frost], A626
- esmolol ablates adrenal medullary response to hypotension [Dickstein, Jordan, Miller], A548
- esmolol and controlled hypotension: adverse effects on oxygen extraction [Quinn, Zayas, LeDonne, McDonald, Pickering], A94
- esmolol attenuates increase in intraocular pressure during laryngoscopy and intubation [Badrinath, Braverman, Ivankovich], A382
- esmolol/ $\text{N}_2\text{O}$ /relaxant: a new effective anesthetic maintenance technique [Geva, Sagi, Perel], A320
- esmolol reduces halothane MAC in rats [Partridge, Kon], A333
- esmolol vs. nitroprusside for hypotension: dose response during isoflurane anesthesia [DelValle, Edmondson, Reinsel, Shah, Herr, Bedford], A143
- hemodynamic effects of intravenous dilevalol in patients with coronary artery disease [Demeyere, Flameng, Tjandra Maga], A122
- methylprednisolone prevents propranolol-induced increases in airway responsiveness in basenji-greyhound dogs [Sauder, Tobias], A1158
- therapeutic role of esmolol in perioperative hypertension in ambulatory surgery [Dimich, Singh, Sampson, Pratilas, Sonnenklar], A12
- blockade**
- circulatory response to cerebral compression after  $\alpha$ -adrenergic and vasopressin blockade in fetal sheep [Takahashi, Harris, Koehler, Jones Jr., Traystman], A944
- dual action of halothane on sympathetic function: decrease in NE release and clearance [Deegan, Wood, Wood], A591
- effect of magnesium sulfate on hemodynamics and reflex sympathetic vasoconstriction [Liao, Iijima, Palahniuk], A942
- effect of midazolam and flumazenil on activity of cardiac sympathetic branch [Kimura, Shitaokoshi, Komatsu, Takezawa, Shimada], A397
- etomidate induction maintains sympathetic outflow in humans: direct observations from sympathetic recordings [Ebert, Kanitz, Berens, Kampine], A342
- halothane anesthesia attenuates sympathetic adrenergic regulation of pulmonary circulation following hypotension and hypoperfusion [Murray, Fehr, Chen, Nyhan], A601
- inhibition of sympathetic neural outflow contributes to hypotension during propofol induction in humans [Berens, Ebert, Kampine], A343
- intracoronary infusion of ATP attenuates renal sympathetic nerve activity mediated by ventricular baroreceptors [Taneyama, Nakazawa, Goto, Benson], A686
- laser-Doppler measurements of skin blood flow during, in patients with reflex sympathetic dystrophy [Irazuzta, Berde, Sethna], A775
- bunazosin**
- effects of, a new alpha-1 blocker, on regional myocardial function in ischemic canine heart [Kono, Morita, Hayashi, Sato], A616
- clonidine**
- decreases ischemic events during coronary artery surgery [Kent, Thomsen, Cicala], A129
- does not cause epidural inflammatory changes [Robichaux, Cicala], A1267
- effect of, added to anesthetic solution: duration of block and analgesia after brachial plexus anesthesia with mepivacaine [Singelyn, Gouverneur], A797
- effect of, mass spectrometric measurement of oxygen uptake in postoperative period of major abdominal surgery [Quintin, Viale, Annat, Butin, Hoen, Cottet-Eymard, Motin], A252
- effect of, on postoperative oxygen consumption in humans: a double blind study [Goldfarb, Ang, Debaene, Chhim, Jolis], A317
- effects of labetalol, esmolol and, on hemodynamics and seizure during ECT [Reddy, Rao, Trivedi, Idupuganti, Shevde], A1201
- epidural, effect of, on epidural fentanyl analgesia and pharmacokinetics in postoperative patients [Rostaing, Bonnet, Levron, Vodin, Pluskwa], A779
- experimental resuscitation of bupivacaine cardiotoxic accidents: efficacy of clonidine-dobutamine combination [Viel, de La Coussaye, Bassoul, Eledjam, Sassine], A853
- intramuscular or local, effects of, for prolongation of brachial plexus block with lidocaine [Wyss, Karrp, Mons, Bellhacen, Alame, Ruelle], A821
- intrathecal, response to hemorrhage and [Eisenach], A758

- intrathecal, site of, hypotension induced by [Eisenach], A754
- intravenous, does not promote hypoxemia and platelet aggregation in man [DeKock, Singelyn, Gouverneur], A316
- intravenous, fails to inhibit postoperative shivering [Bernard, Hommerial, Passuti, Pinaud], A240
- low-dose epidural, enhances morphine analgesia without causing hypotension in rabbits [Wang, Hiller, Simon, Li, Rosenberg, Turndorf], A806
- oral, effects of, as sole premedication on hemodynamic and catecholamine responses to both brief and prolonged laryngoscopy [Laurito, Baughman, Becker, Pygon, Cunningham, Citron], A98
- premedication, effect of, on postanesthetic recovery [Bellaiche, Sperandio, Roujas, Lerouge, Bonnett], A187
- premedication, effects of, for monitored anesthesia [Northfield, Stead], A24
- premedication, effects of, in neurosurgical patients [Gaumann, Tassonyi, Rivest, Fathi, Reverdin], A1211
- suppresses postepidural shivering: double blind study [Tryba, Zenz, Pern], A788
- could teratogenicity of N<sub>2</sub>O in rats be due to its sympathomimetic action on embryo? [Fujinaga, Baden], A354
- dexmedetomidine**
- as analgesic after laparoscopic tubal ligation [Aho, Lehtinen, Erkola, Korttila], A334
- isradipine reverses coronary constrictor effects of [Flacke, Flacke, de Lange, Lawrence, Prinzen], A608
- oral, blunts hemodynamic response to emergence from enflurane anesthesia in dogs [Proctor, Schmelling, Kampine, Warltier], A620
- sedative and hemodynamic effects of, in humans [Bloor, Ward, Belleville, Maze], A411
- systemic, spinal and, antinociception and CO<sub>2</sub> response following, in dogs [Sabbe, Penning, Yaksh], A1269
- ventilatory effects of, in humans [Belleville, Ward, Bloor, Maze], A1167
- dobutamine**
- experimental resuscitation of bupivacaine cardiotoxic accidents: efficacy of clonidine-dobutamine combination [Viel, de La Coussaye, Bassoul, Eledjam, Sassine], A853
- less chronotropic than epinephrine after coronary bypass surgery? [Butterworth, Prielipp, Zaloga, Royster, Robertie], A61
- norepinephrine and, in relation to oxygen delivery and consumption in endotoxin shock [Bakker, Vincent], A313
- dopamine**
- dose-dependent effect of, on hypoxic pulmonary vasoconstriction in anesthetized sheep [Loick, Traber, Tokyay, Traber], A606
- plasma catecholamine and, during coarctation repair: isoflurane vs. neurolept anesthesia [Schmitt, Knoll, Danner], A57
- titrated doses of, dissociation between renal hemodynamic and functional effects of, in human kidney transplant [Jacob, Villiers, Boudaoud, Pruna, Payen, Teillac, Idatte, Eruin], A224
- dopexamine**
- effects of combined treatment with norepinephrine and, in human septic shock [Slomka, Nouira, Vaxelaire, Brunet, Dhainaut], A141
- dystrophy**
- reflex sympathetic, laser-Doppler measurements of skin blood flow during sympathetic blockade in patients with [Irazuzta, Berde, Sethna], A775
- reflex sympathetic, regional intravenous injection of Ca-antagonist in treatment of Raynaud's syndrome and [Kawanishi, Hosoda, Kurokawa, Enomoto, Shimada], A809
- reflex sympathetic, role of brachial plexus block after negative response from stellate ganglion block for [Durrani, Winnie], A837
- reflex sympathetic, thermographic symmetry and resolution of pain in [Korevaar, Zavitsanos, Loeb], A815
- ephedrine**
- phenylephrine vs., for hypotension due to thoracic epidural anesthesia associated with general anesthesia: effects on left ventricular function [Samain, Coriat, LeBret, Baron, Vrints, Viars], A82
- epinephrine**
- catecholamines and plasma renin activity during adenosine and sodium nitroprusside-induced hypotension [Lam, Winn, Grady], A175
- effect of epidural block level on plasma catecholamines [Bray, Stevens, Artuso, Kao, Pary], A832
- effect of spinal anesthesia in geriatric patients with heart disease: choice of vasopressor therapy to reverse hemodynamic changes [Rooke, Freund, Jacobson, Cerqueira], A140
- effects of catecholamines and blood transfusion on cellular immune function following trauma [Eustache, Lees, Petit, Godier, Oksenhendler, Winckler], A226
- increased alpha-1 receptor binding: possible mechanism for halothane-epinephrine "sensitization" [Miletich, Minshall, Albrecht], A721
- is dobutamine less chronotropic than, after coronary bypass surgery? [Butterworth, Prielipp, Zaloga, Royster, Robertie], A61
- magnesium inhibits  $\alpha 1$  - but not  $\beta 1$  - adrenergic actions of, in postoperative coronary artery bypass graft patients [Prielipp, Zaloga, Butterworth, Robertie, Royster], A282
- perioperative changes in QT interval in response to anesthetics and plasma catecholamines [Amar, Lazar, Gross, Shamoon, Frishman], A135
- phenylephrine vs., effects on renal autoregulation during epidural hypotensive anesthesia [Zayas, Sharrock, Blumenfeld, McDonald, Sealey], A70
- plasma catecholamine and dopamine concentration during coarctation repair: isoflurane vs. neurolept anesthesia [Schmitt, Knoll, Danner], A57
- reverses bupivacaine-induced cardiac arrest in rats [Wu, Bircher, Safar], A303
- esmolol**
- adrenal medullary response to hypotension and [Dickstein, Jordan, Miller], A548
- bolus doses of, for prevention of perioperative hypertension and tachycardia in cardiovascular surgery patients [Duke, Goertzen, Muirhead, Greengrass, Paetkau], A96
- change in effectiveness of, when used in repeated doses in electroconvulsive therapy [Howie, McSweeney, Zvara, Coffman, Black], A374
- comparison of ability of alfentanil and, to attenuate tachycardia and hypertension during emergence from inhalational anesthesia [Ewell, Fuhrman, Pippin, Weaver], A108
- controlled hypotension and, adverse effects on oxygen extraction [Quinn, Zayas, LeDonne, McDonald, Pickering], A94
- effects of, on cerebral microcirculation [Peck, Lu, Statkus, Gibson, Frost], A626
- effects of, on pulmonary reactivity in basenji-greyhound [Tobias, Sauder, Hirshman], A1194
- effects of clonidine, labetalol and, on hemodynamics and seizure during ECT [Reddy, Rao, Trivedi, Idupuganti, Shevde], A1201
- esmolol/N<sub>2</sub>O/relaxant: a new effective anesthetic maintenance technique [Geva, Sagi, Perel], A320

- increase in intraocular pressure during laryngoscopy and intubation and [Badrinath, Braverman, Ivankovich], A382
- nitroprusside vs., for hypotension: dose response during isoflurane anesthesia [DelValle, Edmondson, Reinsel, Shah, Herr, Bedford], A143
- reduction of halothane MAC in rats by [Partridge, Kon], A333
- therapeutic role of, in perioperative hypertension in ambulatory surgery [Dimich, Singh, Sampson, Pratilas, Sonnenklar], A12
- ganglionic blockade**
- differential effects of inhalational anesthetics on sympathetic ganglionic transmission [Bosnjak, Schedewie, Boban, Kampine], A688
- effects of, and catecholamines, on neurologic outcome in rats [Hoffman, Werner, Miletich, Albrecht, Schulte am Esch], A720
- Horner's syndrome**
- mechanism of, resulting from epidural, caudal, intercostal, interpleural and sympathetic nerve blocks [Shantha], A192
- impaired beta-adrenergic-cholinergic interaction leading to airway hyperreactivity in basenji-greyhound [Tobias, Sauder, Hirshman], A1160
- isoproterenol**
- inhibition by, of endothelin-mediated production of inositol phosphates in vascular smooth muscle cells [Xuan, Whorton, Watkins], A744
- maternal and fetal hemodynamic effects of, in gravid ewes [Norris, Arkoosh, Kirkland], A948
- naloxone potentiates inotropic but not chronotropic effects of, in vitro [Lechner], A587
- oral transmucosal permeability of fentanyl and, in dog model: pH dependence [Zhang, Ebert, de Boer, Niu, Stanley], A367
- labetalol**
- effects of clonidine, esmolol and, on hemodynamics and seizure during ECT [Reddy, Rao, Trivedi, Idupuganti, Shevde], A1201
- perioperative changes in QT interval in response to anesthetics and plasma catecholamines [Amar, Lazar, Gross, Shamoon, Frishman], A135
- medetomidine**
- stereoisomers, inhibition of human liver alfentanil metabolism by [Kharasch, Hill, Eddy], A379
- norepinephrine**
- catecholamines and plasma renin activity during adenosine and sodium nitroprusside-induced hypotension [Lam, Winn, Grady], A175
- dobutamine and, treatment in relation to oxygen delivery and consumption in endotoxin shock [Bakker, Vincent], A313
- effect of epidural block level on plasma catecholamines [Bray, Stevens, Artuso, Kao, Pary], A832
- effects of catecholamines and blood transfusion on cellular immune function following trauma [Eustache, Lees, Petit, Goudier, Oksenhendler, Winckler], A226
- effects of combined treatment with dopexamine and, in human septic shock [Slomka, Nouira, Vaxelaire, Brunet, Dhainaut], A141
- perioperative changes in QT interval in response to anesthetics and plasma catecholamines [Amar, Lazar, Gross, Shamoon, Frishman], A135
- plasma catecholamine and dopamine concentration during coarctation repair: isoflurane vs. neurolept anesthesia [Schmitt, Knoll, Danner], A57
- plasma concentrations of, and cardiovascular effects [Ensinger, Schulich, Heinrich, Grünert, Ahnefeld], A55
- right ventricular end-systolic pressure volume relationship during infusion of, in septic shock patients [Martin, Saux, Eon, Auf-fray, Gouin], A136
- pharmacology**
- clonidine decreases ischemic events during coronary artery surgery [Kent, Thomsen, Cicala], A129
- clonidine suppresses postepidural shivering: double blind study [Tryba, Zenz, Pern], A788
- dissociation between renal hemodynamic and functional effects of titrated doses of dopamine in human kidney transplant [Jacob, Villiers, Boudaoud, Pruna, Payen, Teillac, Idatte, Eruin], A224
- dobutamine and norepinephrine treatment in relation to oxygen delivery and consumption in endotoxin shock [Bakker, Vincent], A313
- dose-dependent effect of dopamine on hypoxic pulmonary vasoconstriction in anesthetized sheep [Loick, Traber, Tokyay, Traber], A606
- duration of block and analgesia after brachial plexus anesthesia with mepivacaine: effect of clonidine added to anesthetic solution [Singelyn, Gouverneur], A797
- effect of clonidine on postoperative oxygen consumption in humans: a double blind study [Goldfarb, Ang, Debaene, Chhim, Jolis], A317
- effect of clonidine premedication on postanesthetic recovery [Bellaiche, Sperandio, Roujas, Lerouge, Bonnett], A187
- effect of epidural block level on plasma catecholamines [Bray, Stevens, Artuso, Kao, Pary], A832
- effect of epidural clonidine on epidural fentanyl analgesia and pharmacokinetics in postoperative patients [Rostaing, Bonnet, Levron, Vodinh, Pluskwa], A779
- effect of spinal anesthesia in geriatric patients with heart disease: choice of vasopressor therapy to reverse hemodynamic changes [Rooke, Freund, Jacobson, Cerqueira], A140
- effects of catecholamines and blood transfusion on cellular immune function following trauma [Eustache, Lees, Petit, Goudier, Oksenhendler, Winckler], A226
- effects of clonidine, labetalol and esmolol on hemodynamics and seizure during ECT [Reddy, Rao, Trivedi, Idupuganti, Shevde], A1201
- effects of combined treatment with norepinephrine and dopexamine in human septic shock [Slomka, Nouira, Vaxelaire, Brunet, Dhainaut], A141
- effects of intramuscular or local clonidine for prolongation of brachial plexus block with lidocaine [Wyss, Karrp, Mons, Bellhacen, Alame, Ruelle], A821
- effects of oral clonidine as sole premedication on hemodynamic and catecholamine responses to both brief and prolonged laryngoscopy [Laurito, Baughman, Becker, Pygon, Cunningham, Citron], A98
- effects of urapidil on right ventricular function [Lepage, Pinaud, De Dieuleveult, Malinovsky, Souron], A125
- ephedrine vs. phenylephrine for hypotension due to thoracic epidural anesthesia associated with general anesthesia: effects on left ventricular function [Samain, Coriat, LeBret, Baron, Vrints, Viars], A82
- epinephrine reverses bupivacaine-induced cardiac arrest in rats [Wu, Bircher, Safar], A303
- epinephrine vs. phenylephrine: effects on renal autoregulation during epidural hypotensive anesthesia [Zayas, Sharrock, Blumenfeld, McDonald, Sealey], A70
- experimental resuscitation of bupivacaine cardiotoxic accidents: efficacy of clonidine-dobutamine combination [Viel, de La Coussaye, Bassoul, Eledjam, Sassine], A853
- intrathecal clonidine and response to hemorrhage [Eisenach], A758

- intravenous clonidine does not promote hypoxemia and platelet aggregation in man [DeKock, Singelyn, Gouverneur], A316
- is dobutamine less chronotropic than epinephrine after coronary bypass surgery? [Butterworth, Prielipp, Zaloga, Royster, Robertie], A61
- IV clonidine fails to inhibit postoperative shivering [Bernard, Hommerial, Passuti, Pinaud], A240
- low dose epidural clonidine enhances morphine analgesia without causing hypotension in rabbits [Wang, Hiller, Simon, Li, Rosenberg, Turndorf], A806
- magnesium inhibits  $\alpha$ 1- but not  $\beta$ 1- adrenergic actions of epinephrine in postoperative coronary artery bypass graft patients [Prielipp, Zaloga, Butterworth, Robertie, Royster], A282
- mass spectrometric measurement of oxygen uptake in postoperative period of major abdominal surgery: effect of clonidine [Quintin, Viale, Annat, Butin, Hoen, Cottet-Eymard, Motin], A252
- norepinephrine plasma concentrations and cardiovascular effects [Ensinger, Schulich, Heinrich, Grünert, Ahnefeld], A55
- perioperative changes in QT interval in response to anesthetics and plasma catecholamines [Amar, Lazar, Gross, Shamoon, Frishman], A135
- plasma catecholamine and dopamine concentration during coarctation repair: isoflurane vs. neurolept anesthesia [Schmitt, Knoll, Danner], A57
- right ventricular end-systolic pressure volume relationship during norepinephrine infusion in septic shock patients [Martin, Saux, Eon, Auffray, Gouin], A136
- site of intrathecal clonidine-induced hypotension [Eisenach], A754
- phenylephrine**
- compared to enflurane, isoflurane produces less depression of stroke volume and autonomic response in canines [Hoffman, Koev, Solomon, Banks, Yatsiv, Dolan, Clements, Natanson], A410
- diabetes-induced sensitivity of aortic contraction to, is time and endothelium dependent [Chang, Stevens, Lacy], A559
- effect of spinal anesthesia in geriatric patients with heart disease: choice of vasopressor therapy to reverse hemodynamic changes [Rooke, Freund, Jacobson, Cerqueira], A140
- ephedrine vs., for hypotension due to thoracic epidural anesthesia associated with general anesthesia: effects on left ventricular function [Samain, Coriat, LeBret, Baron, Vrints, Viars], A82
- epinephrine vs., effects on renal autoregulation during epidural hypotensive anesthesia [Zayas, Sharrock, Blumenfeld, McDonald, Sealey], A70
- myocardial O<sub>2</sub> supply/demand relations during pressor responses induced by [Crystal, Mahdi, Salem, Kim], A550
- propranolol**
- methylprednisolone prevents increases in airway responsiveness induced by, in basenji-greyhound dogs [Sauder, Tobias], A1158
- receptors**
- increased alpha-1 receptor binding: possible mechanism for halothane-epinephrine "sensitization" [Miletich, Minshall, Albrecht], A721
- magnesium inhibits  $\alpha$ 1- but not  $\beta$ 1- adrenergic actions of epinephrine in postoperative coronary artery bypass graft patients [Prielipp, Zaloga, Butterworth, Robertie, Royster], A282
- transmission**
- sympathetic ganglionic, differential effects of inhalational anesthetics on [Bosnjak, Schedewie, Boban, Kampine], A688
- urapidil**
- effects of, on right ventricular function [Lepage, Pinaud, De Dieuleveult, Malinovsky, Souron], A125
- Synapsis. See under Neuromuscular function**
- T**
- Temperature. See also under Skin**
- body**
- perioperative, regulation of, in regional vs. general anesthesia [Frank, Crowley, Parker, Christopherson, Williams, Rock, Perler, Beattie], A785
- cooling**
- decreased metabolic rate does not cause hypothermia during epidural anesthesia [Hynson, Sessler, Glosten, McGuire], A967
- heating**
- forced air warming minimizes hypothermia during orthotopic liver transplantation [Kelley, Csete, Prager, Sessler, Roberts, Ascher], A433
- use of forced air warming system for intraoperative warming [Gauthier], A462
- localized radiant heat restores oxygen consumption of postanesthesia shivering to normal [Harkey, Gulden, Lipton, Giesecke], A535
- measurement**
- bladder vs. tympanic core temperature measurement during cesarean section [Glosten, Sessler, Faure, Karl], A960
- metabolism**
- decreased metabolic rate does not cause hypothermia during epidural anesthesia [Hynson, Sessler, Glosten, McGuire], A967
- monitoring**
- comparison of crystalline skin temperature to esophageal temperatures during anesthesia [Brull, O'Connor, Poglitsch, Kosswig, Silverman], A472
- does liquid crystalline temperature monitoring estimate core temperature in anesthetized children? [Leon, Bissonnette, Lerman], A419
- flow rates and temperatures of resuscitation fluids by new infusion systems [Kavee, Boolbol, Capan], A516
- measurement offset with liquid crystal temperature indicators [Shomake, Bjoraker], A425
- regulation**
- of perioperative body temperature, in regional vs. general anesthesia [Frank, Crowley, Parker, Christopherson, Williams, Rock, Perler, Beattie], A785
- Teratogenicity. See under Toxicity**
- Tetracaine. See under Anesthetics, local**
- Theories of anesthetic action**
- actions of ethanol and volatile general anesthetics at boundary lipid [Firestone, Ferguson], A709
- lipid solubility**
- anesthetics fluidize membrane core and surface differently [Ueda, Tasi, Kamaya], A679
- protein-anesthetic interaction: conformational transition of polypeptide by volatile anesthetics [Chiou, Kamaya, Ueda], A726
- Thiamylal. See under Anesthetics, intravenous**
- Thiopental. See under Anesthetics, intravenous**
- Thoracic anesthesia. See under Anesthesia**
- Thoracic surgery. See under Surgery**
- Thrombosis. See under Complications**
- Thyroid hormone. See under Hormones**
- Tidal volume. See under Lungs; Ventilation**
- Tomography. See under Measurement techniques**
- Toxicity. See also under Oxygen**
- bupivacaine

- acute toxicity of desbutylbupivacaine and, in rat [Rosenberg, Heavner], A817
- cardiorespiratory toxicity, is reduced by diltiazem pretreatment in rats [Kinney, Kambam, Wright, Naukam], A811
- cardiorespiratory toxicity, is reduced by verapamil pretreatment in rats [Kinney, Kambam, Wright, Naukam], A812
- cardiotoxic accidents, experimental resuscitation of: efficacy of clonidine-dobutamine combination [Viel, de La Coussaye, Bassoul, Eledjam, Sassine], A853
- estrogen-induced increase in cardiac sensitivity to [Moller, Datta, Covino], A953
- immediate ventilatory support after apnea induced by, prevents CV collapse in anesthetized rats [Lina, Dauchot, Anton, Jezeski], A845
- nicardipine protects from cardiorespiratory toxicity induced by, in rats [Matsuda, Kinney, Wright, Kambam], A768
- protective effect of terbutaline on cardiotoxicity induced by [Mouton Perry, Kambam, Naukam, Wright], A958
- in rats, influence of anesthetics on [Lina, Dauchot, Jezeski], A855
- treatment of acute toxicity after rapid intravenous ropivacaine and, in conscious dog [Arthur, Feldman, Hurley, Doucette, Covino], A827
- cardiac**
- oxygen dependency of doxorubicin cardiotoxicity in perfused rat hearts [Mueller, Carter, Ganey, Thurman], A563
- cocaine**
- inhibition of pseudocholinesterase activity protects from cocaine-induced cardiorespiratory toxicity in rats [Kambam, Naukam, Parris, Franks, Wright], A581
- desbutylbupivacaine**
- acute toxicity of bupivacaine and, in rat [Rosenberg, Heavner], A817
- hepatic**
- glutathione depletion exacerbates halothane-associated hepatotoxicity in guinea pigs [Lind, Gandolfi], A398
- production and detection of volatile anesthetic-associated neoantigens in vitro [Brown, Hastings, Gandolfi], A350
- toxicity vs. protection by halothane during hypoxia: relationship to glutathione [Johnson, Van Dyke], A365
- intraoperative carbon monoxide toxicity [Moon, Meyer, Scott, Fox, Millington, Norwood], A1049
- lidocaine**
- pregnancy does not alter threshold for CNS toxicity to, in rats [Bucklin, Choi, Warner, Todd, Chestnut], A956
- local anesthetics**
- acute toxicity of bupivacaine and desbutylbupivacaine in rat [Rosenberg, Heavner], A817
- bupivacaine cardiorespiratory toxicity is reduced by diltiazem pretreatment in rats [Kinney, Kambam, Wright, Naukam], A811
- bupivacaine cardiorespiratory toxicity is reduced by verapamil pretreatment in rats [Kinney, Kambam, Wright, Naukam], A812
- estrogen-induced increase in cardiac sensitivity to bupivacaine [Moller, Datta, Covino], A953
- experimental resuscitation of bupivacaine cardiotoxic accidents: efficacy of clonidine-dobutamine combination [Viel, de La Coussaye, Bassoul, Eledjam, Sassine], A853
- immediate ventilatory support after bupivacaine-induced apnea prevents CV collapse in anesthetized rats [Lina, Dauchot, Anton, Jezeski], A845
- influence of anesthetics on bupivacaine toxicity in rats [Lina, Dauchot, Jezeski], A855
- inhibition of pseudocholinesterase activity protects from cocaine-induced cardiorespiratory toxicity in rats [Kambam, Naukam, Parris, Franks, Wright], A581
- nicardipine protects from bupivacaine-induced cardiorespiratory toxicity in rats [Matsuda, Kinney, Wright, Kambam], A768
- pregnancy does not alter threshold for CNS toxicity to lidocaine in rats [Bucklin, Choi, Warner, Todd, Chestnut], A956
- protective effect of terbutaline on bupivacaine-induced cardiotoxicity [Mouton Perry, Kambam, Naukam, Wright], A958
- treatment of acute toxicity after rapid intravenous ropivacaine and bupivacaine in conscious dog [Arthur, Feldman, Hurley, Doucette, Covino], A827
- neurotoxicity**
- of intrathecal midazolam in rabbits [Malinovsky, Mussini, Cozian, Lepage, Pinaud], A677
- ropivacaine**
- treatment of acute toxicity after rapid intravenous bupivacaine and, in conscious dog [Arthur, Feldman, Hurley, Doucette, Covino], A827
- teratogenicity**
- of N<sub>2</sub>O in rats, due to its sympathomimetic action on embryo? [Fujinaga, Baden], A354
- effects of nitrous oxide and/or halothane on cleavage rate during general anesthesia for oocyte retrieval [Palot, Visseaux, Harika, Carre-Pigeon, Rendoing], A930
- preventive effects of phenoxybenzamine on N<sub>2</sub>O-induced reproductive toxicity in sprague-dawley rats [Fujinaga, Baden, Suto, Myatt, Mazze], A920
- Tracheostomy. See under Surgery**
- Transcutaneous nerve stimulation. See under Pain**
- Transfusion**
- autotransfusion**
- analysis of five years experience in over 3,000 patients of intraoperative autologous blood salvage with cardiac surgery [Ikeda, Yaki, Johnston, Schweiss, Horman], A156
- hemodynamic alterations during autologous blood donation for children in severe cyanotic heart disease [Gombotz, Stein, Suppan, Metzler, Beitzke], A1118
- influence of heparin and citrate on quality of preop washed autotransfusional platelets and red blood cells [Mortelmans, Vermaut, Van Aken, Goossens], A496
- predeposited autologous blood use reduces frequency of homologous blood transfusion without hemodynamic compromise in cardiac surgery patients [Samule, Geary, Moberg, Sheikh, Lumb], A102
- removal of citrate from banked blood using cell-saver [Gunning, Swygert, Valek, Ramsay], A279
- routine, pleuri-vacs: hype or help? [Mancini, Hines, Mylott], A281
- what is best method to avoid homologous transfusion? [Rosenberg, Bernstein, Ramanathan], A1016
- complications**
- routine autotransfusion pleuri-vacs: hype or help? [Mancini, Hines, Mylott], A281
- Transplantation. See under Surgery**
- Trauma. See under Complications**
- Trimethaphan. See under Anesthetic techniques; Heart**
- Triphosphate. See under Anesthetic techniques**
- Tubes. See under Equipment**
- Tumor necrosis factor. See under Polypeptides**
- U**
- Ultrasound. See under Measurement techniques**
- Urapidil. See under Pharmacology; Sympathetic nervous system**
- Uremia. See under Kidney**
- Urologic anesthesia. See under Anesthesia**
- Uterus**
- blood flow**
- decreased, during cocaine-induced hypertension in pregnant ewe,

- hydralazine does not improve [Vertommen, Hughes, Shnider, Rosen, Espinoza, Messer], A928  
effects of ropivacaine on, in pregnant sheep [Santos, Wlody, Pederson, Morishima, Finster], A927  
maternal and fetal hemodynamic effects of isoproterenol in gravid ewes [Norris, Arkoosh, Kirkland], A948

## V

**Vagus nerve.** *See under* Parasympathetic nervous system

**Valves.** *See under* Equipment

**Vaporizers.** *See under* Equipment

**Vascular surgery.** *See under* Surgery

**Vecuronium.** *See under* Neuromuscular relaxants

## Veins

### cannulation

- ultrasound guided, of internal jugular vein [Troianos, Jobs, Ellison], A451  
venous thrombosis after central venous catheterization via axillary vein [Martin, Auffray, El sayed Hassan, Saux, Gouin], A1006

### compliance

- differential influence of pregnancy on limbs venous tone in humans [Edouard, Pannier, London, Safar], A955  
enflurane inhibits reflex venoconstriction of mesenteric capacitance vessels [Stadnicka, Bosnjak, Kampine], A651  
contribution of carotid chemoreceptors to changes in mesenteric vein diameter during acute hypercapnia in rabbit [Tominaga, Stekiel, McCallum, Bosnjak, Kampine], A632

### jugular

- ultrasound guided cannulation of, [Troianos, Jobs, Ellison], A451  
midazolam and flumazenil decrease vascular tone in isolated dog saphenous vein preparation [Glisson], A660

### venous pressure

- influence of venous return on ventilatory response to CO<sub>2</sub> in humans [Benameur, Duranteau, Reigner, Edouard, Ecoffey], A1146

**Venous pressure.** *See under* Veins

## Ventilation

- acetazolamide in treatment of acute mountain sickness: clinical efficacy and effect on gas exchange [Grison, Sarnquist, Roach, Hackett], A1183

- adjustment of, to control acidosis without sodium bicarbonate during liver transplantation [Just, Delva, Camus, Leinhart], A296

### airway pressure

- integrated coronary and systemic hemodynamic response to graded inspiratory resistive loading in chronically instrumented anesthetized dogs [Peters, Ihle], A611  
lung mechanics and transmission of, in infants after open-heart surgery [Räsänen, Peltola, Leijala], A285  
pediatric, release ventilation [Martin, Rafferty, Bilenki, Wetzel], A1133

### carbon dioxide response

- influence of venous return on ventilatory response to CO<sub>2</sub> in humans [Benameur, Duranteau, Reigner, Edouard, Ecoffey], A1146  
spinal anesthesia and midazolam exert antagonistic effects on, [Gauthier, Chung, Dyck, Romanelli, Chapman], A846  
ventilatory effects of desmedetomidine in humans [Belleville, Ward, Bloor, Maze], A1167  
chest wall mechanics during propofol anesthesia [Fierobe, Cantineau, Pande, Desmonts], A1144  
continuous flow apneic ventilation with helium-oxygen in dogs with bronchopleural fistula [Garcia, Bunegin, Smith], A1186

### continuous positive pressure breathing

- airway pressure release ventilation: importance of expiratory time [Smith, Leon, Diaz, Rachman], A1233

- comparison of imposed work of breathing between a flow regulated CPAP system and a demand flow CPAP system [Akashi, Noguchi], A247

- effects of, on microhemodynamics in arteriolar networks of lung [Goetz, Kuhnle, Leipfinger, Groh, Kuebler, Peter, Brendel], A1156

- differential effects of midazolam on inspiratory muscles [Molliex, Dureuil, Desmonts], A1145

### diffusion

- tracheal O<sub>2</sub> at low flow oxygenates and removes CO<sub>2</sub> during apnea [Mackenzie, Barnas, Nesbitt], A269

- effects of nitrous oxide on ventilatory response to sustained hypoxia in man [Dahan, Ward], A1168

- effects of prolonged almitrine intravenous infusion on gas exchange and hemodynamics in ARDS patients [Plaisance, Loriferne, Brun-Buisson, Lemaire], A1178

- exquisite management of pressure control inverse ratio ventilation by a computerized protocol [East, Böhm, Peng, Wallace, Morris], A284

### high frequency

- flows and blood gases during laryngoscopy with HFJV: influence of frequency [Cros, Roux, Janvier, Boudey, Guenard], A528  
improved MR imaging by ECT-triggered high-frequency ventilation [Groh, Welte, Seiderer, Staebler, Peter], A477  
use of UHFJV in management of ARDS [Patel, Mohr, Mathews, Pincus, Gluck], A257

- increased work required to breathe during fiberoptic bronchoscopy [Wissler, Boysen, Banner], A463

### intermittent positive pressure breathing

- pediatric airway pressure release ventilation [Martin, Rafferty, Bilenki, Wetzel], A1133

- intermittent mandatory pressure release ventilation in patients with acute respiratory failure [Vrillon, Rouby, Andreev, Jawish, Ameer, Viars], A255

- intraoperative changes in respiratory sinus arrhythmia: an indicator of anesthetic depth [Latson, Martin, Isaac], A520

- is conventional ventilation adequate in COPD patients during single-lung transplantation? [Rogers, Sharp, Hantler, Calhoon, Er-ian], A1184

### mechanical

- airway pressure release ventilation: importance of expiratory time [Smith, Leon, Diaz, Rachman], A1233

- measurement of respiratory system elastance and resistance during [Barnas, MacKenzie, Campbell, Mendham, Ho], A1157

- nitrous oxide stimulates expiratory muscles in dogs [Warner, Joyner, Loeffler, Rehder], A1172

### positive end expiratory pressure

- anesthesia ventilator performance, delivered tidal volume, and [Pan, van de Aa], A420

- comparison of imposed work of breathing between a flow regulated CPAP system and a demand flow CPAP system [Akashi, Noguchi], A247

- valves may doom pressure control inverse-ratio ventilation [East, Böhm, Peng, Hoffmann, Morris], A308

### postoperative

- hypoventilation and mixed etiology of postoperative hypoxemia [Russell, Graybeal], A1057

- stress of spontaneous breathing in children recovering from open heart surgery [Räsänen, Puhakka], A309

- systolic blood pressure variation in, a sensitive indicator of low preload states [Vrillon, LeBret, Vrints, Barre, Coriat, Viars], A243

- pulmonary macro- and microhemodynamics during normoxic and hypoxic ventilation [Goetz, Leipfinger, Kuhnle, Conzen, Peter, Brendel], A585

- respiratory effects of medical antishock trousers [Pansard, Lazard, Riou, Viars], A434
- respiratory sinus arrhythmia analysis during spinal anesthesia: evaluation of vagal tone in relation to anesthetic level [Baeuerle, Fox, Menk, Kingsley, Dellinger], A510
- resuscitation**
- immediate ventilatory support after bupivacaine-induced apnea prevents CV collapse in anesthetized rats [Lina, Dauchot, Anton, Jezeski], A845
  - prehospital, end tidal CO<sub>2</sub> monitoring during. [Rozenberg, Carli, Bousquet, Lamour, Barrier], A531
  - reliability of FEF end-tidal CO<sub>2</sub> detector during CPR [Mehta, Symreng, Sum Ping], A473
- slow injection does not prevent midazolam-induced ventilatory depression [Alexander, Teller, Gross], A1147
- spontaneous minute ventilation during halothane anaesthesia in infants and children [Brown, Bissonnette, Holtby, Gerus, Macpherson, Ein, Shandling], A1105
- tidal volume**
- anesthesia ventilator performance, PEEP and, [Pan, van de Aa], A420
- Ventilators. See under Equipment**
- Ventilatory position. See under Position**
- Ventilatory response. See under Carbon dioxide**
- Ventricles. See under Heart**
- Verapamil. See under Pharmacology**
- Veratridine. See under Pharmacology**
- Volatile anesthetics. See Anesthetics, volatile**
- Vomiting**
- antiemetics**
- dronabinol for preanesthetic medication [Taylor, Monk, White], A386
  - droperidol prophylaxis of post-operative nausea and vomiting, does gastric suction enhance efficacy of,? [Heyman, Salem, Joseph], A19
  - ondansetron, a selective serotonin type 3 antagonist, reduces nausea and vomiting in females following major gynecologic surgery [McKenzie, Odell, Rudy, Joslyn], A739
  - ondansetron, initial evaluation of, a novel antiemetic [Bodner, Poler, White], A328
  - ondansetron, randomized, double-blind comparison of placebo and, in treatment of postoperative nausea and vomiting [Larijani, Gratz, Jacobi, Afshar, Minassian, Zaren, deCastro, Karayannis, Joslyn, Simansky], A33
  - ondansetron an effective new antiemetic after outpatient anesthesia [Poler, Bodner, White], A18
  - ondansetron decreases emetic symptoms following outpatient laparoscopy [Wetchler, Sung, Duncalf, Joslyn], A36
  - ranitidine reduces nausea and vomiting after thiopental- isoflurane anesthesia [Kraynack, Bates], A42
- incidence**
- nitrous oxide does not increase postoperative nausea/vomiting in pediatric outpatients undergoing tonsillectomy- adenoidectomy [Pandit, Pryn, Randel, Levy, Lewis], A1245
  - perioperative substance P levels and incidences of pain and nausea and vomiting inhibition of acetylcholinesterase [Kambam, Blanks, Alhaddad, Naukam, Stowe], A10
  - randomized, double-blind comparison of ondansetron and placebo in treatment of postoperative nausea and vomiting [Larijani, Gratz, Jacobi, Afshar, Minassian, Zaren, deCastro, Karayannis, Joslyn, Simansky], A33
  - ranitidine reduces nausea and vomiting after thiopental- isoflurane anesthesia [Kraynack, Bates], A42
- intravenous lidocaine does not prevent postoperative vomiting in pediatric strabismus patients [Woelfel], A7
- nausea**
- menstruation increases risk of postoperative emesis [Lindblad, Beattie, Buckley, Forrest], A17
  - ondansetron decreases emetic symptoms following outpatient laparoscopy [Wetchler, Sung, Duncalf, Joslyn], A36
  - perioperative substance P levels and incidences of pain and vomiting and, inhibition of acetylcholinesterase [Kambam, Blanks, Alhaddad, Naukam, Stowe], A10
  - postoperative, does gastric suction enhance efficacy of droperidol prophylaxis of vomiting and,? [Heyman, Salem, Joseph], A19
  - postoperative, effects of mechanical evacuation of gastric contents on vomiting and [Artuso, Panico], A1068
  - postoperative, nitrous oxide does not increase vomiting and/or, in pediatric outpatients undergoing tonsillectomy- adenoidectomy [Pandit, Pryn, Randel, Levy, Lewis], A1245
  - postoperative vomiting and, randomized, double-blind comparison of ondansetron and placebo in treatment of [Larijani, Gratz, Jacobi, Afshar, Minassian, Zaren, deCastro, Karayannis, Joslyn, Simansky], A33
  - ranitidine reduces vomiting and, after thiopental-isoflurane anesthesia [Kraynack, Bates], A42
  - reduction of post-surgical vomiting and, in patients receiving N<sub>2</sub>O [Sacco, Grant, Luthringer, London, Kamps], A15
  - transdermal scopolamine does not decrease incidence of vomiting and, after alfentanil anesthesia [Bosek], A371
  - vomiting and, after general anesthesia: a comparison of morphine with oxymorphone [Popic, Jameson], A1063
- W**
- Warfarin. See under Pharmacology**
